# Supplementary material for: Genome-wide association study of pigmentary traits (skin and iris color) in individuals of East Asian ancestry
Source: PeerJ. 2017 Nov 2;5:e3951. doi: 10.7717/peerj.3951 (PMC5671666; doi:10.7717/peerj.3951)
Supplement: File S1 — All the regions indicated in the file have more than one genome-wide significant or suggestive marker with good imputation scores (info score >0.8). [file peerj-05-3951-s013.xlsx]

## Sheet: Skin pigmentation
rsid	chr	pos	NEA	EA	EAF	N	info	all_maf	p-value	beta	se	Gene	Annotation
rs7567238	2	217523735	C	A	0.0480329	305	0.683071	0.0480328	9.45e-06	1.02248	0.226921	IGFBP2
rs2003589	2	217527465	T	C	0.0632788	305	0.842909	0.0632787	9.54e-07	0.885128	0.17689	IGFBP2
rs9288522	2	217527963	A	G	0.0563934	305	0.811153	0.0563934	9.22e-06	0.87662	0.194313	IGFBP2
rs9288524	2	217530021	G	A	0.0508197	305	0.916057	0.0508197	5.09e-06	0.884859	0.190521	IGFBP2
rs67150883	2	217530385	GT	G	0.0509836	305	0.906317	0.0509836	5.55e-06	0.885227	0.191386	IGFBP2
.	2	217530389	A	C	0.0503279	305	0.906534	0.0503279	5.13e-06	0.89329	0.192408
rs116726051	2	217530390	A	C	0.0508197	305	0.916057	0.0508197	5.09e-06	0.884859	0.190521	IGFBP2
rs853812	5	67738430	G	A	0.52082	305	0.934936	0.47918	9.72e-06	-0.353583	0.0785826
rs853807	5	67752638	C	T	0.48541	305	0.955831	0.48541	8.45e-06	-0.347107	0.0766025		GERP: Conserved
rs534625063	6	71203756	CA	C	0.0969674	305	0.85795	0.0969672	6.35e-06	-0.66435	0.144573
rs28360504	6	71293172	C	A	0.0847541	305	0.974745	0.0847541	7.16e-06	-0.633958	0.13877	C6orf57
rs62421394	6	71293290	T	G	0.0868852	305	0.971691	0.0868852	4.55e-06	-0.640508	0.137177	C6orf57
rs57836066	6	71304950	T	G	0.0860656	305	0.978846	0.0860656	2.17e-06	-0.660824	0.136817	RP11-134K13.4
rs55825523	7	88392882	A	G	0.0795902	305	0.911885	0.0795902	5.69e-06	-0.719691	0.155787	ZNF804B
rs2373392	7	88449288	A	T	0.681885	305	0.988267	0.318115	5.13e-06	-0.383063	0.0825053	ZNF804B	GERP: Conserved
rs2373391	7	88449300	T	A	0.681066	305	0.986774	0.318934	4.98e-06	-0.384322	0.0826619	ZNF804B	GERP: Conserved
rs7945369	11	103425586	T	C	0.536803	305	0.96804	0.463197	5.26e-07	-0.404979	0.0789887
rs7938241	11	103426813	G	C	0.392049	305	0.977423	0.392049	1.81e-06	-0.380348	0.0781242
rs7942431	11	103427258	C	T	0.391475	305	0.995321	0.391475	1.73e-06	-0.383385	0.0785853
rs10895461	11	103429644	T	C	0.604181	305	0.970644	0.39582	2.2e-06	0.3842	0.0795853		Phast + GERP: Conserved
rs10895462	11	103430191	G	T	0.612541	305	0.971628	0.387459	2.01e-06	0.387298	0.0799147
rs11225872	11	103430782	A	G	0.604917	305	0.973454	0.395082	2.46e-06	0.382961	0.0797284
rs10895463	11	103431362	T	G	0.612295	305	0.970098	0.387705	1.99e-06	0.388051	0.0800246
rs10895466	11	103436964	G	A	0.599345	305	0.94303	0.400656	1.85e-06	0.394186	0.0810472
rs7951802	11	103438430	A	T	0.377542	305	0.901048	0.377541	8.07e-06	-0.37634	0.0828636
rs34315539	11	103438798	A	ATG	0.598279	305	0.880242	0.401721	1.85e-06	0.402433	0.0827288
rs12806863	11	103441804	C	T	0.599672	305	0.909348	0.400328	2.54e-06	0.391215	0.0815699
rs11225879	11	103446646	C	T	0.597951	305	0.883786	0.402049	4.55e-06	0.389407	0.0833973
rs12793801	11	103448497	C	T	0.610902	305	0.888084	0.389098	7.01e-06	0.385451	0.0842839
rs12364317	11	103449092	T	C	0.610328	305	0.88954	0.389672	7.62e-06	0.379784	0.0833898

## Sheet: L-iris
rsid	chr	pos	NEA	EA	EAF	N	info	all_maf	p-value	beta	se	Gene	Annotation		a-iris	b-iris	delta-iris		iris-mpheno
rs3738720	1	226796537	T	C	0.294079	342	0.988081	0.294079	8.42e-06	0.364989	0.080688	C1orf95			0.0025935	0.0301119	0.00332717		2.7789
rs112889488	1	226796968	T	TCTGA	0.29693	342	0.993417	0.29693	8.36e-06	0.361866	0.0799691	C1orf95			0.0025599	0.0288079	0.00342155		2.77353
rs6663978	1	226797334	T	C	0.297222	342	0.992861	0.297222	8.36e-06	0.360898	0.0797569	C1orf95			0.00221242	0.0236334	0.00350441		2.71675
rs6664080	1	226797426	T	C	0.29693	342	0.993417	0.29693	8.36e-06	0.361866	0.0799691	C1orf95			0.0025599	0.0288079	0.00342155		2.77353
rs113956823	3	36881962	G	GT	0.0559211	342	0.994808	0.0559211	9.76e-06	-0.727475	0.162012	TRANK1			0.000302884	0.00292931	0.458948		1.46641
rs73068054	3	36945794	G	A	0.0564327	342	0.949069	0.0564327	8.89e-06	-0.736849	0.163336	TRANK1			0.000210027	0.00234105	0.641581		1.47833
rs4425211	3	36951898	A	G	0.0715643	342	0.958688	0.0715643	7.14e-06	-0.676012	0.148242	TRANK1			6.79e-05	0.00063303	0.585012		1.67779
rs4398555	4	41028863	T	G	0.554971	342	0.988368	0.445029	9.59e-06	-0.324271	0.0721531	APBB2			0.00055803	0.00365942	0.750488		2.42255
rs6853006	4	41032029	C	T	0.555702	342	0.98493	0.444298	9.81e-06	-0.324241	0.0722311	APBB2			0.000494866	0.00328093	0.758698		2.40976
rs10553148	4	41036255	AGAT	A	0.555775	342	0.985211	0.444225	9.73e-06	-0.322702	0.0718589	APBB2			0.000459792	0.00311687	0.878424		2.41484
rs56004127	4	41043192	C	T	0.558333	342	0.975722	0.441667	7.8e-06	-0.332768	0.0732889	APBB2			0.000234885	0.00161803	0.761836		2.4658
rs12501370	4	41043870	G	C	0.555848	342	0.982146	0.444152	6.89e-06	-0.332256	0.0727304	APBB2			0.000313648	0.00193061	0.797045		2.50097
rs12505276	4	41044228	C	G	0.555702	342	0.982147	0.444298	7.2e-06	-0.33212	0.0728583	APBB2			0.000288499	0.00187346	0.810344		2.4894
rs35412910	4	41044690	C	CCA	0.557602	342	0.981865	0.442398	7.35e-06	-0.333261	0.0731822	APBB2			0.000346288	0.0023055	0.755216		2.48637
rs13109452	4	41044768	A	G	0.555702	342	0.982147	0.444298	7.2e-06	-0.33212	0.0728583	APBB2			0.000288499	0.00187346	0.810344		2.4894
rs1876493	4	41044938	G	C	0.554459	342	0.981165	0.445541	8.88e-06	-0.328729	0.0728664	APBB2			0.000485127	0.0028257	0.796306		2.42344
rs35131021	4	41048946	T	G	0.541374	342	0.990432	0.458626	8.38e-06	-0.326751	0.0722196	APBB2			0.00024886	0.00120237	0.943213		2.42717
rs12507094	4	41059425	G	A	0.540424	342	0.996277	0.459576	7.85e-06	-0.329732	0.0726417	APBB2			0.000206547	0.00126949	0.845274		2.46048
rs12511269	4	41060621	C	T	0.53962	342	0.996087	0.46038	8.34e-06	-0.328333	0.0725511	APBB2			0.000217637	0.00139359	0.783975		2.44507
rs6831604	4	41061049	G	A	0.54057	342	0.972023	0.45943	8e-06	-0.332897	0.0734097	APBB2			0.000274745	0.00173667	0.762824		2.44899
rs12650957	4	41064317	G	T	0.535015	342	0.960728	0.464985	7.46e-06	-0.334913	0.0735996	APBB2			0.000152307	0.00119202	0.871956		2.49593
rs12641331	4	41064640	C	T	0.538962	342	0.961624	0.461038	7.17e-06	-0.336184	0.0737351	APBB2			0.000301287	0.00165383	0.776334		2.47099
rs2658098	5	10124295	C	G	0.827778	342	0.97467	0.172222	9.57e-06	-0.460012	0.10235				0.0173434	0.106713	0.330141		2.86194
rs2658109	5	10127437	A	G	0.829898	342	0.980349	0.170102	7.36e-06	-0.466964	0.102552				0.0128669	0.084443	0.305782		2.85569
rs2658059	5	10129187	T	C	0.829678	342	0.982671	0.170322	6.16e-06	-0.469307	0.102174				0.0112988	0.0751749	0.303217		2.88424
rs2658089	5	10131796	C	T	0.82288	342	0.983675	0.17712	4.59e-06	-0.472977	0.101544				0.00573422	0.0444291	0.421969		2.80641
rs2662412	5	10132083	T	C	0.831433	342	0.994158	0.168567	4.16e-06	-0.47722	0.101988				0.00795618	0.05691	0.317354		2.92864
rs55765481	5	10132483	TA	T	0.82712	342	0.98106	0.17288	6.76e-06	-0.462506	0.101152				0.0126336	0.0787271	0.293304		2.88686
rs56290307	5	10132488	C	T	0.828728	342	0.982721	0.171272	4.24e-06	-0.475151	0.101626				0.0113953	0.0653631	0.319948		3.00031
rs60773201	5	10133301	T	C	0.832383	342	0.982475	0.167617	4.23e-06	-0.479351	0.102522				0.00895935	0.0621276	0.296722		2.9487
rs2662411	5	10133704	G	A	0.830117	342	0.98756	0.169883	4.83e-06	-0.473463	0.101889				0.0106896	0.0699134	0.295069		2.95892
rs2658085	5	10135053	G	A	0.833699	342	0.998023	0.166301	2.64e-06	-0.487032	0.101936				0.00678952	0.0483369	0.213652		3.0488
rs4458552	5	10135437	G	A	0.833333	342	1	0.166667	2.39e-06	-0.488299	0.101755	CTD-2199O4.1			0.00656132	0.0467431	0.224242		3.07852
rs2658084	5	10136135	C	T	0.835307	342	0.969739	0.164693	2.05e-06	-0.501949	0.103871	CTD-2199O4.1			0.00411016	0.0331878	0.22893		2.97571
rs4958172	5	133377162	G	A	0.267836	342	0.970812	0.267836	4.93e-06	0.405292	0.0873036				0.00034286	0.000221723	0.278052		2.65529
rs138848740	5	133379216	TC	T	0.266739	342	0.974941	0.26674	4.21e-06	0.408105	0.0872577				0.00027334	0.000200247	0.270026		2.67592
rs11746540	5	133380096	G	A	0.267106	342	0.970724	0.267105	4.73e-06	0.407119	0.0875312				0.00030084	0.000202198	0.290361		2.65508
rs200581009	5	133380340	C	CTG	0.238523	342	0.891436	0.238523	7e-06	0.42802	0.093766				0.000247423	0.000371713	0.360628		2.32935
.	5	133383820	T	G	0.268129	342	0.996834	0.268129	7.58e-06	0.390557	0.0858957
rs13357750	5	133384491	A	G	0.264693	342	0.987963	0.264693	4.01e-06	0.404341	0.0862654				0.000300286	0.000343783	0.246003		2.61999
rs11743714	5	133384609	A	G	0.264401	342	0.987804	0.264401	5.57e-06	0.402053	0.087109				0.000314931	0.000306325	0.28337		2.53724
rs11740710	5	133384656	T	C	0.265716	342	0.987842	0.265716	3.82e-06	0.406814	0.0865964				0.000263487	0.00025476	0.259424		2.65927
rs4958211	5	133385075	A	T	0.266082	342	0.988358	0.266082	6.31e-06	0.395	0.0861004				0.00040484	0.000373713	0.256252		2.52099
rs147505558	5	133386212	T	TGA	0.270103	342	0.975843	0.270102	3.7e-06	0.407488	0.0866055				0.000313939	0.000304927	0.259903		2.67018
rs34474496	5	133386314	T	C	0.268421	342	0.974054	0.268421	3.69e-06	0.408667	0.0868454				0.000341558	0.00034624	0.242206		2.66171
rs2013696	5	133386923	C	G	0.270687	342	0.966767	0.270687	3.68e-06	0.410421	0.0872077				0.000461472	0.000439528	0.24035		2.67788
rs3899437	5	133387934	A	C	0.269298	342	0.966529	0.269298	3.04e-06	0.413786	0.0871577				0.000350987	0.000355134	0.220799		2.72034
rs1813037	5	133388116	T	C	0.270614	342	0.965817	0.270614	2.97e-06	0.413812	0.0870749				0.000350183	0.000379107	0.259478		2.71685
rs199578647	5	133388806	C	CA	0.269299	342	0.9617	0.269298	4.24e-06	0.407295	0.0871212				0.000279571	0.000299348	0.336848		2.60292
rs4958213	5	133393591	G	A	0.281359	342	0.95743	0.28136	2.73e-06	0.414048	0.0867904				0.000310862	0.000649645	0.119553		2.65974
rs6876641	5	133394222	G	A	0.280263	342	0.959666	0.280263	4.12e-06	0.406817	0.0868985				0.000248568	0.000447539	0.161812		2.54296
rs74727724	5	133398856	T	C	0.278655	342	0.95676	0.278655	3.49e-06	0.41288	0.087514				0.000584492	0.000990703	0.118481		2.61752
.	5	133401821	G	A	0.286696	342	0.954425	0.286696	2.47e-06	0.417733	0.0871772
rs113633047	5	133402895	G	T	0.281652	342	0.950303	0.281652	2e-06	0.418911	0.0866079				0.000224812	0.000593587	0.108723		2.73493
rs60111777	5	133402911	C	T	0.280409	342	0.94939	0.280409	2.25e-06	0.421838	0.0876697				0.000380511	0.000905384	0.113737		2.70751
rs58504904	5	133403004	G	A	0.280409	342	0.94939	0.280409	2.25e-06	0.421838	0.0876697				0.000380511	0.000905384	0.113737		2.70751
rs561646138	5	133404025	G	GT	0.298392	342	0.943924	0.298392	1.78e-06	0.415821	0.0855369				0.000268235	0.000602226	0.199229		2.80233
rs78962119	5	133408702	C	A	0.293421	342	0.961568	0.293421	3.61e-06	0.407396	0.0864863				0.000449882	0.00123981	0.15362		2.56885
rs187380	5	133411871	C	T	0.283333	342	0.95698	0.283333	9.68e-06	0.388606	0.0865096				0.00172207	0.0035824	0.113556		2.34152
rs374087	6	25504649	G	T	0.23209	342	0.940548	0.232091	5.09e-06	-0.396368	0.0855093	LRRC16A			1.15e-05	1.18e-05	0.215091		2.84436
rs6924266	6	25505617	C	T	0.232895	342	0.979828	0.232895	4.38e-06	-0.407769	0.0873549	LRRC16A			3.64e-05	0.000104864	0.0876806		2.58314
.	6	32626040	C	T	0.0748538	342	0.995989	0.0748538	4.81e-06	-0.639914	0.137693
.	6	32653676	T	C	0.792178	342	0.998868	0.207822	8.85e-06	0.391127	0.0866819
.	6	32653721	T	A	0.792398	342	1	0.207602	9.11e-06	0.390428	0.0866536
.	6	32653726	G	A	0.792398	342	1	0.207602	9.11e-06	0.390428	0.0866536
.	6	32653997	A	G	0.792325	342	0.999578	0.207675	9.49e-06	0.389747	0.086677
.	6	32654037	T	A	0.792325	342	0.999578	0.207675	9.49e-06	0.389747	0.086677
.	6	32654174	C	T	0.792398	342	1	0.207602	9.11e-06	0.390428	0.0866536
.	6	32654181	G	A	0.792398	342	1	0.207602	9.11e-06	0.390428	0.0866536
rs57706984	6	108067067	A	T	0.192251	342	0.989173	0.192251	9.53e-06	-0.427849	0.0951707	SCML4			0.0022958	0.00960125	0.100127		2.2929
rs78647492	6	108070147	A	G	0.191155	342	0.987022	0.191155	8.73e-06	-0.431287	0.0955151	SCML4			0.00217902	0.0093525	0.0968351		2.31409
rs9400141	6	108078620	G	A	0.182602	342	0.949605	0.182602	8.57e-06	-0.447757	0.0990716	SCML4			0.00273046	0.0147459	0.075754		2.3408
.	6	108078809	A	G	0.182602	342	0.949605	0.182602	8.57e-06	-0.447757	0.0990716
rs12660169	6	108079021	A	C	0.182602	342	0.949605	0.182602	8.57e-06	-0.447757	0.0990716	SCML4			0.00273046	0.0147459	0.075754		2.3408
rs12663083	6	108079121	C	T	0.182602	342	0.949605	0.182602	8.57e-06	-0.447757	0.0990716	SCML4			0.00273046	0.0147459	0.075754		2.3408
rs9373973	6	108079595	T	A	0.184795	342	0.938278	0.184795	7.02e-06	-0.453617	0.0993923	SCML4			0.00218743	0.0112393	0.0910784		2.36031
rs9373975	6	108079834	G	A	0.184868	342	0.937642	0.184868	9.26e-06	-0.447911	0.0994903	SCML4			0.00302158	0.0129592	0.0925817		2.29627
rs9373976	6	108079900	T	C	0.185161	342	0.93607	0.185161	7.21e-06	-0.453254	0.0994375	SCML4			0.00225918	0.0116779	0.0906284		2.35694
rs75171305	8	97064199	C	T	0.0785088	342	0.964635	0.0785088	7.5e-06	0.648763	0.142606				2.14e-05	6.79e-05	0.640439		1.80785
rs526609	8	97066915	G	C	0.921272	342	0.967799	0.0787281	8.51e-06	-0.643855	0.142418				2.2e-05	7.13e-05	0.658774		1.79049
rs145048184	8	97070341	C	T	0.0836988	342	0.961636	0.0836988	6.23e-06	0.643007	0.140069				8.89e-06	3.05e-05	0.573694		1.94673
rs546239	11	128835758	C	T	0.819006	342	0.978845	0.180994	7.74e-06	0.438528	0.0965441	ARHGAP32	GERP: Conserved		0.000207168	0.0010109	0.607047		2.21677
rs610106	11	128935028	T	C	0.814401	342	0.969653	0.185599	6.79e-06	0.439559	0.0961518	ARHGAP32			0.000990521	0.00540315	0.939255		2.31843
rs651731	11	128952770	C	G	0.183699	342	0.988081	0.183699	8.31e-06	-0.431904	0.0954216	ARHGAP32			0.000627888	0.00302963	0.706868		2.22256
rs7964717	12	98145039	C	T	0.582164	342	0.990564	0.417836	9.96e-06	-0.338359	0.0754318	RP11-1016B18.1			0.0128744	0.011309	0.00480044		3.00433
.	12	98163232	T	A	0.584722	342	0.999714	0.415278	7.87e-06	-0.34318	0.0756138
rs7953987	12	98167068	G	A	0.584064	342	0.997141	0.415936	7.63e-06	-0.343902	0.0756593				0.00752111	0.00800583	0.00709834		2.91543
rs4762423	12	98168612	G	A	0.586257	342	1	0.413743	8.78e-06	-0.342749	0.0759296				0.00946526	0.00978147	0.00731851		2.92087
rs7965812	12	98168658	G	A	0.584795	342	1	0.415205	7.84e-06	-0.343144	0.0755946				0.00776393	0.00822238	0.00741547		2.9134
rs4762428	12	98172749	C	A	0.580117	342	0.988236	0.419883	4.84e-06	-0.351609	0.0756776				0.00617932	0.0070905	0.00906883		3.05984
rs35834815	12	98173365	ATAT	A	0.584064	342	0.992357	0.415936	5.84e-06	-0.350612	0.0761373				0.00775273	0.00818115	0.00581997		3.04852
rs11386084	12	98179589	A	AT	0.586623	342	0.987807	0.413377	3.67e-06	-0.363307	0.0771932				0.00397972	0.00262844	0.0202119		3.17752
rs34697680	12	98181381	TATTA	T	0.583918	342	0.995878	0.416082	1.8e-06	-0.37219	0.076595				0.00367416	0.0028008	0.0229018		3.45366
rs249625	12	98185248	A	G	0.583626	342	0.979033	0.416374	3.16e-06	-0.36429	0.0768703				0.00571554	0.00376701	0.00926902		3.35233
rs1420410	12	98187530	C	T	0.589546	342	0.980138	0.410453	4.63e-06	-0.3604	0.077408				0.00553242	0.00386586	0.0155087		3.13947
rs5800324	12	98190174	G	GT	0.577485	342	0.973546	0.422515	1.51e-06	-0.377073	0.0770149				0.00264826	0.00326628	0.0131979		3.34227
rs1800414	15	28197037	T	C	0.618641	342	0.972873	0.38136	1.67e-06	0.375176	0.0769632	OCA2	Nonsynonymous; SIFT and Polyphen: Damaging ; Phast + GERP: Conserved		2.98e-10	1.88e-11	0.315301		6.56864
rs76470826	15	28216972	AT	A	0.608626	342	0.946296	0.391374	6.43e-06	0.359128	0.0783488	OCA2			3.72e-10	3.01e-11	0.410916		6.46802
rs75295597	15	28227926	A	T	0.616521	342	0.895958	0.38348	9.1e-06	0.360588	0.0800238	OCA2			7.21e-09	7.13e-10	0.316227		5.32275
rs112244493	15	28232737	G	T	0.707602	342	0.868429	0.292398	3.62e-06	0.412787	0.0876459	OCA2			3.77e-09	9.69e-11	0.0830234		5.64016
.	20	55693671	G	A	0.0694444	342	0.990385	0.0694444	9.9e-06	-0.682674	0.152149
rs74945926	20	55701190	GTT	G	0.0609649	342	0.98506	0.0609649	9.25e-06	-0.72383	0.160766				0.000770264	0.00200389	0.856916		1.4566
rs75161997	20	55701691	C	T	0.0600146	342	0.99216	0.0600146	7.84e-06	-0.731556	0.161159				0.000749262	0.00176595	0.833721		1.48531
rs6025384	20	55701911	G	C	0.0600877	342	0.98641	0.0600877	9.79e-06	-0.725837	0.161673				0.000911388	0.00227724	0.887322		1.44277
rs74523092	20	55702264	G	A	0.0600146	342	0.99216	0.0600146	8.44e-06	-0.72905	0.161192		Phast + GERP: Conserved		0.000684848	0.00158688	0.851624		1.46975
rs2051396	21	38006319	G	A	0.147442	342	0.758579	0.147442	8.41e-06	-0.524134	0.115864	AP000696.2			0.0277236	0.199918	0.0207907		3.00589
rs401064	21	38011445	C	T	0.213816	342	0.984454	0.213816	5.12e-06	-0.416891	0.0899682				0.0133834	0.114455	0.0440333		3.3885
rs8127516	21	38011563	C	T	0.216228	342	0.98417	0.216228	5.74e-06	-0.413543	0.0897282				0.0144695	0.122224	0.0443019		3.3795
rs8131065	21	38011676	C	T	0.21462	342	0.979227	0.21462	4.75e-06	-0.418525	0.0899951				0.0148627	0.125495	0.0442557		3.47835
rs417557	21	38013006	C	T	0.212354	342	0.978825	0.212354	8.08e-06	-0.414054	0.0913498				0.0143828	0.115095	0.0489343		3.15885
rs412123	21	38013082	G	A	0.221053	342	0.976948	0.221053	7.48e-06	-0.407623	0.089592				0.0144774	0.121089	0.0580145		3.25393
rs393016	21	38016209	T	A	0.174635	342	0.947789	0.174635	5.74e-06	-0.452736	0.0982324				0.013932	0.132202	0.00971716		3.26748

## Sheet: a-iris
rsid	chr	pos	NEA	EA	EAF	N	info	all_maf	p-value	beta	se	Gene	Annotation		L-iris	b-iris	delta-iris		iris-mpheno
rs35429246	4	111399594	TA	T	0.77076	342	0.926482	0.22924	3.88e-06	0.435899	0.0928545	ENPEP			0.000246399	1.61e-06	5.71e-05		2.74897
rs55821297	4	111399598	A	G	0.770687	342	0.926106	0.229313	3.55e-06	0.43475	0.0922259	ENPEP			0.000296164	2.19e-06	4.86e-05		2.71009
rs6813719	4	111404413	A	G	0.749927	342	0.877509	0.250073	6.11e-06	0.417914	0.0909514	ENPEP			0.000335435	3.37e-06	9.55e-05		2.58492
rs6812955	4	111407479	C	T	0.749708	342	0.870393	0.250292	8.38e-06	0.414108	0.0915279	ENPEP			0.000305412	4.73e-06	0.000130695		2.48076
rs77339174	5	82036307	A	G	0.0880848	342	0.877828	0.0880848	7.11e-06	0.670019	0.146892				0.000398227	1.87e-06	0.946428		1.90163
rs72763726	5	82044846	C	T	0.0899124	342	0.949706	0.0899123	2.04e-06	0.652167	0.134939				0.000132483	4.6e-07	0.75695		2.34882
rs17205439	5	82047695	T	C	0.0966374	342	0.939376	0.0966374	5.03e-06	0.609617	0.13144				0.000265771	1.8e-06	0.919372		2.13225
rs74659527	5	82057889	G	T	0.0833333	342	0.914545	0.0833333	7.69e-06	0.663247	0.145967				0.000195791	7.73e-07	0.985073		2.07956
rs179335	5	119008916	T	C	0.501389	342	0.999722	0.498611	9.87e-06	-0.336673	0.0750208				0.00413318	4.74e-06	0.839251		2.85376
rs11406867	5	119015012	T	TG	0.5	342	0.998509	0.5	5.94e-06	-0.346208	0.0752422	CTC-507E12.1			0.00356779	2.69e-06	0.865505		3.05875
rs330203	5	119016414	C	G	0.499635	342	0.996477	0.499635	7.02e-06	-0.343367	0.0752317	CTC-507E12.1	Phast: conserved		0.00405	3.4e-06	0.873984		2.99729
rs6870583	5	119027886	G	C	0.491594	342	0.998698	0.491594	9.37e-06	-0.336869	0.0748684				0.00394711	5.46e-06	0.870702		2.82812
rs9345521	6	65511281	C	A	0.466593	342	0.976283	0.466594	2.59e-06	0.352045	0.0736219	EYS			0.000163662	6.92e-05	0.52743		2.87916
rs2132280	6	65511633	C	G	0.465278	342	0.979183	0.465278	5.32e-06	0.341838	0.0739067	EYS			0.000230994	0.000137762	0.671026		2.66526
rs79653018	6	120152278	T	G	0.0722953	342	0.99297	0.0722953	9.88e-06	-0.655091	0.145983				0.00244995	0.000178005	0.936089		1.71167
rs78134911	6	120160303	T	C	0.0723684	342	0.987913	0.0723684	6.42e-06	-0.670637	0.1463				0.00200687	0.000135677	0.959602		1.79839
rs78001527	6	120168240	G	C	0.0739035	342	0.972711	0.0739035	3.74e-06	-0.686017	0.145876				0.00165314	6.68e-05	0.924392		1.89242
rs569326657	6	120175219	A	ATT	0.0720029	342	0.975112	0.0720029	7.42e-06	-0.672064	0.147647				0.00168767	0.000154655	0.959265		1.73483
rs6977845	7	67216370	T	A	0.0929826	342	0.881254	0.0929825	2.42e-06	0.66553	0.138764				0.000257557	5.04e-05	0.782489		1.97887
rs2902929	7	67238617	T	C	0.0661551	342	0.880196	0.066155	9.67e-06	0.721257	0.160555				0.00127762	8.88e-05	0.74253		1.47491
rs1545397	15	28187772	A	T	0.877558	342	0.980033	0.122442	7.91e-06	0.523528	0.115379	OCA2			0.00755261	2.05e-06	0.918674		2.60645
rs7175733	15	28192063	T	C	0.148977	342	0.941593	0.148977	5.24e-06	-0.497203	0.107411	OCA2			0.000239793	2.6e-06	0.302506		2.41739
rs76930569	15	28196145	C	T	0.622807	342	1	0.377193	9.27e-11	0.496822	0.0742782	OCA2			1.03e-06	5.3e-12	0.342014		7.007
rs1800414	15	28197037	T	C	0.618641	342	0.972873	0.38136	2.98e-10	0.487574	0.0750874	OCA2	Nonsynonymous; SIFT and Polyphen: Damaging ; Phast + GERP: Conserved		1.67e-06	1.88e-11	0.315301		6.56864
rs12593141	15	28205100	G	A	0.831067	342	0.933953	0.168933	4.89e-07	0.51451	0.100301	OCA2			0.000138881	8.36e-08	0.0595617		3.40439
rs12440942	15	28208734	A	G	0.833699	342	0.931643	0.166301	8.95e-07	0.509259	0.101735	OCA2			0.000410996	1.88e-07	0.057948		3.2084
rs11853085	15	28215471	G	A	0.835087	342	0.928502	0.164912	7.46e-06	0.475254	0.104443	OCA2			0.000763002	1.64e-06	0.0618848		2.54627
rs76470826	15	28216972	AT	A	0.608626	342	0.946296	0.391374	3.72e-10	0.491911	0.0761982	OCA2			6.43e-06	3.01e-11	0.410916		6.46802
rs200881214	15	28217966	GTTATTTTATT	G	0.84386	342	0.916892	0.15614	7.42e-06	0.485647	0.106698	OCA2	GERP: conserved		0.00104741	1.62e-06	0.085522		2.53225
rs75295597	15	28227926	A	T	0.616521	342	0.895958	0.38348	7.21e-09	0.465475	0.0784154	OCA2			9.1e-06	7.13e-10	0.316227		5.32275
rs531547853	15	28232701	TA	T	0.769956	342	0.798044	0.230044	6.38e-07	0.487843	0.0961226				0.00216635	3.27e-07	0.122107		3.51336
rs112244493	15	28232737	G	T	0.707602	342	0.868429	0.292398	3.77e-09	0.520196	0.085948	OCA2			3.62e-06	9.69e-11	0.0830234		5.64016
rs12442916	15	28233207	G	A	0.708406	342	0.857582	0.291594	1.46e-08	0.50511	0.0869744	OCA2			3.84e-05	4.24e-10	0.100896		5.24
rs7162812	15	28233734	G	A	0.281068	342	0.862117	0.281067	2.09e-07	-0.464121	0.0875698	OCA2			8.44e-05	1.77e-08	0.256546		4.10527
rs10775262	15	28233905	T	C	0.698904	342	0.868295	0.301096	4.82e-08	0.478645	0.0857214	OCA2			0.000134128	1.56e-09	0.302479		4.95562
rs10775263	15	28233913	C	T	0.727558	342	0.864564	0.272442	4.47e-09	0.523662	0.0869561	OCA2			1.09e-05	6.22e-10	0.132009		5.14075
rs730502	15	28234410	G	T	0.722734	342	0.865886	0.277266	6.42e-09	0.516387	0.0866896	OCA2			1.82e-05	4.03e-10	0.12947		5.25462
rs3214781	15	28234463	A	AT	0.286038	342	0.868724	0.286038	5.33e-07	-0.45103	0.0882323	OCA2	Phast: conserved		0.000217804	5.51e-09	0.2236		4.5217
rs1800404	15	28235773	C	T	0.38655	342	0.990752	0.38655	1.94e-06	-0.36121	0.0745668	OCA2	Tfbs: human, mouse; Phast and Gerp: conserved		0.000512829	7.13e-06	0.604036		2.95048
rs33997466	15	28236800	A	AT	0.388889	342	1	0.388889	1.23e-06	-0.365966	0.0740921	OCA2			0.000450179	5.14e-06	0.648532		3.10993
rs66972965	15	28237251	CT	C	0.408406	342	0.934452	0.408406	2.83e-06	-0.358709	0.0753116	OCA2			0.000767165	1.16e-05	0.650067		2.82946
rs12911960	15	28237521	T	C	0.388889	342	1	0.388889	1.23e-06	-0.365966	0.0740921	OCA2			0.000450179	5.14e-06	0.648532		3.10993
rs11630828	15	28237566	G	A	0.388889	342	1	0.388889	1.23e-06	-0.365966	0.0740921	OCA2			0.000450179	5.14e-06	0.648532		3.10993
rs7178315	15	28237909	T	C	0.384137	342	0.963895	0.384137	1.04e-06	-0.37492	0.0753542	OCA2			0.000390881	3.29e-06	0.553228		3.16565
rs1868331	15	28238073	G	A	0.384576	342	0.962922	0.384576	1.16e-06	-0.373761	0.0754755	OCA2			0.000388413	3.95e-06	0.565264		3.11538
rs1868332	15	28238083	G	A	0.384576	342	0.962922	0.384576	1.16e-06	-0.373761	0.0754755	OCA2			0.000388413	3.95e-06	0.565264		3.11538
rs1868333	15	28238158	G	A	0.382309	342	0.96013	0.38231	2.11e-06	-0.365186	0.0756746	OCA2			0.000543705	7.32e-06	0.554969		2.91401
rs1868334	15	28238363	C	A	0.384942	342	0.964216	0.384942	1.08e-06	-0.374425	0.0753734	OCA2			0.000373016	3.68e-06	0.568734		3.14108
rs12595216	15	28238519	A	G	0.384942	342	0.964216	0.384942	1.08e-06	-0.374425	0.0753734	OCA2			0.000373016	3.68e-06	0.568734		3.14108
rs735066	15	28238895	A	G	0.381872	342	0.958936	0.381871	1.52e-06	-0.369304	0.07545	OCA2			0.000480145	6.71e-06	0.560815		3.01542
rs735067	15	28238902	G	C	0.384942	342	0.964216	0.384942	1.08e-06	-0.374425	0.0753734	OCA2			0.000373016	3.68e-06	0.568734		3.14108
rs2015343	15	28239301	A	G	0.384942	342	0.964216	0.384942	1.08e-06	-0.374425	0.0753734	OCA2			0.000373016	3.68e-06	0.568734		3.14108
rs8029026	15	28239710	T	C	0.385233	342	0.963053	0.385234	1.08e-06	-0.374542	0.0753972	OCA2			0.000373132	3.66e-06	0.576516		3.14129
.	15	28239735	T	C	0.384942	342	0.964216	0.384942	1.08e-06	-0.374425	0.0753734
rs8041084	15	28240034	G	A	0.384942	342	0.964216	0.384942	1.08e-06	-0.374425	0.0753734	OCA2			0.000373016	3.68e-06	0.568734		3.14108
rs8024822	15	28240304	A	C	0.384942	342	0.964216	0.384942	1.08e-06	-0.374425	0.0753734	OCA2			0.000373016	3.68e-06	0.568734		3.14108
.	15	28240601	C	T	0.384942	342	0.964216	0.384942	1.08e-06	-0.374425	0.0753734
rs5811523	15	28240705	A	ATTT	0.381944	342	0.960162	0.381944	4.21e-06	-0.354129	0.0757226	OCA2			0.00106439	1.56e-05	0.614465		2.71097
rs4778223	15	28240990	G	A	0.382675	342	0.961553	0.382675	1.8e-06	-0.367497	0.0756181	OCA2			0.000439629	6.52e-06	0.539358		2.95461
rs4778224	15	28241020	A	G	0.393933	342	0.950262	0.393933	5.53e-07	-0.379964	0.0744372	OCA2			0.000377215	1.36e-06	0.55438		3.44255
rs4778225	15	28241157	C	T	0.384795	342	0.963038	0.384795	8.46e-07	-0.377813	0.0753004	OCA2			0.000324954	3.34e-06	0.602008		3.21147
rs4778226	15	28241189	A	C	0.384942	342	0.964216	0.384942	1.08e-06	-0.374425	0.0753734	OCA2			0.000373016	3.68e-06	0.568734		3.14108
rs4778227	15	28241199	C	T	0.384942	342	0.964216	0.384942	1.08e-06	-0.374425	0.0753734	OCA2			0.000373016	3.68e-06	0.568734		3.14108
rs12914545	15	28241574	T	G	0.384942	342	0.964216	0.384942	1.08e-06	-0.374425	0.0753734	OCA2			0.000373016	3.68e-06	0.568734		3.14108
rs71132828	15	28241741	G	GA	0.380482	342	0.954273	0.380482	8.29e-07	-0.38242	0.0761544	OCA2			0.000271779	4.08e-06	0.499562		3.18103
rs36163088	15	28242309	G	A	0.384796	342	0.963038	0.384795	9.11e-07	-0.376858	0.0753405	OCA2			0.00034471	3.6e-06	0.603575		3.18796
rs150570624	15	28242386	G	GGAAA	0.382018	342	0.95953	0.382018	1.39e-06	-0.37245	0.075784	OCA2			0.000389225	5.39e-06	0.526635		3.03562
rs8037151	15	28242528	G	A	0.384942	342	0.964216	0.384942	1.08e-06	-0.374425	0.0753734	OCA2			0.000373016	3.68e-06	0.568734		3.14108
rs8037533	15	28242800	G	A	0.380264	342	0.957411	0.380263	1.31e-06	-0.373785	0.0758767	OCA2			0.000346167	6.24e-06	0.48812		3.03535
rs9672634	15	28242879	C	A	0.384942	342	0.964216	0.384942	1.08e-06	-0.374425	0.0753734	OCA2			0.000373016	3.68e-06	0.568734		3.14108
rs35483922	15	28243177	A	G	0.381944	342	0.95431	0.381944	7.66e-07	-0.381674	0.0757612	OCA2			0.000294158	3.03e-06	0.529082		3.23388
rs35624876	15	28243216	C	T	0.384942	342	0.964216	0.384942	1.08e-06	-0.374425	0.0753734	OCA2			0.000373016	3.68e-06	0.568734		3.14108
rs12906778	15	28244036	T	C	0.384284	342	0.961737	0.384284	1.16e-06	-0.373827	0.075495	OCA2			0.000386262	3.74e-06	0.583577		3.11821
rs28818582	15	28245334	G	A	0.381798	342	0.96124	0.381798	3.75e-06	-0.357502	0.0760313	OCA2			0.000902052	1.07e-05	0.510904		2.75218
rs12592367	15	28246287	T	G	0.385234	342	0.96364	0.385234	1.02e-06	-0.375438	0.0754089	OCA2			0.000351771	3.57e-06	0.561386		3.15411
rs11636259	15	28246990	G	A	0.38231	342	0.960099	0.38231	3.47e-06	-0.359006	0.0760788	OCA2			0.000880452	9.41e-06	0.519361		2.78324
rs12440330	15	28249585	C	T	0.603801	342	0.942431	0.396199	1.6e-06	0.36977	0.0756968	OCA2			0.000578324	3.91e-06	0.451836		3.05514
rs4778136	15	28250156	T	C	0.625366	342	0.932933	0.374635	4.86e-07	0.395527	0.0770859	OCA2			0.000140846	1.23e-06	0.536519		3.3694

## Sheet: b-iris
rsid	chr	pos	NEA	EA	EAF	N	info	all_maf	p-value	beta	se	Gene	Annotation		L-iris	a-iris	delta-iris		iris-mpheno
rs35858007	4	74356175	G	A	0.189254	342	0.97344	0.189254	5.51e-07	-0.497877	0.0975191	AFM			0.11413	0.000424601	0.194548		4.4232
rs12510870	4	74358277	T	C	0.190058	342	0.994397	0.190058	3.68e-07	-0.495853	0.0955947	AFM			0.106006	0.000336991	0.159803		4.61377
rs55904677	4	74385977	C	G	0.189766	342	0.980175	0.189766	1.27e-06	-0.468965	0.0950601	RP11-622A1.2			0.10446	0.000622627	0.253428		4.06458
rs10938086	4	74396706	C	T	0.77193	342	0.983433	0.22807	7.12e-06	0.40664	0.0891595	RP11-622A1.2			0.110935	0.00140292	0.153126		3.42205
rs13353732	4	74397154	A	G	0.767763	342	0.99465	0.232237	9.54e-06	0.394548	0.0877685	RP11-622A1.2			0.104261	0.00171734	0.149654		3.30528
rs66501353	4	74410033	G	A	0.19693	342	0.955904	0.19693	1.23e-06	-0.469342	0.0950173	RP11-622A1.1			0.0566217	0.000419661	0.285696		3.74185
rs72649104	4	74415221	T	G	0.197003	342	0.952197	0.197003	8.7e-06	-0.433849	0.0960668				0.102019	0.00159897	0.241355		3.18173
rs4694625	4	74425932	A	G	0.218129	342	0.952381	0.218129	7.17e-06	-0.415953	0.0912334				0.131132	0.00109282	0.184937		3.39332
rs6533514	4	111337840	A	G	0.77829	342	0.950033	0.221711	5.88e-06	0.425044	0.0923318	ZNF969P			0.00251897	3.35e-05	0.00319953		2.36594
rs6827254	4	111338887	C	G	0.782383	342	0.948157	0.217617	8.58e-06	0.423153	0.093633	ZNF969P	Phase: conserved		0.00251648	5.21e-05	0.00274358		2.22803
rs6533516	4	111340345	T	C	0.781944	342	0.948747	0.218056	3.49e-06	0.438452	0.0929444	ZNF969P			0.00155065	2.24e-05	0.00167594		2.48961
rs9307354	4	111341634	G	C	0.780921	342	0.954474	0.219079	7.89e-06	0.422109	0.0930148	ZNF969P			0.00234224	4.96e-05	0.00215617		2.25651
rs373010735	4	111342532	A	AATTTATAG	0.768056	342	0.91065	0.231944	4.38e-06	0.429833	0.0920733	ENPEP			0.00316227	4.25e-05	0.00338272		2.46412
rs2348208	4	111343693	G	A	0.780702	342	0.953418	0.219298	8.37e-06	0.421155	0.0930771	ENPEP			0.00244224	5.39e-05	0.002231		2.23889
rs2348207	4	111343941	A	G	0.780921	342	0.954474	0.219079	7.89e-06	0.422109	0.0930148	ENPEP			0.00234224	4.96e-05	0.00215617		2.25651
rs2046579	4	111344826	G	A	0.78114	342	0.954163	0.21886	3.68e-06	0.435318	0.0925005	ENPEP			0.00201847	2.9e-05	0.00140296		2.48707
rs6533517	4	111351696	C	G	0.780921	342	0.954474	0.219079	7.89e-06	0.422109	0.0930148	ENPEP			0.00234224	4.96e-05	0.00215617		2.25651
rs1487260	4	111354224	C	G	0.780921	342	0.954474	0.219079	7.89e-06	0.422109	0.0930148	snoU2_19			0.00234224	4.96e-05	0.00215617		2.25651
rs2129564	4	111358688	C	G	0.780921	342	0.954474	0.219079	7.89e-06	0.422109	0.0930148	ENPEP			0.00234224	4.96e-05	0.00215617		2.25651
rs1318244	4	111359510	G	A	0.780994	342	0.954869	0.219006	7.5e-06	0.422425	0.0928557	ENPEP			0.00280437	4.99e-05	0.00211742		2.28205
rs10008438	4	111363899	A	T	0.780848	342	0.960743	0.219152	5.45e-06	0.427498	0.0925313	ENPEP			0.00191394	3.47e-05	0.00205266		2.36667
rs2017368	4	111364167	T	C	0.780629	342	0.959683	0.219371	6.41e-06	0.424596	0.0926196	ENPEP			0.00206377	4.02e-05	0.00203935		2.31941
rs2017302	4	111364318	T	C	0.780848	342	0.960743	0.219152	5.45e-06	0.427498	0.0925313	ENPEP			0.00191394	3.47e-05	0.00205266		2.36667
rs2348214	4	111369566	T	G	0.781433	342	0.961951	0.218567	5.12e-06	0.428703	0.0925125	ENPEP			0.00243434	3.67e-05	0.00224012		2.39639
rs35701308	4	111369848	AT	A	0.774781	342	0.92738	0.225219	8.6e-06	0.421416	0.0932624	ENPEP			0.00212939	7.11e-05	0.0015931		2.22405
rs939214	4	111371101	G	T	0.781141	342	0.962287	0.21886	5.23e-06	0.427598	0.0923661	ENPEP			0.00268045	3.45e-05	0.00140384		2.40124
rs1320281	4	111371195	C	T	0.780921	342	0.960712	0.219079	4.71e-06	0.430714	0.0925814	ENPEP			0.0020889	3.14e-05	0.00157429		2.41509
rs7696406	4	111373078	A	C	0.78114	342	0.961774	0.21886	5.28e-06	0.428307	0.0925652	ENPEP			0.00226083	3.48e-05	0.00155298		2.38397
rs1996603	4	111378362	G	A	0.779094	342	0.959693	0.220906	1.61e-06	0.450736	0.0922995	ENPEP			0.00131693	1.22e-05	0.00159703		2.72801
rs34141904	4	111379586	C	CAAG	0.781287	342	0.962954	0.218713	6.15e-06	0.424537	0.0924244	ENPEP			0.00244539	3.88e-05	0.00146504		2.34348
.	4	111379719	A	G	0.78114	342	0.961774	0.21886	5.28e-06	0.428307	0.0925652
rs11277583	4	111383195	ATATGGC	A	0.779239	342	0.986785	0.22076	8.02e-06	0.414604	0.0914367	ENPEP			0.00262196	4.34e-05	0.00137296		2.28057
rs6533520	4	111387806	T	C	0.780994	342	0.986709	0.219006	5.23e-06	0.422121	0.0911821	ENPEP			0.00237977	3.31e-05	0.00143248		2.40889
rs7670649	4	111399119	G	A	0.763085	342	0.931606	0.236915	6.52e-06	0.417585	0.091163	ENPEP			0.000576705	1.77e-05	3.81e-05		2.34858
rs35429246	4	111399594	TA	T	0.77076	342	0.926482	0.22924	1.61e-06	0.45231	0.0926234	ENPEP			0.000246399	3.88e-06	5.71e-05		2.74897
rs55821297	4	111399598	A	G	0.770687	342	0.926106	0.229313	2.19e-06	0.443764	0.0920995	ENPEP			0.000296164	3.55e-06	4.86e-05		2.71009
rs6813719	4	111404413	A	G	0.749927	342	0.877509	0.250073	3.37e-06	0.429034	0.090799	ENPEP			0.000335435	6.11e-06	9.55e-05		2.58492
rs6812955	4	111407479	C	T	0.749708	342	0.870393	0.250292	4.73e-06	0.42503	0.0913805	ENPEP			0.000305412	8.38e-06	0.000130695		2.48076
rs117720623	5	82028513	C	T	0.0830409	342	0.885088	0.0830409	4.45e-06	0.694267	0.14884				0.00285539	6.73e-05	0.657944		1.728
rs77339174	5	82036307	A	G	0.0880848	342	0.877828	0.0880848	1.87e-06	0.70999	0.146338				0.000398227	7.11e-06	0.946428		1.90163
rs72763726	5	82044846	C	T	0.0899124	342	0.949706	0.0899123	4.6e-07	0.690923	0.13437				0.000132483	2.04e-06	0.75695		2.34882
rs17205439	5	82047695	T	C	0.0966374	342	0.939376	0.0966374	1.8e-06	0.636837	0.13106				0.000265771	5.03e-06	0.919372		2.13225
rs76123396	5	82055315	G	A	0.0921784	342	0.920464	0.0921784	5.29e-06	0.635033	0.137259				0.000631175	2.18e-05	0.786446		1.80758
rs6863549	5	82055864	G	A	0.0947368	342	0.90036	0.0947368	3.04e-06	0.652605	0.13747				0.000933025	1.53e-05	0.625693		1.91683
rs74659527	5	82057889	G	T	0.0833333	342	0.914545	0.0833333	7.73e-07	0.730318	0.145022				0.000195791	7.69e-06	0.985073		2.07956
rs7713051	5	82062722	C	T	0.0980263	342	0.808647	0.0980263	6.71e-06	0.659039	0.144078	CTD-2218K11.2			0.000504537	1.47e-05	0.679032		1.70821
rs7730715	5	119006954	A	C	0.491594	342	0.998347	0.491594	9.24e-06	-0.334755	0.0743481				0.00569642	1.59e-05	0.914354		2.67405
rs179335	5	119008916	T	C	0.501389	342	0.999722	0.498611	4.74e-06	-0.348181	0.0748662				0.00413318	9.87e-06	0.839251		2.85376
rs11406867	5	119015012	T	TG	0.5	342	0.998509	0.5	2.69e-06	-0.358376	0.0750745	CTC-507E12.1			0.00356779	5.94e-06	0.865505		3.05875
rs330203	5	119016414	C	G	0.499635	342	0.996477	0.499635	3.4e-06	-0.354629	0.0750779	CTC-507E12.1	Phase: conserved		0.00405	7.02e-06	0.873984		2.99729
rs6870583	5	119027886	G	C	0.491594	342	0.998698	0.491594	5.46e-06	-0.34535	0.0747547				0.00394711	9.37e-06	0.870702		2.82812
rs141034411	8	3098640	C	A	0.412866	342	0.935346	0.412865	3.69e-06	0.352648	0.0749462	CSMD1			9.47e-05	3.2e-05	0.571075		2.84345
rs11785155	8	3101446	T	A	0.438743	342	0.938433	0.438743	9.26e-06	0.334174	0.0742273	CSMD1			0.000227412	6.43e-05	0.983371		2.50534
rs11785156	8	3101447	T	C	0.426608	342	0.948989	0.426608	7.94e-06	0.334803	0.0738022	CSMD1			0.000162868	6.17e-05	0.942069		2.60246
rs11424399	10	71147630	A	AT	0.580775	342	0.904541	0.419225	1.68e-06	-0.373428	0.0766198	HK1			0.00241937	1.14e-05	0.22235		2.99142
rs3829185	10	71149319	A	C	0.701023	342	0.990583	0.298977	9.38e-06	-0.372804	0.0828619	HK1			0.00837941	0.000317737	0.236164		2.49633
rs757103349	10	71150132	TTTCATAGCTAC	T	0.700146	342	0.982939	0.299854	9.68e-06	-0.373809	0.0832147				0.00718175	0.000315532	0.239077		2.46862
rs1867976	10	71150485	T	C	0.703289	342	0.97956	0.296711	9.23e-06	-0.375404	0.0833737	HK1			0.00584001	0.000296078	0.253301		2.46889
rs2278745	10	71152091	T	C	0.601681	342	0.966342	0.398319	2.95e-07	-0.394833	0.0754711	HK1			0.00304848	5.7e-06	0.150571		3.6679
rs1545397	15	28187772	A	T	0.877558	342	0.980033	0.122442	2.05e-06	0.555424	0.114939	OCA2			0.00755261	7.91e-06	0.918674		2.60645
rs7175733	15	28192063	T	C	0.148977	342	0.941593	0.148977	2.6e-06	-0.512491	0.107199	OCA2			0.000239793	5.24e-06	0.302506		2.41739
rs76930569	15	28196145	C	T	0.622807	342	1	0.377193	5.3e-12	0.526823	0.0736677	OCA2			1.03e-06	9.27e-11	0.342014		7.007
rs7173419	15	28196821	T	C	0.127851	342	0.994592	0.127851	8.64e-06	-0.498869	0.110425	OCA2			0.0023935	2.69e-05	0.541693		2.06788
rs1800414	15	28197037	T	C	0.618641	342	0.972873	0.38136	1.88e-11	0.517677	0.0744924	OCA2	Nonsynonymous; SIFT and Polyphen: Damaging ; Phast + GERP: Conserved		1.67e-06	2.98e-10	0.315301		6.56864
rs12593141	15	28205100	G	A	0.831067	342	0.933953	0.168933	8.36e-08	0.546751	0.0997978	OCA2			0.000138881	4.89e-07	0.0595617		3.40439
rs56192849	15	28205329	A	G	0.851023	342	0.978033	0.148977	6.69e-06	0.481994	0.105357	OCA2			0.00290536	2.94e-05	0.11659		2.19285
rs12440942	15	28208734	A	G	0.833699	342	0.931643	0.166301	1.88e-07	0.538949	0.101284	OCA2			0.000410996	8.95e-07	0.057948		3.2084
rs4778219	15	28213850	C	T	0.838889	342	0.934718	0.161111	3.94e-06	0.49994	0.10657	OCA2			0.00123936	1.81e-05	0.042773		2.27865
rs11853085	15	28215471	G	A	0.835087	342	0.928502	0.164912	1.64e-06	0.507365	0.103998	OCA2			0.000763002	7.46e-06	0.0618848		2.54627
rs76470826	15	28216972	AT	A	0.608626	342	0.946296	0.391374	3.01e-11	0.519964	0.0756484	OCA2			6.43e-06	3.72e-10	0.410916		6.46802
rs200881214	15	28217966	GTTATTTTATT	G	0.84386	342	0.916892	0.15614	1.62e-06	0.518631	0.10624	OCA2			0.00104741	7.42e-06	0.085522		2.53225
rs28795193	15	28217974	A	C	0.152339	342	0.920522	0.152339	4.99e-06	-0.501567	0.108102	OCA2			0.000582977	1.3e-05	0.078245		2.21422
rs12442009	15	28223573	C	T	0.864401	342	0.993982	0.135599	9.82e-06	0.493809	0.110011	OCA2			0.00245872	1.49e-05	0.172273		2.12921
rs12438364	15	28224952	C	T	0.857018	342	0.985683	0.142982	8.58e-06	0.490325	0.108498	OCA2			0.00345843	2.38e-05	0.164162		2.13875
rs75295597	15	28227926	A	T	0.616521	342	0.895958	0.38348	7.13e-10	0.494204	0.0778966	OCA2			9.1e-06	7.21e-09	0.316227		5.32275
rs3794609	15	28229255	G	A	0.852339	342	0.912355	0.147661	9.82e-06	0.49537	0.110357	OCA2			0.00204883	1.36e-05	0.184488		2.12293
rs531547853	15	28232701	TA	T	0.769956	342	0.798044	0.230044	3.27e-07	0.499924	0.0959399				0.00216635	6.38e-07	0.122107		3.51336
rs112244493	15	28232737	G	T	0.707602	342	0.868429	0.292398	9.69e-11	0.568248	0.0850484	OCA2			3.62e-06	3.77e-09	0.0830234		5.64016
rs12442916	15	28233207	G	A	0.708406	342	0.857582	0.291594	4.24e-10	0.553882	0.0860967	OCA2			3.84e-05	1.46e-08	0.100896		5.24
rs7162812	15	28233734	G	A	0.281068	342	0.862117	0.281067	1.77e-08	-0.501888	0.0869549	OCA2			8.44e-05	2.09e-07	0.256546		4.10527
rs10775262	15	28233905	T	C	0.698904	342	0.868295	0.301096	1.56e-09	0.526991	0.0848832	OCA2			0.000134128	4.82e-08	0.302479		4.95562
rs10775263	15	28233913	C	T	0.727558	342	0.864564	0.272442	6.22e-10	0.550582	0.0864657	OCA2			1.09e-05	4.47e-09	0.132009		5.14075
rs730502	15	28234410	G	T	0.722734	342	0.865886	0.277266	4.03e-10	0.554016	0.0860036	OCA2			1.82e-05	6.42e-09	0.12947		5.25462
rs3214781	15	28234463	A	AT	0.286038	342	0.868724	0.286038	5.51e-09	-0.521165	0.0870884	OCA2	Phase: conserved		0.000217804	5.33e-07	0.2236		4.5217
rs1800404	15	28235773	C	T	0.38655	342	0.990752	0.38655	7.13e-06	-0.341323	0.0748419	OCA2	tfbs: mouse, human		0.000512829	1.94e-06	0.604036		2.95048
rs33997466	15	28236800	A	AT	0.388889	342	1	0.388889	5.14e-06	-0.344648	0.0743921	OCA2			0.000450179	1.23e-06	0.648532		3.10993
rs12911960	15	28237521	T	C	0.388889	342	1	0.388889	5.14e-06	-0.344648	0.0743921	OCA2			0.000450179	1.23e-06	0.648532		3.10993
rs11630828	15	28237566	G	A	0.388889	342	1	0.388889	5.14e-06	-0.344648	0.0743921	OCA2			0.000450179	1.23e-06	0.648532		3.10993
rs7178315	15	28237909	T	C	0.384137	342	0.963895	0.384137	3.29e-06	-0.357635	0.0756009	OCA2			0.000390881	1.04e-06	0.553228		3.16565
rs1868331	15	28238073	G	A	0.384576	342	0.962922	0.384576	3.95e-06	-0.355264	0.0757378	OCA2			0.000388413	1.16e-06	0.565264		3.11538
rs1868332	15	28238083	G	A	0.384576	342	0.962922	0.384576	3.95e-06	-0.355264	0.0757378	OCA2			0.000388413	1.16e-06	0.565264		3.11538
rs1868333	15	28238158	G	A	0.382309	342	0.96013	0.38231	7.32e-06	-0.345878	0.075941	OCA2			0.000543705	2.11e-06	0.554969		2.91401
rs1868334	15	28238363	C	A	0.384942	342	0.964216	0.384942	3.68e-06	-0.355941	0.0756363	OCA2			0.000373016	1.08e-06	0.568734		3.14108
rs12595216	15	28238519	A	G	0.384942	342	0.964216	0.384942	3.68e-06	-0.355941	0.0756363	OCA2			0.000373016	1.08e-06	0.568734		3.14108
rs735066	15	28238895	A	G	0.381872	342	0.958936	0.381871	6.71e-06	-0.346575	0.0757665	OCA2			0.000480145	1.52e-06	0.560815		3.01542
rs735067	15	28238902	G	C	0.384942	342	0.964216	0.384942	3.68e-06	-0.355941	0.0756363	OCA2			0.000373016	1.08e-06	0.568734		3.14108
rs2015343	15	28239301	A	G	0.384942	342	0.964216	0.384942	3.68e-06	-0.355941	0.0756363	OCA2			0.000373016	1.08e-06	0.568734		3.14108
rs8029026	15	28239710	T	C	0.385233	342	0.963053	0.385234	3.66e-06	-0.35616	0.0756587	OCA2			0.000373132	1.08e-06	0.576516		3.14129
.	15	28239735	T	C	0.384942	342	0.964216	0.384942	3.68e-06	-0.355941	0.0756363
rs8041084	15	28240034	G	A	0.384942	342	0.964216	0.384942	3.68e-06	-0.355941	0.0756363	OCA2			0.000373016	1.08e-06	0.568734		3.14108
rs8024822	15	28240304	A	C	0.384942	342	0.964216	0.384942	3.68e-06	-0.355941	0.0756363	OCA2			0.000373016	1.08e-06	0.568734		3.14108
.	15	28240601	C	T	0.384942	342	0.964216	0.384942	3.68e-06	-0.355941	0.0756363
rs4778223	15	28240990	G	A	0.382675	342	0.961553	0.382675	6.52e-06	-0.347636	0.0758938	OCA2			0.000439629	1.8e-06	0.539358		2.95461
rs4778224	15	28241020	A	G	0.393933	342	0.950262	0.393933	1.36e-06	-0.367042	0.0746277	OCA2			0.000377215	5.53e-07	0.55438		3.44255
rs4778225	15	28241157	C	T	0.384795	342	0.963038	0.384795	3.34e-06	-0.357364	0.0755934	OCA2			0.000324954	8.46e-07	0.602008		3.21147
rs4778226	15	28241189	A	C	0.384942	342	0.964216	0.384942	3.68e-06	-0.355941	0.0756363	OCA2			0.000373016	1.08e-06	0.568734		3.14108
rs4778227	15	28241199	C	T	0.384942	342	0.964216	0.384942	3.68e-06	-0.355941	0.0756363	OCA2			0.000373016	1.08e-06	0.568734		3.14108
rs12914545	15	28241574	T	G	0.384942	342	0.964216	0.384942	3.68e-06	-0.355941	0.0756363	OCA2			0.000373016	1.08e-06	0.568734		3.14108
rs71132828	15	28241741	G	GA	0.380482	342	0.954273	0.380482	4.08e-06	-0.358293	0.0764987	OCA2			0.000271779	8.29e-07	0.499562		3.18103
rs36163088	15	28242309	G	A	0.384796	342	0.963038	0.384795	3.6e-06	-0.356325	0.0756338	OCA2			0.00034471	9.11e-07	0.603575		3.18796
rs150570624	15	28242386	G	GGAAA	0.382018	342	0.95953	0.382018	5.39e-06	-0.351675	0.0760753	OCA2			0.000389225	1.39e-06	0.526635		3.03562
rs8037151	15	28242528	G	A	0.384942	342	0.964216	0.384942	3.68e-06	-0.355941	0.0756363	OCA2			0.000373016	1.08e-06	0.568734		3.14108
rs8037533	15	28242800	G	A	0.380264	342	0.957411	0.380263	6.24e-06	-0.349822	0.076212	OCA2			0.000346167	1.31e-06	0.48812		3.03535
rs9672634	15	28242879	C	A	0.384942	342	0.964216	0.384942	3.68e-06	-0.355941	0.0756363	OCA2			0.000373016	1.08e-06	0.568734		3.14108
rs148497826	15	28243009	A	G	0.186038	342	0.623298	0.186038	8.25e-06	-0.535928	0.118358	OCA2			0.00118689	4.63e-05	0.150117		1.93271
rs35483922	15	28243177	A	G	0.381944	342	0.95431	0.381944	3.03e-06	-0.361125	0.0760569	OCA2			0.000294158	7.66e-07	0.529082		3.23388
rs35624876	15	28243216	C	T	0.384942	342	0.964216	0.384942	3.68e-06	-0.355941	0.0756363	OCA2			0.000373016	1.08e-06	0.568734		3.14108
rs12906778	15	28244036	T	C	0.384284	342	0.961737	0.384284	3.74e-06	-0.356214	0.0757451	OCA2			0.000386262	1.16e-06	0.583577		3.11821
rs12592367	15	28246287	T	G	0.385234	342	0.96364	0.385234	3.57e-06	-0.356629	0.075677	OCA2			0.000351771	1.02e-06	0.561386		3.15411
rs11636259	15	28246990	G	A	0.38231	342	0.960099	0.38231	9.41e-06	-0.343191	0.0762931	OCA2			0.000880452	3.47e-06	0.519361		2.78324
rs12440330	15	28249585	C	T	0.603801	342	0.942431	0.396199	3.91e-06	0.356133	0.0758889	OCA2			0.000578324	1.6e-06	0.451836		3.05514
rs4778136	15	28250156	T	C	0.625366	342	0.932933	0.374635	1.23e-06	0.381726	0.0772903	OCA2			0.000140846	4.86e-07	0.536519		3.3694

## Sheet: Delta-iris
rsid	chr	pos	NEA	EA	EAF	N	info	all_maf	p-value	beta	se	Gene	Annotation		L-iris	a-iris	b-iris		iris-mpheno
rs55818850	2	2783688	G	A	0.382968	342	0.960543	0.382968	2.82e-06	-0.373597	0.0784288				0.000200579	0.126938	0.184851		2.41714
rs1469813	2	2787149	A	G	0.384356	342	0.963238	0.384357	1.23e-06	-0.388395	0.0786225				9.73e-05	0.0972004	0.125746		2.66
rs4146909	2	2787699	T	C	0.382822	342	0.964343	0.382822	2.25e-06	-0.377716	0.0784902				0.000138109	0.0990289	0.114654		2.48195
rs4146910	2	2787735	G	A	0.363889	342	0.989294	0.363889	1.02e-06	-0.389637	0.0782459				0.000148691	0.0935054	0.115683		2.39443
rs36191577	2	2788737	G	T	0.366813	342	0.962705	0.366813	6.53e-07	-0.400189	0.0789223				0.000107177	0.0920367	0.0697151		2.67444
rs72776813	2	2792075	G	A	0.210892	342	0.979553	0.210892	4.25e-07	-0.481277	0.093309				0.00117737	0.082149	0.0715444		1.22597
rs7580109	2	2795043	G	A	0.312354	342	0.978032	0.312354	2.24e-06	-0.388687	0.0807503				0.000578067	0.0984667	0.146947		1.64374
rs11695235	2	2795206	G	A	0.315936	342	0.9839	0.315936	8.28e-06	-0.364398	0.0804923				0.000882841	0.135675	0.205914		1.59405
rs46716	4	111281026	T	C	0.478289	342	0.991841	0.478289	9.69e-06	-0.335442	0.0746792				8.45e-05	0.0012726	0.000621197		1.9379
rs243978	4	111281932	C	T	0.477266	342	0.995034	0.477266	9.46e-06	-0.333179	0.0740864				9.36e-05	0.00229865	0.00122655		1.88131
rs243977	4	111283494	A	G	0.478582	342	0.99606	0.478582	9.46e-06	-0.333038	0.0740529				8.7e-05	0.00225382	0.00121922		1.90232
rs243976	4	111283780	C	A	0.478363	342	0.996807	0.478363	9.66e-06	-0.332345	0.0739787				9.79e-05	0.00248439	0.0012733		1.88008
rs243973	4	111286032	C	T	0.480702	342	0.996896	0.480702	9.08e-06	-0.334157	0.0741505	ENPEP			9.34e-05	0.00257395	0.00149171		1.86167
rs243970	4	111288232	A	C	0.513962	342	0.985793	0.486038	8.12e-06	-0.339618	0.0749445	ENPEP			0.00230698	0.0437021	0.0195297		1.00448
rs243946	4	111300362	C	T	0.480921	342	0.984378	0.480921	7.74e-06	-0.338618	0.0745498	ENPEP			0.000151668	0.0036031	0.00198704		1.71554
rs243943	4	111302550	C	T	0.480775	342	0.984377	0.480775	8.18e-06	-0.337856	0.0745852	ENPEP			0.00015107	0.00353711	0.00194247		1.71739
rs243941	4	111302634	G	A	0.480629	342	0.984377	0.480629	8.25e-06	-0.337636	0.0745665	ENPEP			0.000153503	0.00358903	0.00197463		1.71184
rs243930	4	111307582	A	G	0.486915	342	0.98439	0.486915	9.78e-06	-0.335407	0.0747066	ENPEP			0.000160151	0.00347539	0.00185062		1.70513
.	4	111308310	T	C	0.470906	342	0.966671	0.470906	7.56e-06	-0.341106	0.0750089
rs243927	4	111308470	A	G	0.486769	342	0.98439	0.486769	7.78e-06	-0.338172	0.0744708	ENPEP			0.000136133	0.00378762	0.00210014		1.75477
rs2348213	4	111321459	C	T	0.521053	342	0.926068	0.478947	8.39e-06	0.346637	0.0766164	RPL7L1P13			9.19e-05	0.00325054	0.00205064		1.84349
rs13123641	4	111322857	T	C	0.517982	342	0.916588	0.482018	8.1e-06	0.350176	0.0772643	RPL7L1P13			0.000176599	0.00399978	0.00201704		1.68324
rs2348215	4	111396528	A	C	0.794298	342	0.991142	0.205702	9.96e-06	0.415602	0.0926535	ENPEP			0.00125227	4.26e-05	2.24e-05		1.99841
rs10004516	4	111398208	A	G	0.792836	342	0.962704	0.207164	9.37e-06	0.421345	0.0936467	ENPEP	GERP: Conserved		0.00182767	7.22e-05	4.2e-05		1.81426
rs16904127	8	130628606	G	A	0.469006	342	0.904135	0.469006	7.13e-06	-0.3588	0.0786744	CCDC26			0.23009	0.801003	0.577692		0.132294
rs4636162	8	130639540	G	A	0.485526	342	0.908315	0.485526	7.76e-06	-0.356146	0.0784186	CCDC26			0.154459	0.717965	0.738019		0.52894
rs7914735	10	110441149	C	T	0.536842	342	0.988093	0.463158	3.03e-06	-0.35555	0.0748794				0.064605	0.339745	0.354432		-0.226879
rs12571889	10	110442762	G	A	0.5375	342	0.988017	0.4625	4.68e-06	-0.352211	0.0756829				0.0712807	0.366249	0.363727		-0.234008
rs4562739	10	110446632	C	T	0.536769	342	0.988931	0.463231	4.17e-06	-0.352904	0.0754245				0.0737956	0.377624	0.385523		-0.245428
rs12770837	10	110447332	C	A	0.535088	342	0.986571	0.464912	5e-06	-0.350877	0.0756366				0.0736198	0.335005	0.324747		-0.275016
rs34678256	10	110447914	T	C	0.535599	342	0.987319	0.464401	4.57e-06	-0.351531	0.0754578				0.0818406	0.340821	0.349741		-0.327414
rs4344420	10	110449452	A	G	0.536769	342	0.986403	0.463231	4.02e-06	-0.353728	0.0754755				0.0724622	0.363877	0.373351		-0.250333
rs67660256	10	110457746	ATGC	A	0.545102	342	0.955589	0.454898	6.04e-06	-0.348826	0.075872				0.122434	0.487552	0.470292		-0.378396
rs11194230	10	110459019	G	A	0.545906	342	0.956328	0.454094	4.65e-06	-0.354264	0.0761064				0.0869492	0.471544	0.519262		-0.23263
.	14	106875131	A	G	0.521711	342	0.883626	0.478289	5.63e-06	-0.374374	0.0811563
.	14	106995495	T	A	0.428656	342	0.848435	0.428655	8.8e-06	-0.368386	0.0816168
.	14	106997363	A	C	0.397515	342	0.789489	0.397515	8.22e-06	-0.387963	0.085664
rs35703209	19	9125629	G	A	0.402266	342	0.971529	0.402266	6.82e-06	0.33468	0.0732275				0.0451812	0.496722	0.359284		0.261606
rs34872811	19	9126018	G	A	0.409504	342	0.965084	0.409503	8.47e-06	0.328944	0.0727401				0.0292009	0.426517	0.356966		0.353228
rs11667379	19	9126468	G	C	0.411039	342	0.95445	0.411038	3.45e-06	0.347941	0.07371				0.0170392	0.34411	0.291777		0.532048
rs71183666	19	9135774	C	CA	0.333552	342	0.934051	0.333553	8.74e-06	0.352168	0.0780003				0.00590196	0.480129	0.268898		1.73491
rs12462970	19	9137185	G	T	0.407749	342	0.945665	0.407749	9.71e-06	0.333707	0.0743012				0.0360059	0.648267	0.777527		0.547724
rs12978278	19	9168672	C	T	0.141009	342	0.966536	0.141009	9.66e-06	0.486179	0.108219				0.249556	0.995412	0.747597		0.00557813
