# Supplementary material for: Genome-wide association study of pigmentary traits (skin and iris color) in individuals of East Asian ancestry
Source: PubMed Central journal article supplement (PMC5671666; doi:10.7717/peerj.3951), 2017-11-02
Supplement: peerj-05-3951-s006.pdf [file peerj-05-3951-s006.pdf]

# rs2003589

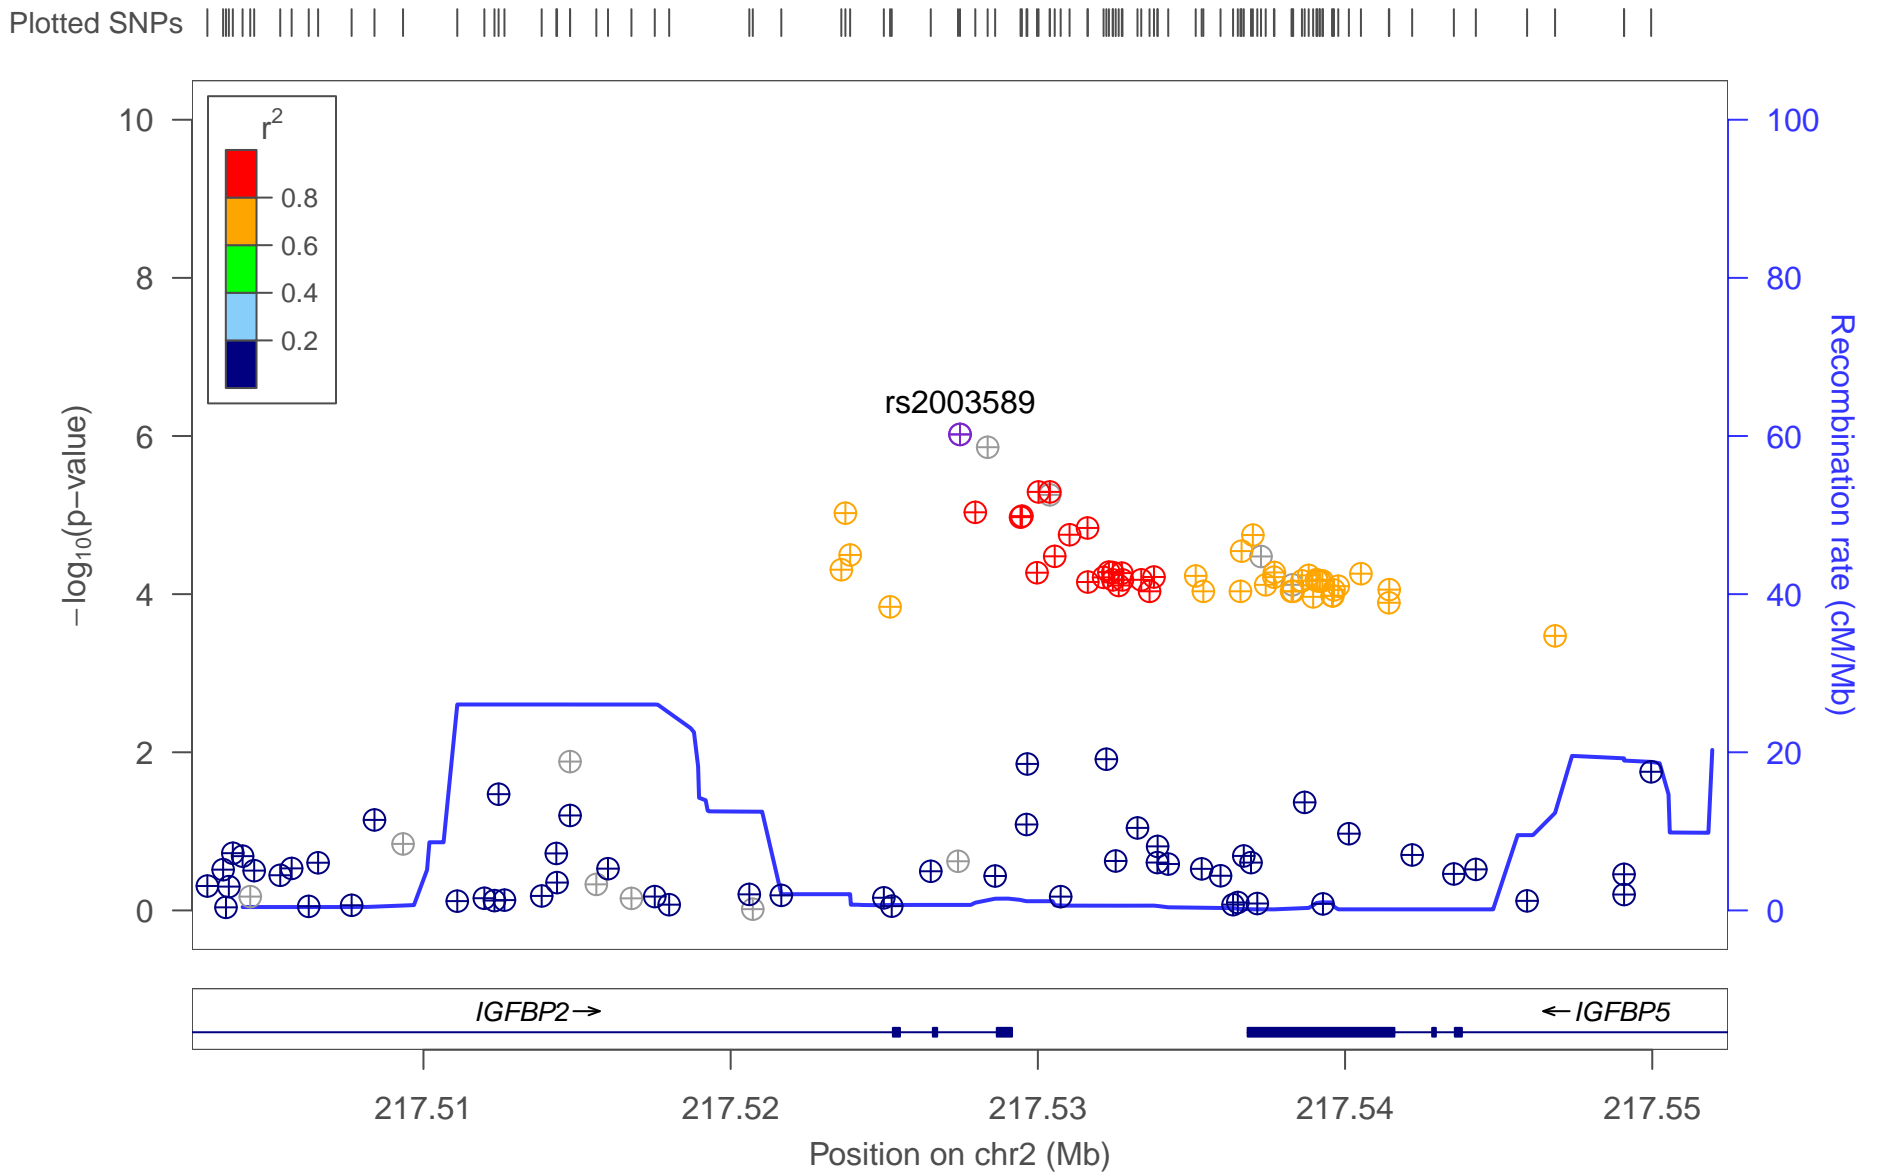

date: Wed Oct 19 17:08:09 2016

build: hg19

display range: chr2:217502465–217552465 [217502465–217552465]

hilite range: 0 – 0 [ 0 – 0 ]

reference SNP: chr2:217527465

number of SNPs plotted: 120

min P.value: 9.54E–7 [chr2:217527465]

max P.value: 9.64E–1 [chr2:217520720]

annotation key

|                |   |
|----------------|---|
| framestop      | ○ |
| splice         | □ |
| nonsyn         | ◇ |
| coding         | △ |
| utr            | ▽ |
| tfbscons       | × |
| mcs44placental | ⊠ |
| no annotation  | * |
| none           | ⊕ |

# rs853807

Plotted SNPs |||| ||| ||||| | ||||| | | ||||| | |||| | ||||| ||||| ||||| ||||| ||||| ||||| |||||

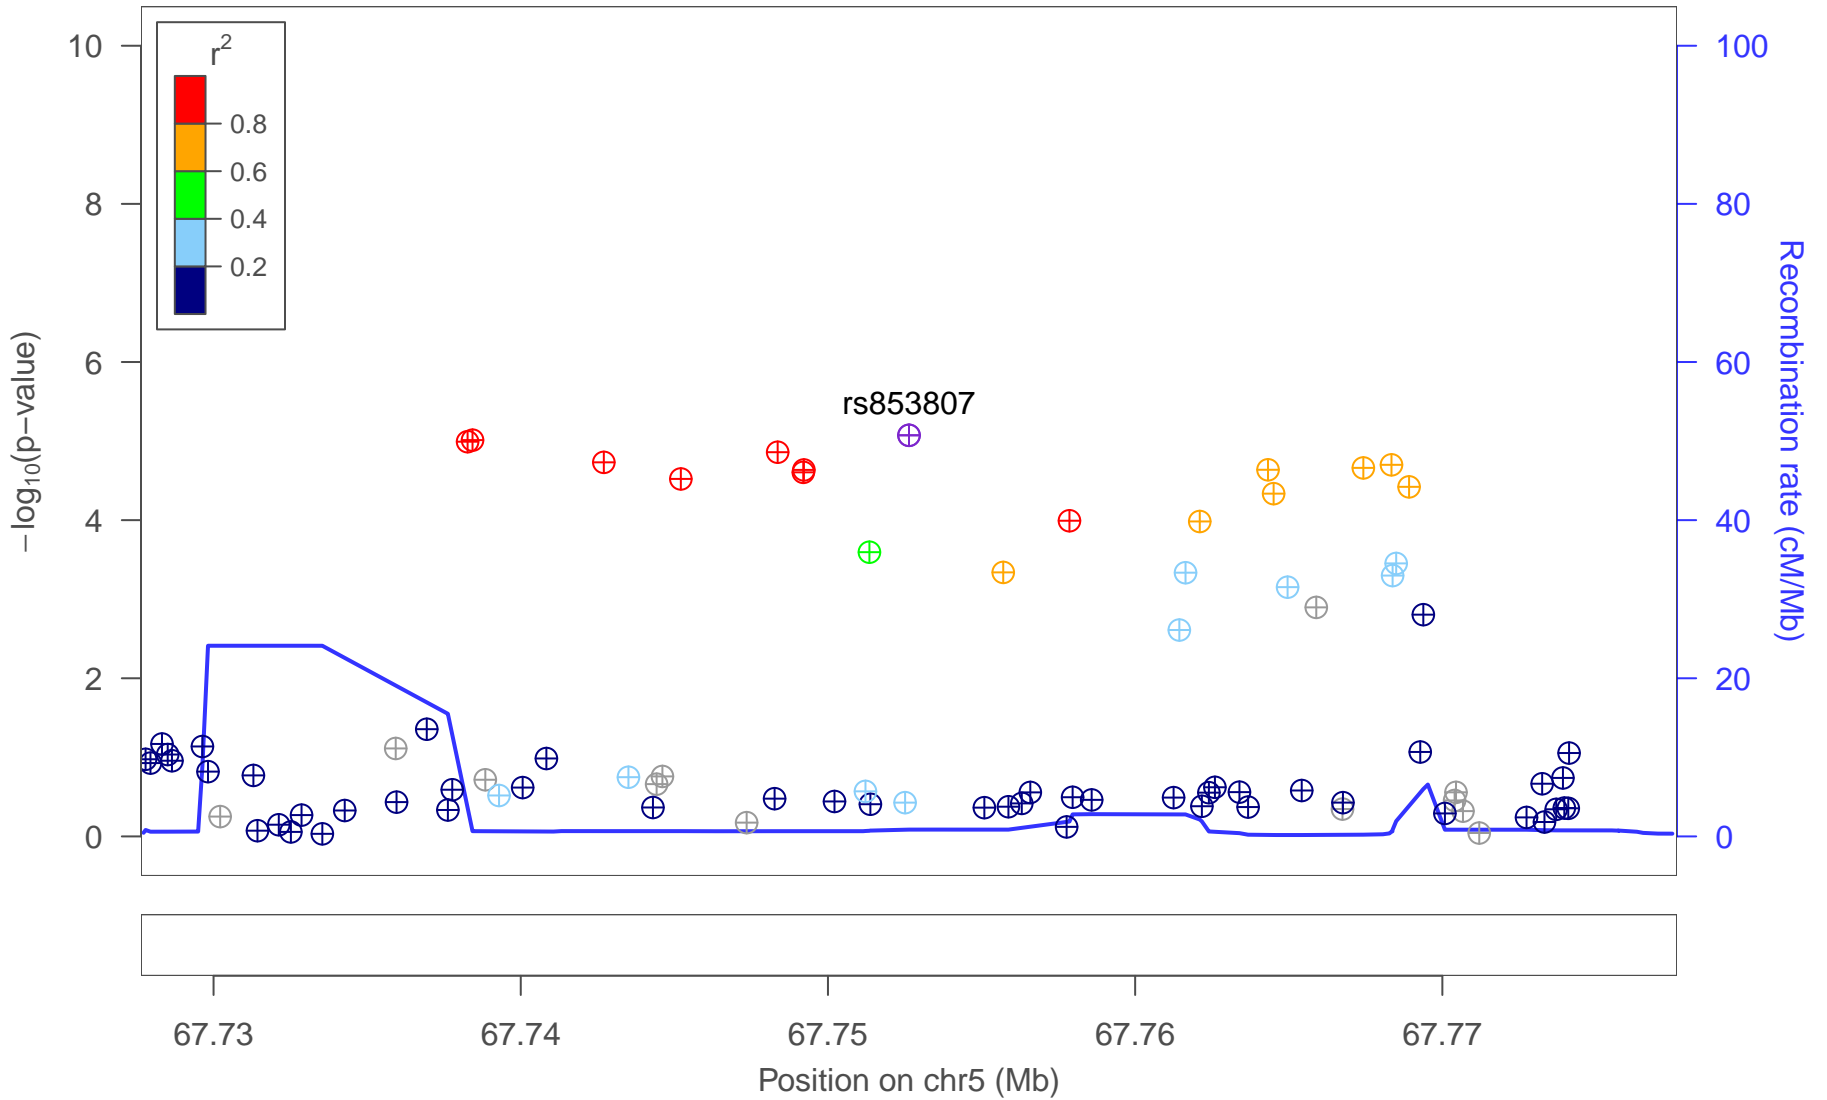

date: Wed Oct 19 17:12:58 2016

build: hg19

display range: chr5:67727638–67777638 [67727638–67777638]

hilite range: 0 – 0 [ 0 – 0 ]

reference SNP: chr5:67752638

number of SNPs plotted: 89

min P.value: 8.45E–6 [chr5:67752638]

max P.value: 9.27E–1 [chr5:67733541]

annotation key

|                |   |
|----------------|---|
| framestop      | ○ |
| splice         | □ |
| nonsyn         | ◇ |
| coding         | △ |
| utr            | ▽ |
| tfbscons       | × |
| mcs44placental | ⊠ |
| no annotation  | * |
| none           | ⊕ |

# rs57836066

Plotted SNPs

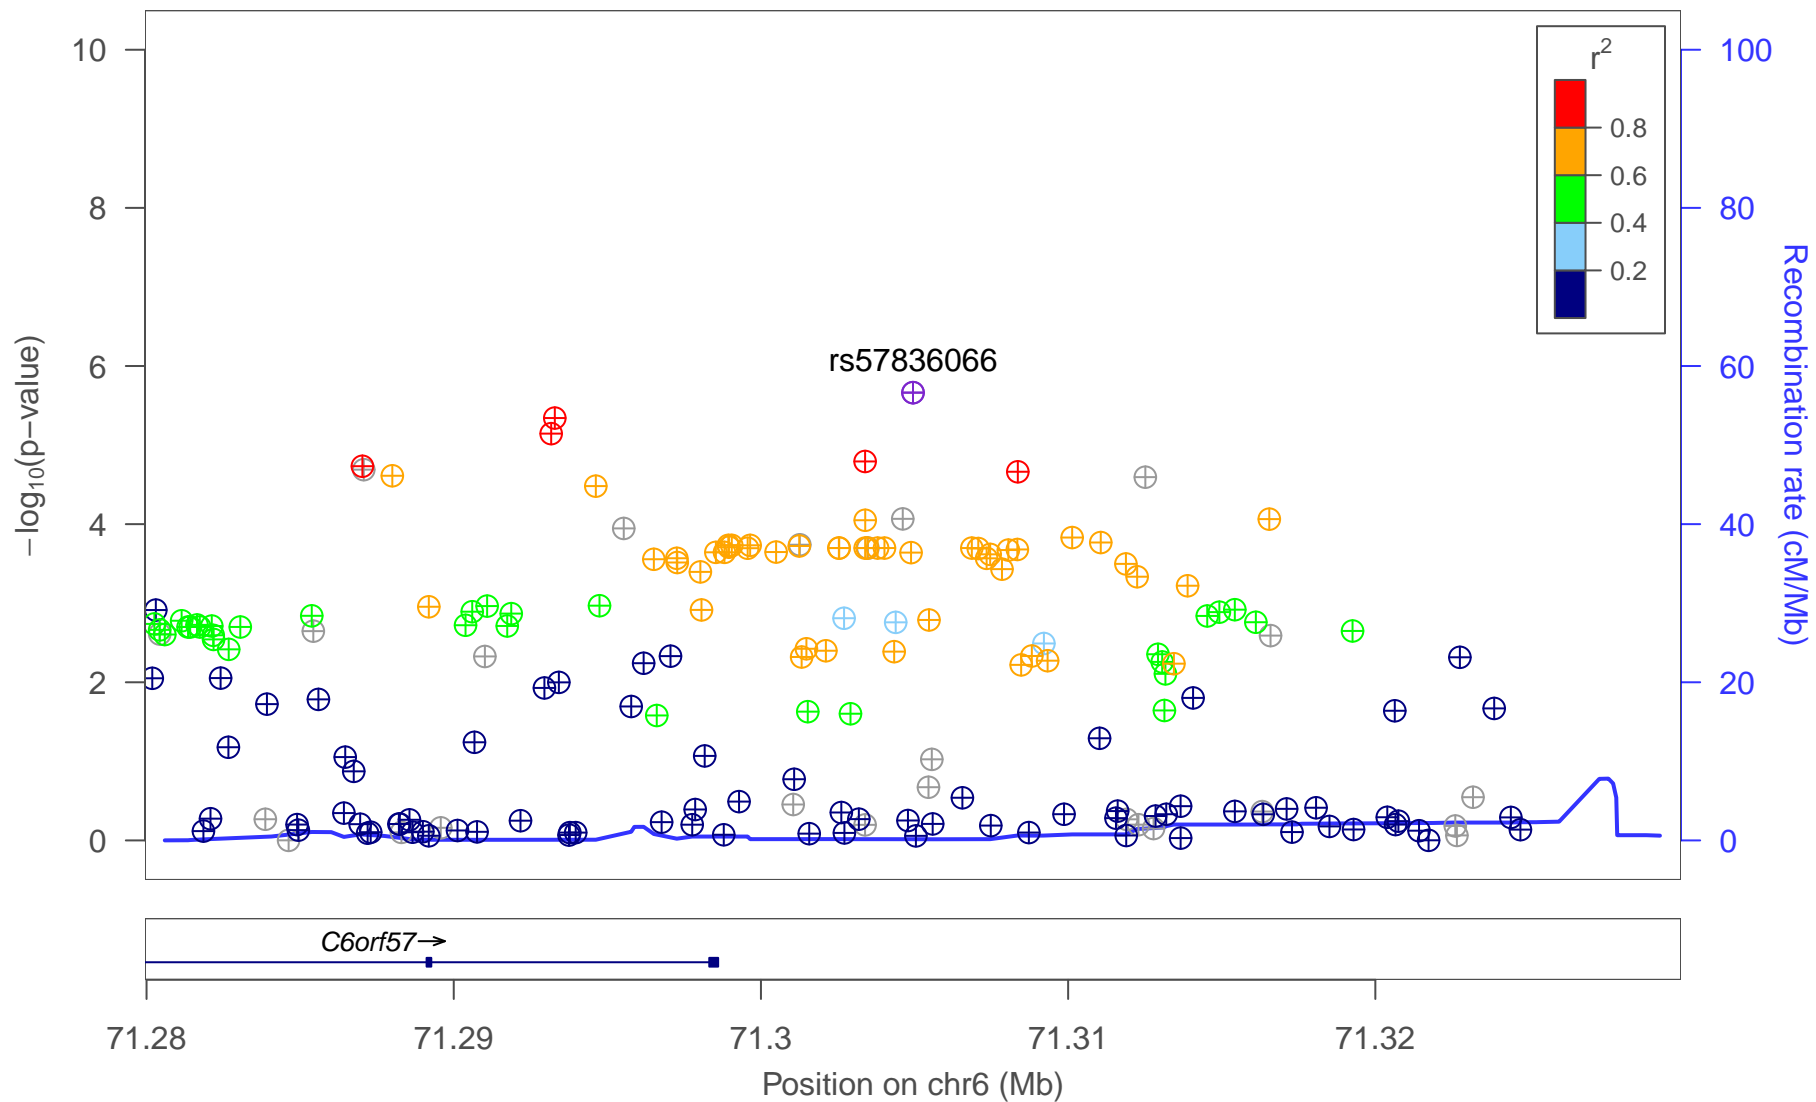

date: Wed Oct 19 17:35:45 2016

build: hg19

display range: chr6:71279950–71329950 [71279950–71329950]

hilite range: 0 – 0 [ 0 – 0 ]

reference SNP: chr6:71304950

number of SNPs plotted: 192

min P.value: 2.17E–6 [chr6:71304950]

max P.value: 9.98E–1 [chr6:71284625]

annotation key

|                |   |
|----------------|---|
| framestop      | ○ |
| splice         | □ |
| nonsyn         | ◇ |
| coding         | ▲ |
| utr            | ▼ |
| tfbscons       | × |
| mcs44placental | ⊠ |
| no annotation  | * |
| none           | ⊕ |

# rs2373391

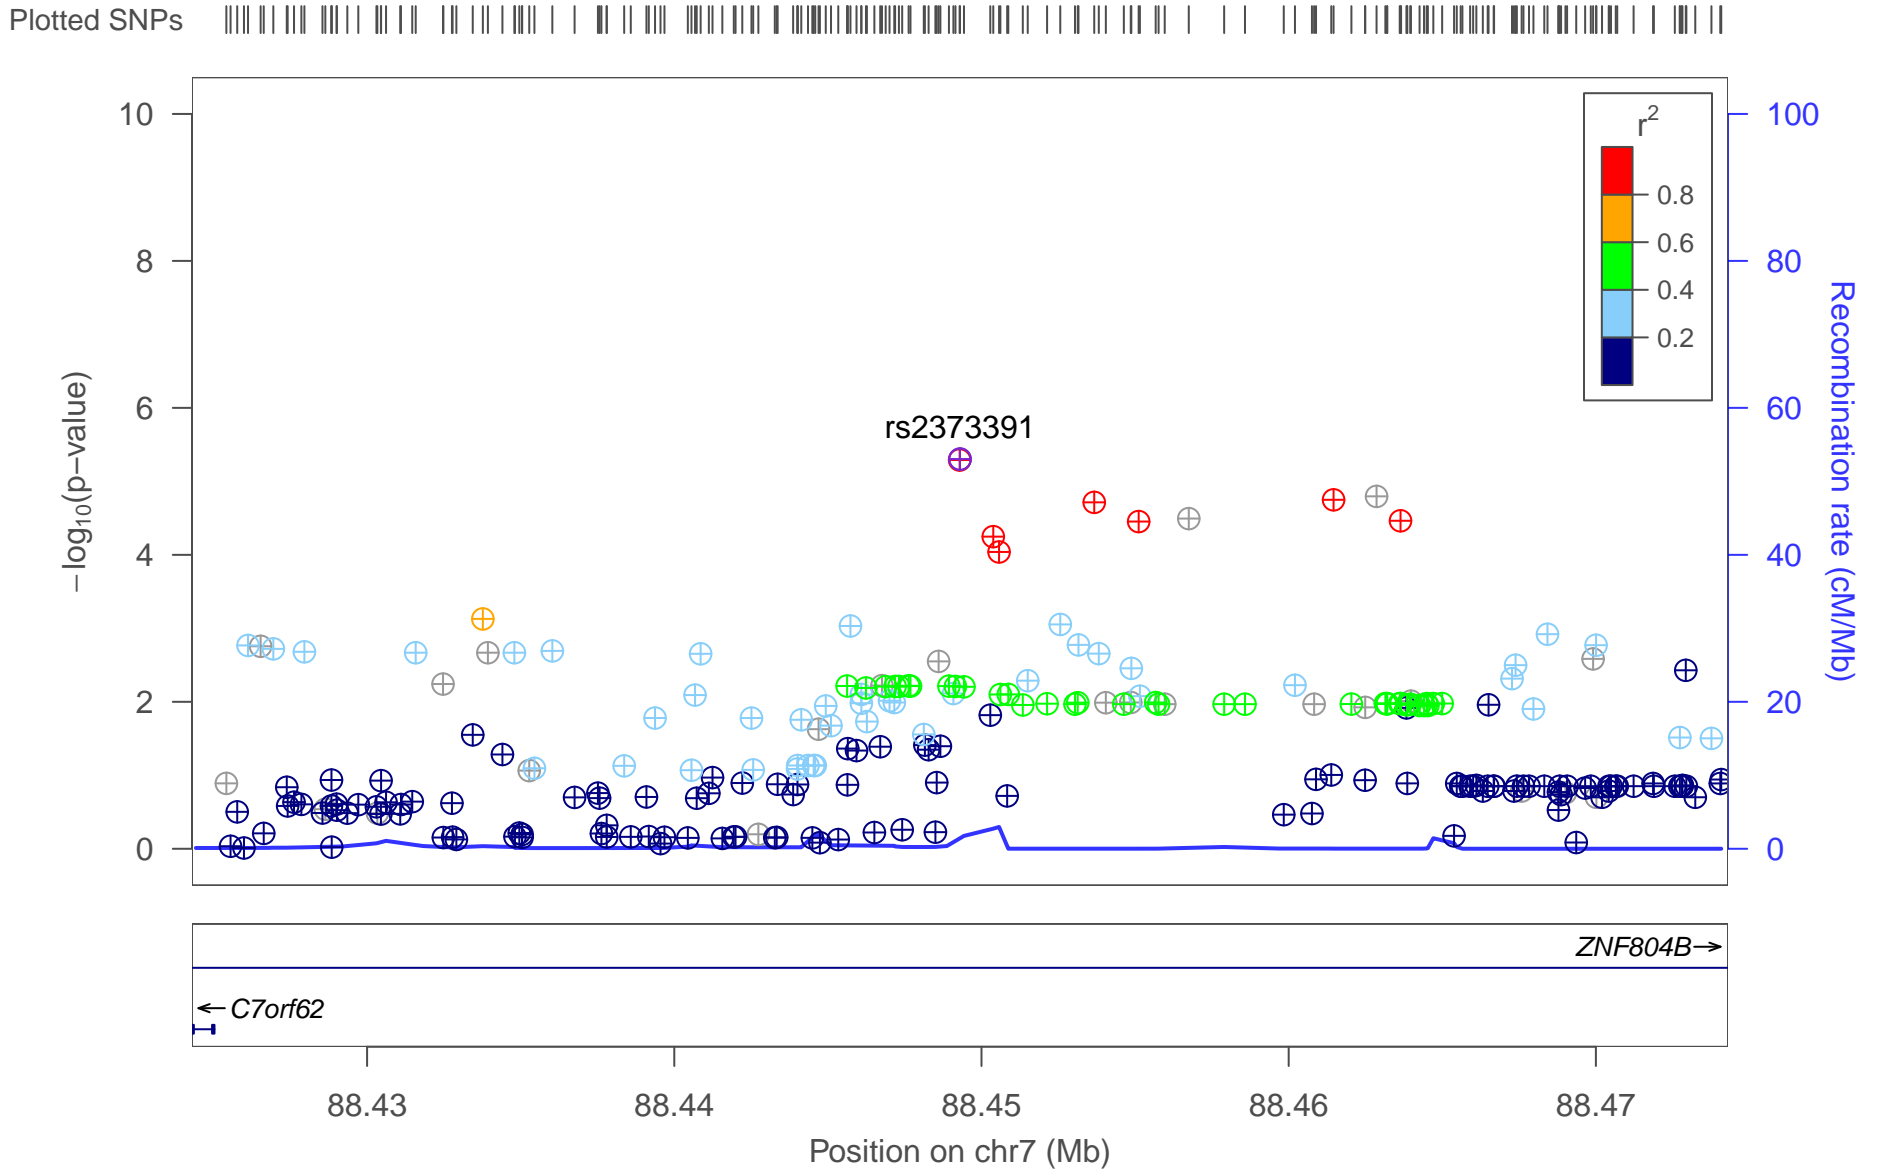

date: Wed Oct 19 17:44:27 2016

build: hg19

display range: chr7:88424300–88474300 [88424300–88474300]

hilite range: 0 – 0 [ 0 – 0 ]

reference SNP: chr7:88449300

number of SNPs plotted: 235

min P.value: 4.98E–6 [chr7:88449300]

max P.value: 9.75E–1 [chr7:88425992]

annotation key

|                |   |
|----------------|---|
| framestop      | ○ |
| splice         | □ |
| nonsyn         | ◇ |
| coding         | ▲ |
| utr            | ▼ |
| tfbscons       | × |
| mcs44placental | ⊠ |
| no annotation  | * |
| none           | ⊕ |



# rs7945369

Plotted SNPs ||

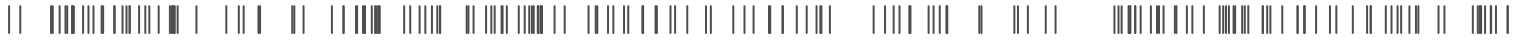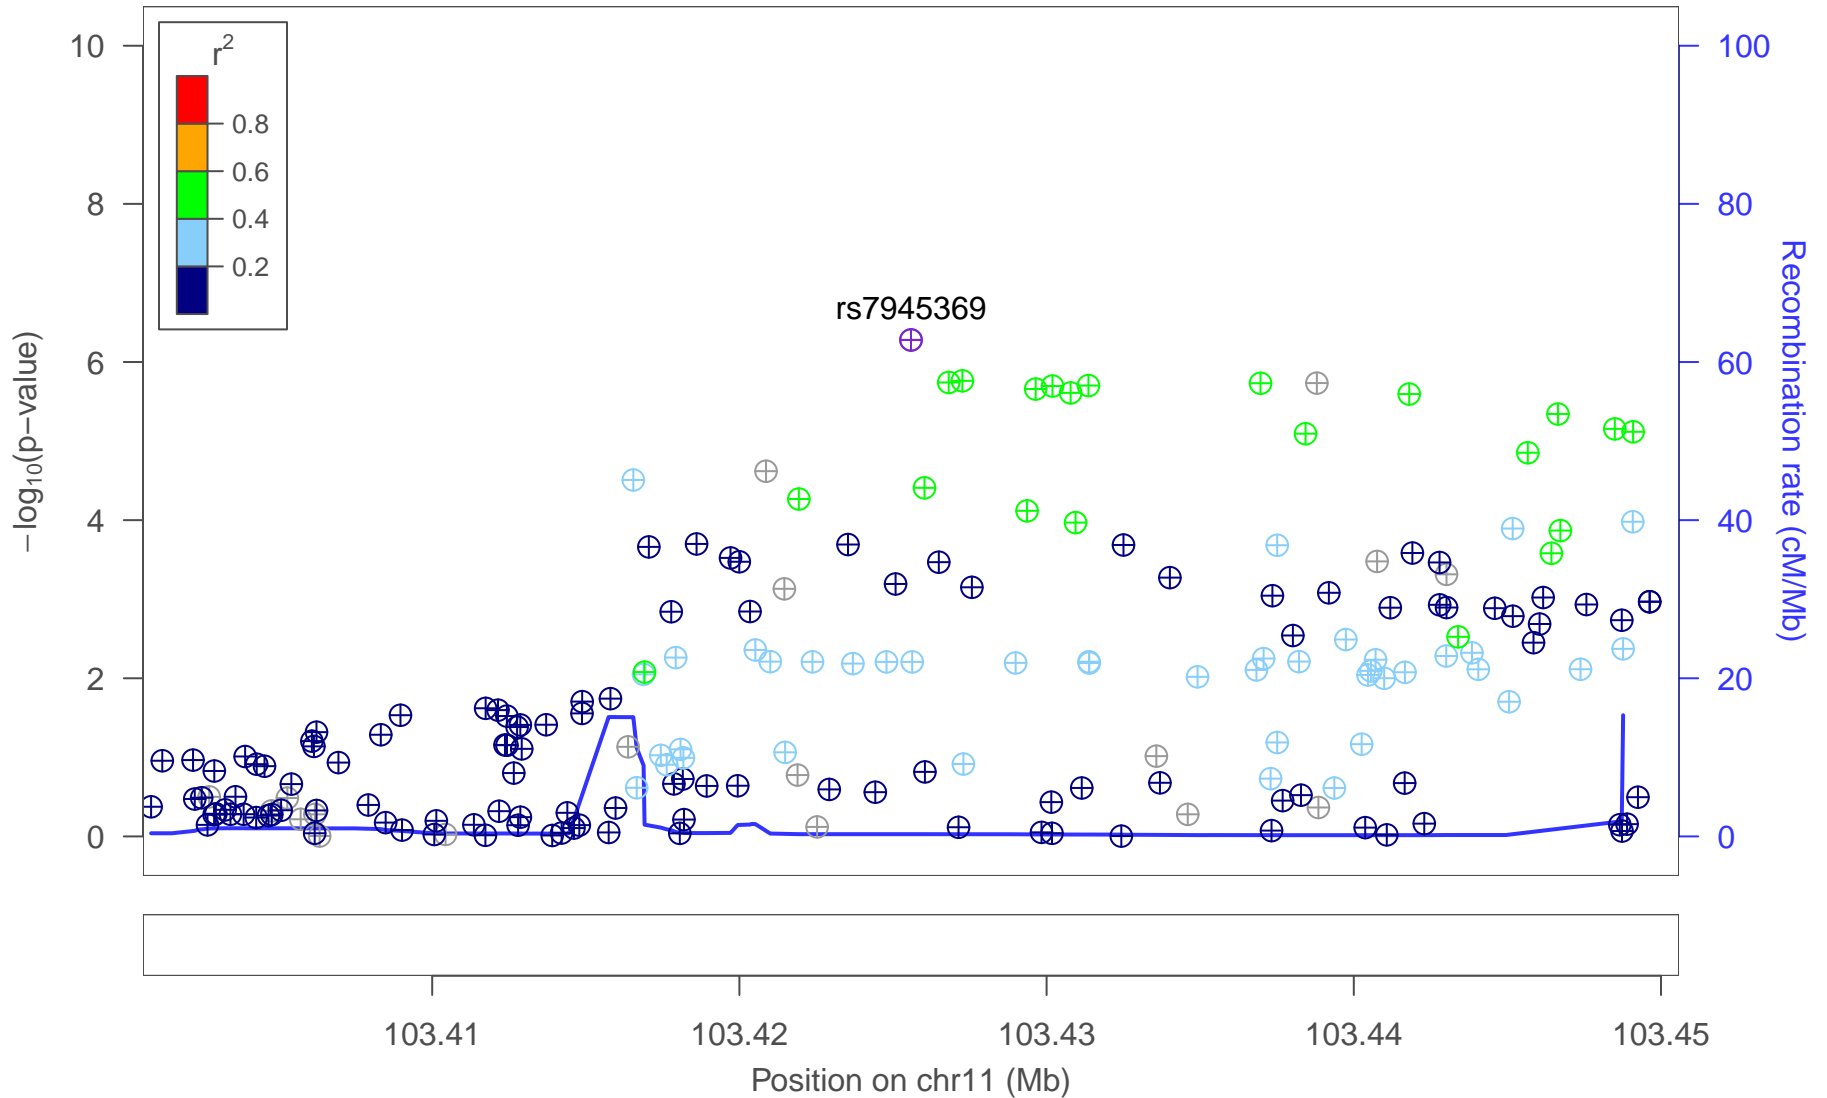

date: Wed Oct 19 18:02:12 2016

build: hg19

display range: chr11:103400586–103450586 [103400586–103450586]

hilite range: 0 – 0 [ 0 – 0 ]

reference SNP: chr11:103425586

number of SNPs plotted: 198

min P.value: 5.26E–7 [chr11:103425586]

max P.value: 9.9E–1 [chr11:103432432]

annotation key

|                |   |
|----------------|---|
| framestop      | ○ |
| splice         | □ |
| nonsyn         | ◇ |
| coding         | △ |
| utr            | ▽ |
| tfbscons       | × |
| mcs44placental | ⊠ |
| no annotation  | * |
| none           | ⊕ |
