# Supplementary material for: Genome-wide association study of pigmentary traits (skin and iris color) in individuals of East Asian ancestry
Source: PubMed Central journal article supplement (PMC5671666; doi:10.7717/peerj.3951), 2017-11-02
Supplement: peerj-05-3951-s008.pdf [file peerj-05-3951-s008.pdf]

# rs6664080

Plotted SNPs

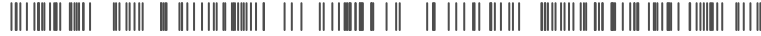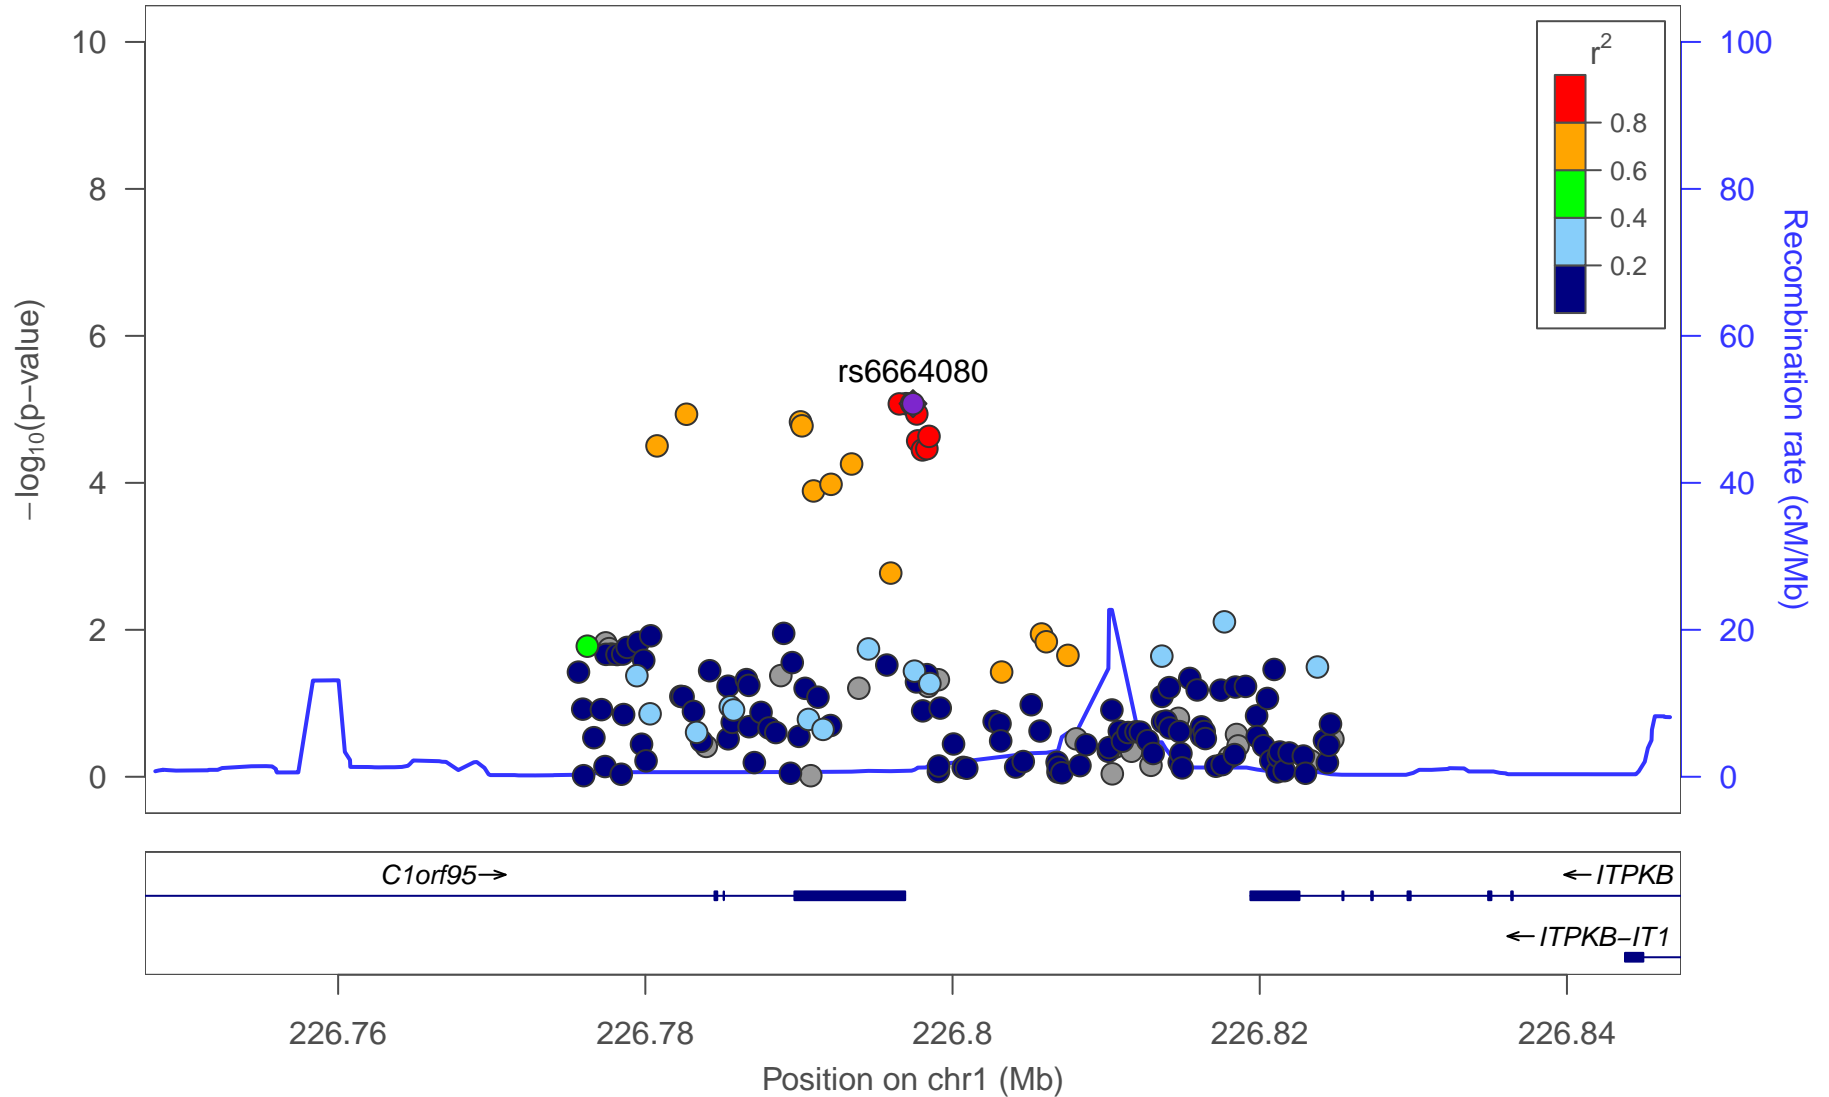

date: Thu Jul 27 23:57:52 2017

build: hg19

display range: chr1:226747426–226847426 [226747426–226847426]

hilite range: 0 – 0 [ 0 – 0 ]

reference SNP: chr1:226797426

number of SNPs plotted: 166

min P.value: 8.36E–6 [chr1:226796968]

max P.value: 9.66E–1 [chr1:226790769]

# rs4425211

Plotted SNPs

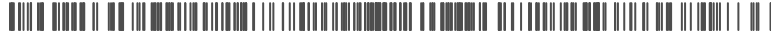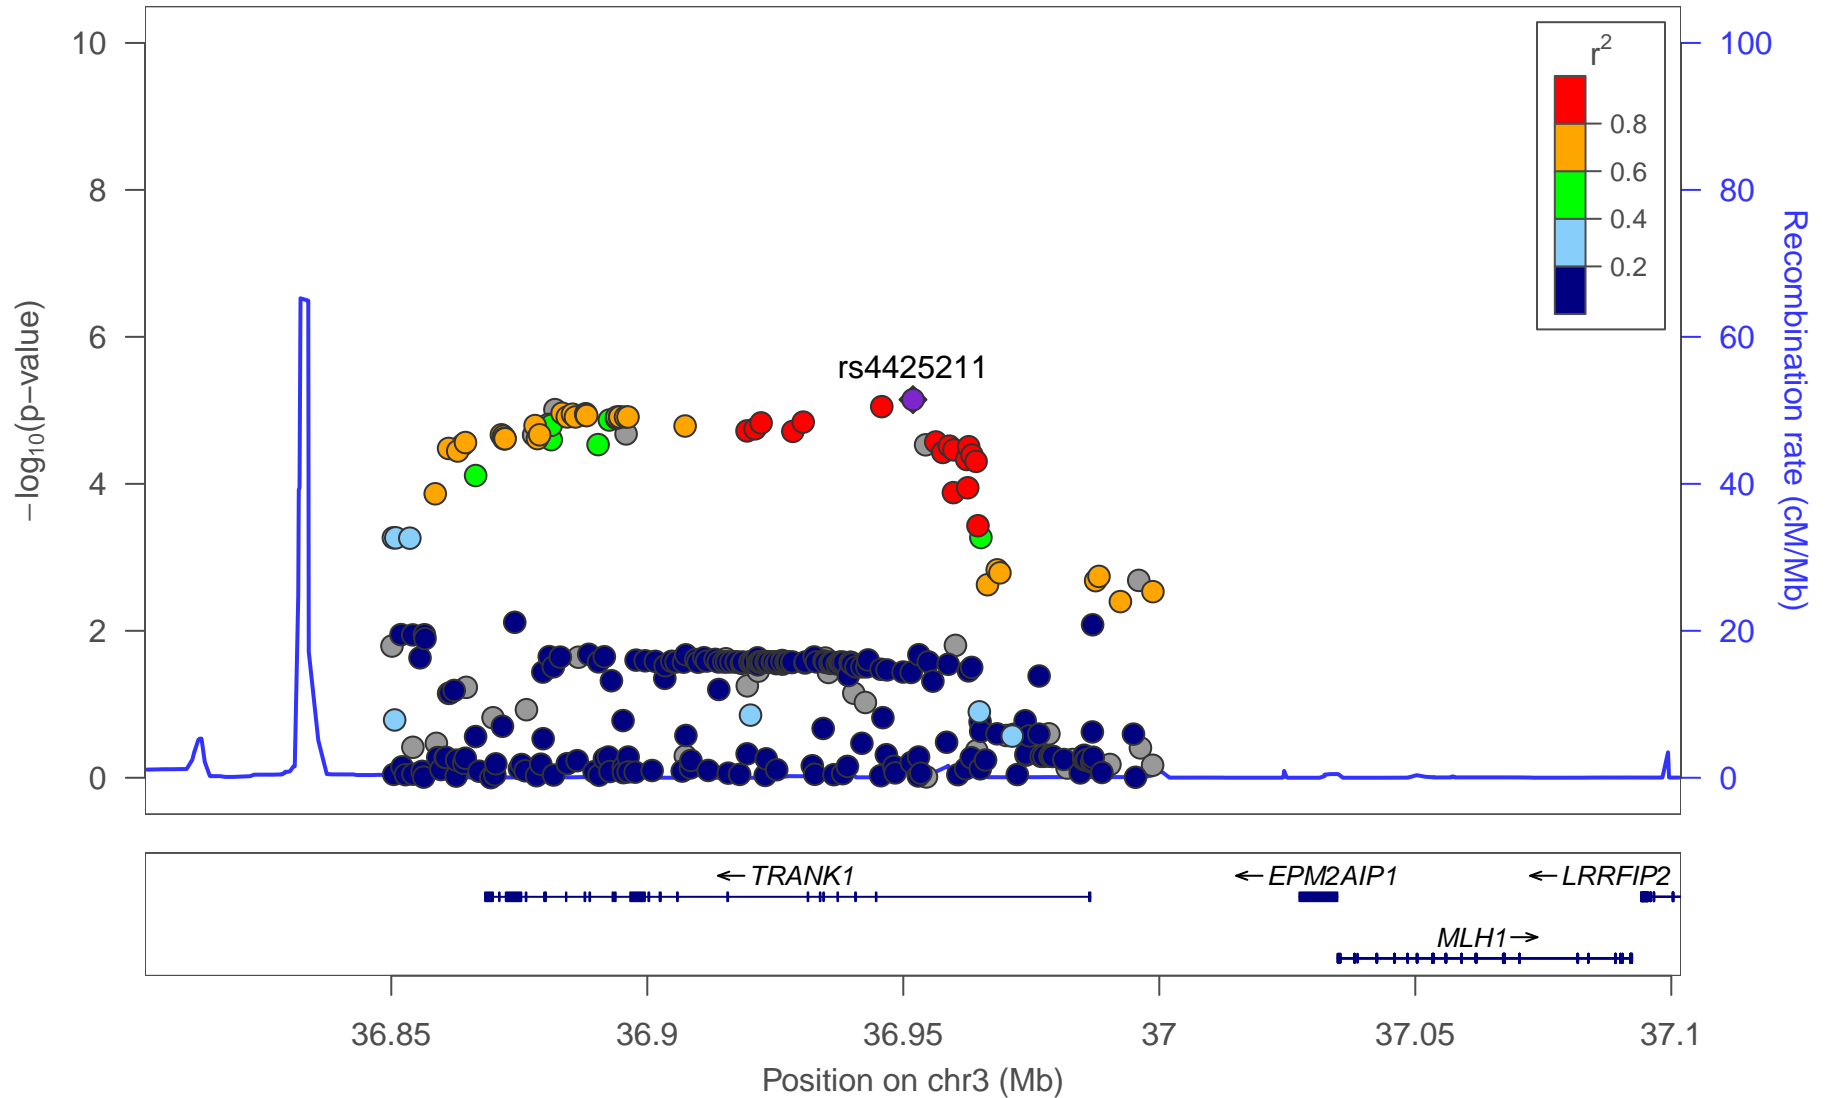

date: Thu Jul 27 23:48:08 2017

build: hg19

display range: chr3:36801898–37101898 [36801898–37101898]

hilite range: 0 – 0 [ 0 – 0 ]

reference SNP: chr3:36951898

number of SNPs plotted: 304

min P.value: 7.14E–6 [chr3:36951898]

max P.value: 9.95E–1 [chr3:36869439]

# rs12501370

Plotted SNPs

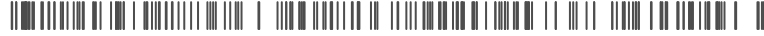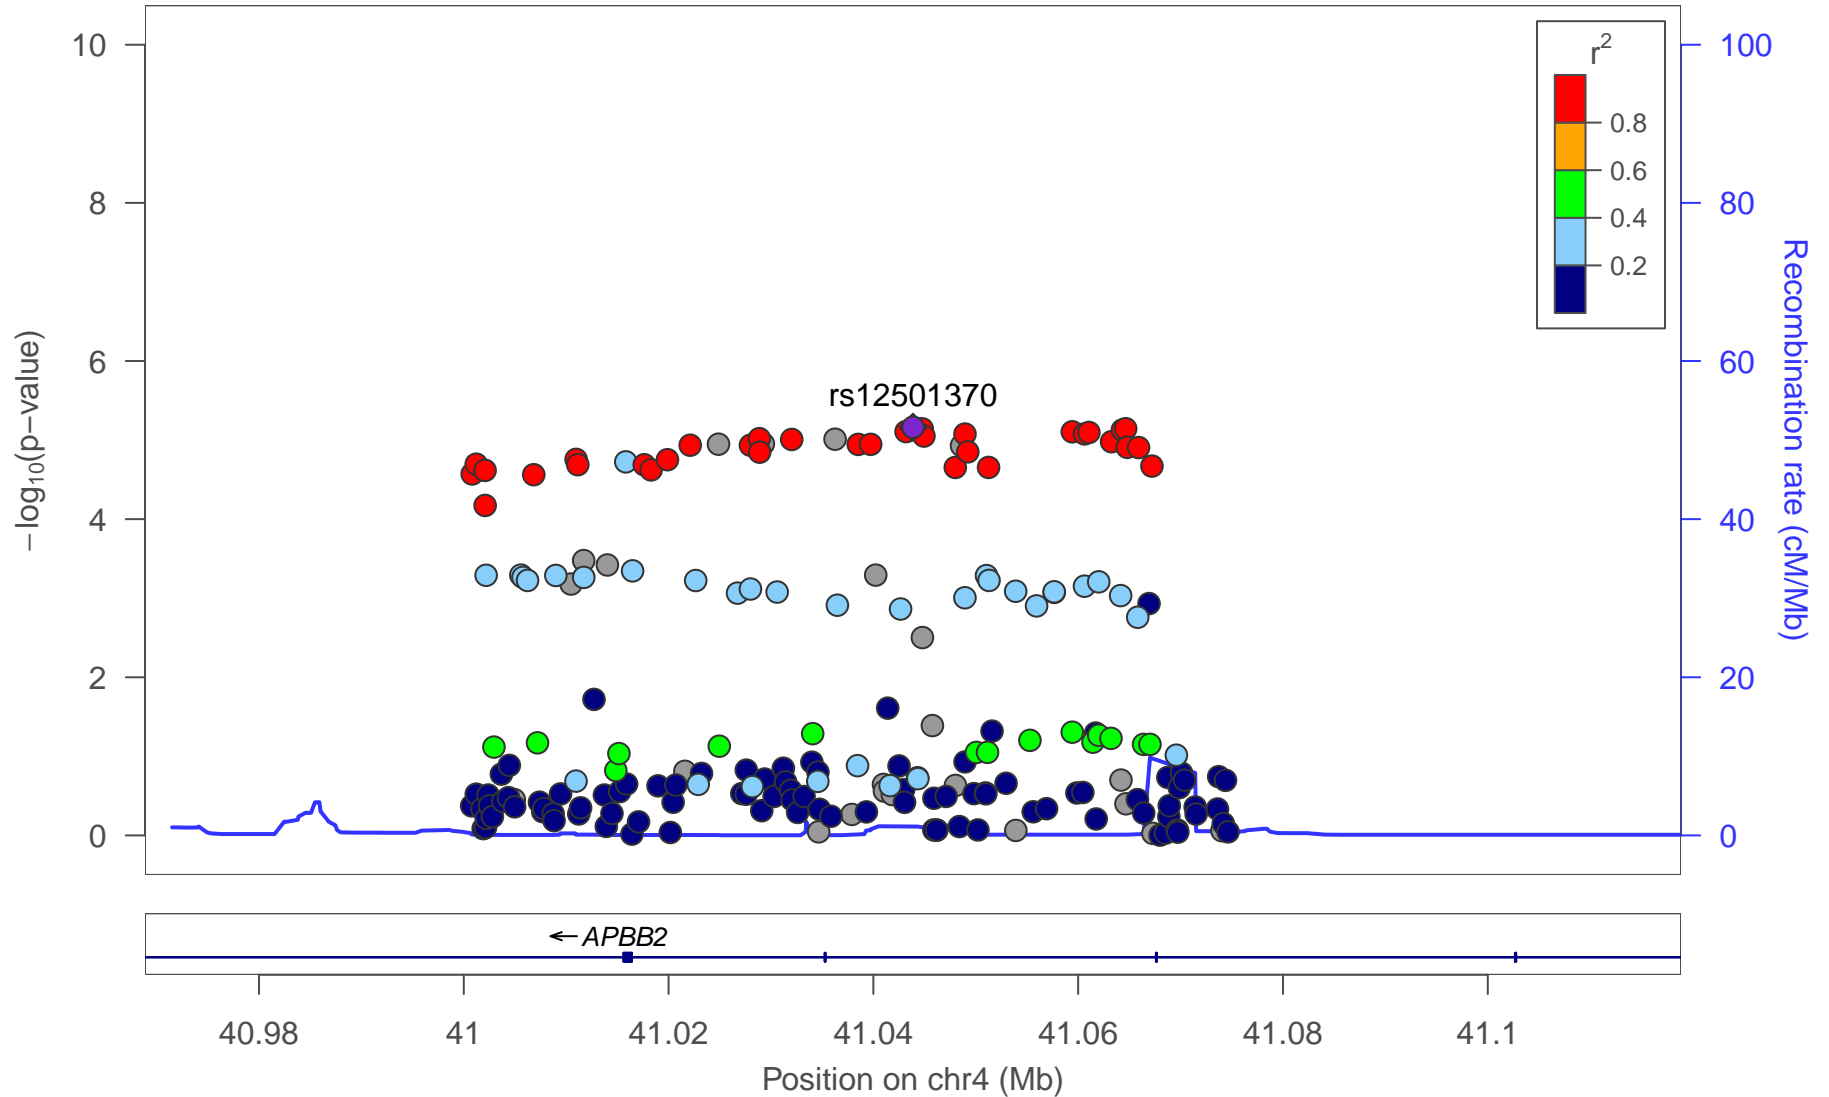

date: Fri Jul 28 00:19:10 2017

build: hg19

display range: chr4:40968870–41118870 [40968870–41118870]

hilite range: 0 – 0 [ 0 – 0 ]

reference SNP: chr4:41043870

number of SNPs plotted: 204

min P.value: 6.89E–6 [chr4:41043870]

max P.value: 9.91E–1 [chr4:41067995]

# rs2658084

Plotted SNPs

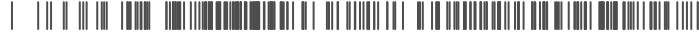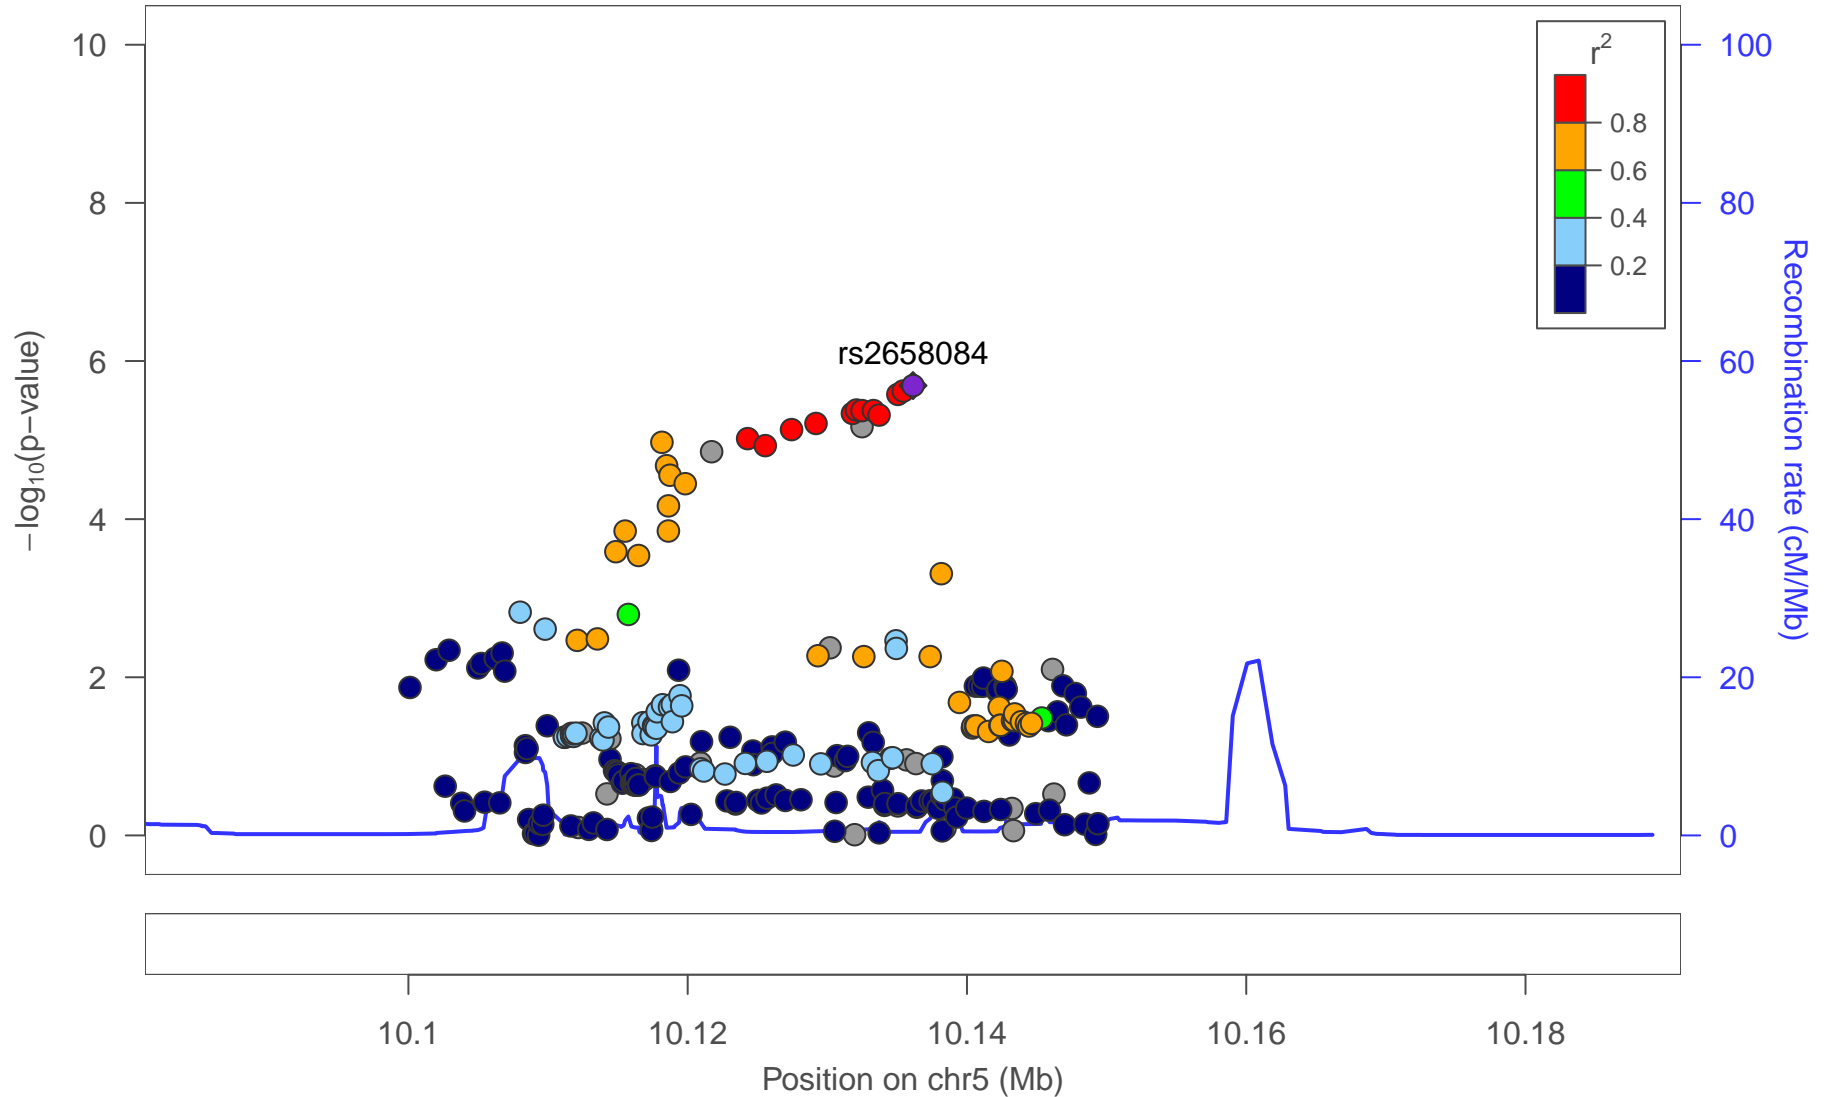

date: Thu Jul 27 23:37:10 2017

build: hg19

display range: chr5:10081135–10191135 [10081135–10191135]

hilite range: 0 – 0 [ 0 – 0 ]

reference SNP: chr5:10136135

number of SNPs plotted: 238

min P.value: 2.05E–6 [chr5:10136135]

max P.value: 9.92E–1 [chr5:10109323]





date: Mon Aug 7 13:42:39 2017

build: hg19

display range: chr5:133377895–133427895 [133377895–133427895]

hilite range: 0 – 0 [ 0 – 0 ]

reference SNP: chr5:133402895

number of SNPs plotted: 110

min p-value: 2E-6 [chr5:133402895]

max p-value: 9.41E-1 [chr5:133385389]



date: Mon Aug 7 13:45:33 2017

build: hg19

display range: chr6:25480617–25530617 [25480617–25530617]

hilite range: 0 – 0 [ 0 – 0 ]

reference SNP: chr6:25505617

number of SNPs plotted: 207

min p-value: 4.38E–6 [chr6:25505617]

max p-value: 9.99E–1 [chr6:25504357]

# rs9373973

Plotted SNPs

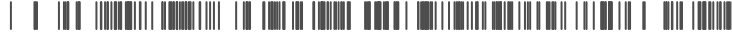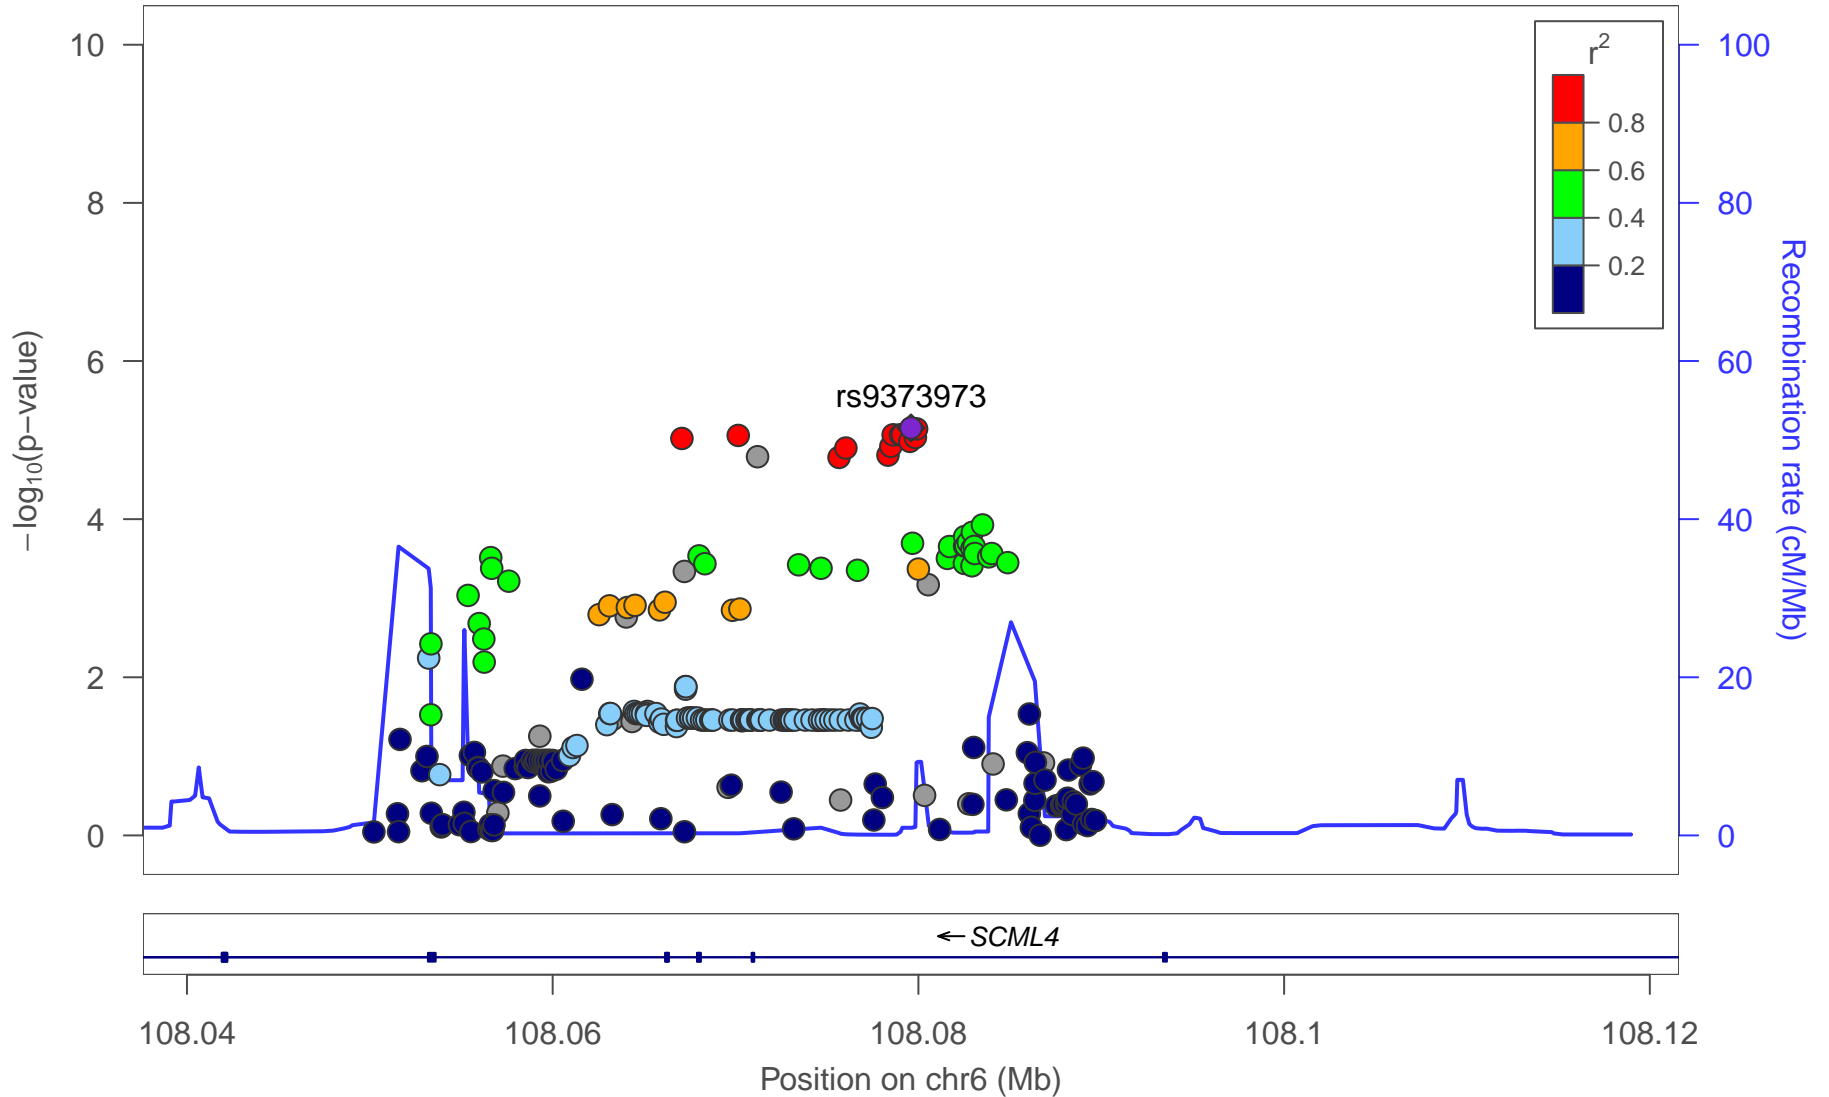

date: Fri Jul 28 00:10:42 2017

build: hg19

display range: chr6:108037595–108121595 [108037595–108121595]

hilite range: 0 – 0 [ 0 – 0 ]

reference SNP: chr6:108079595

number of SNPs plotted: 252

min P.value: 7.02E–6 [chr6:108079595]

max P.value: 9.93E–1 [chr6:108086659]

# rs145048184

Plotted SNPs

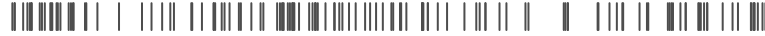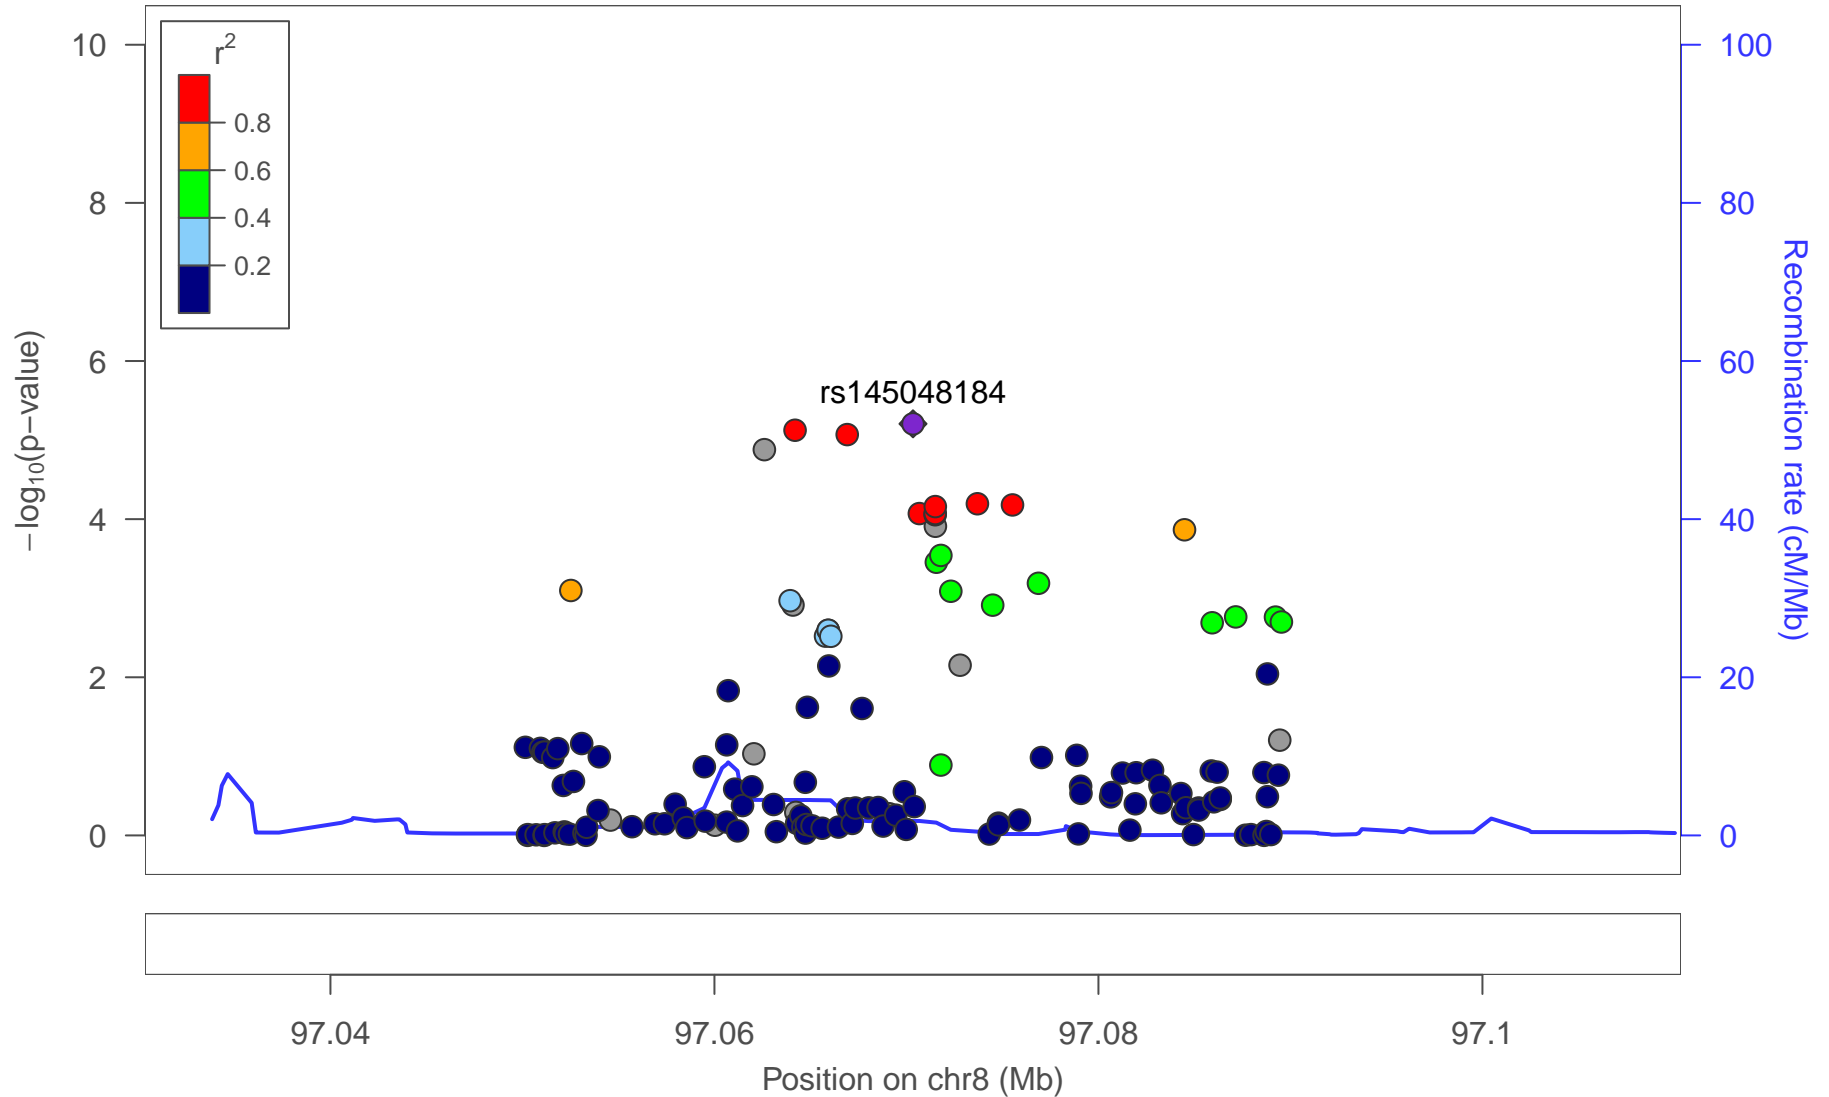

date: Fri Jul 28 00:44:54 2017

build: hg19

display range: chr8:97030341–97110341 [97030341–97110341]

hilite range: 0 – 0 [ 0 – 0 ]

reference SNP: chr8:97070341

number of SNPs plotted: 137

min P.value: 6.23E–6 [chr8:97070341]

max P.value: 9.99E–1 [chr8:97051128]



# rs610106

Plotted SNPs

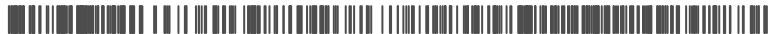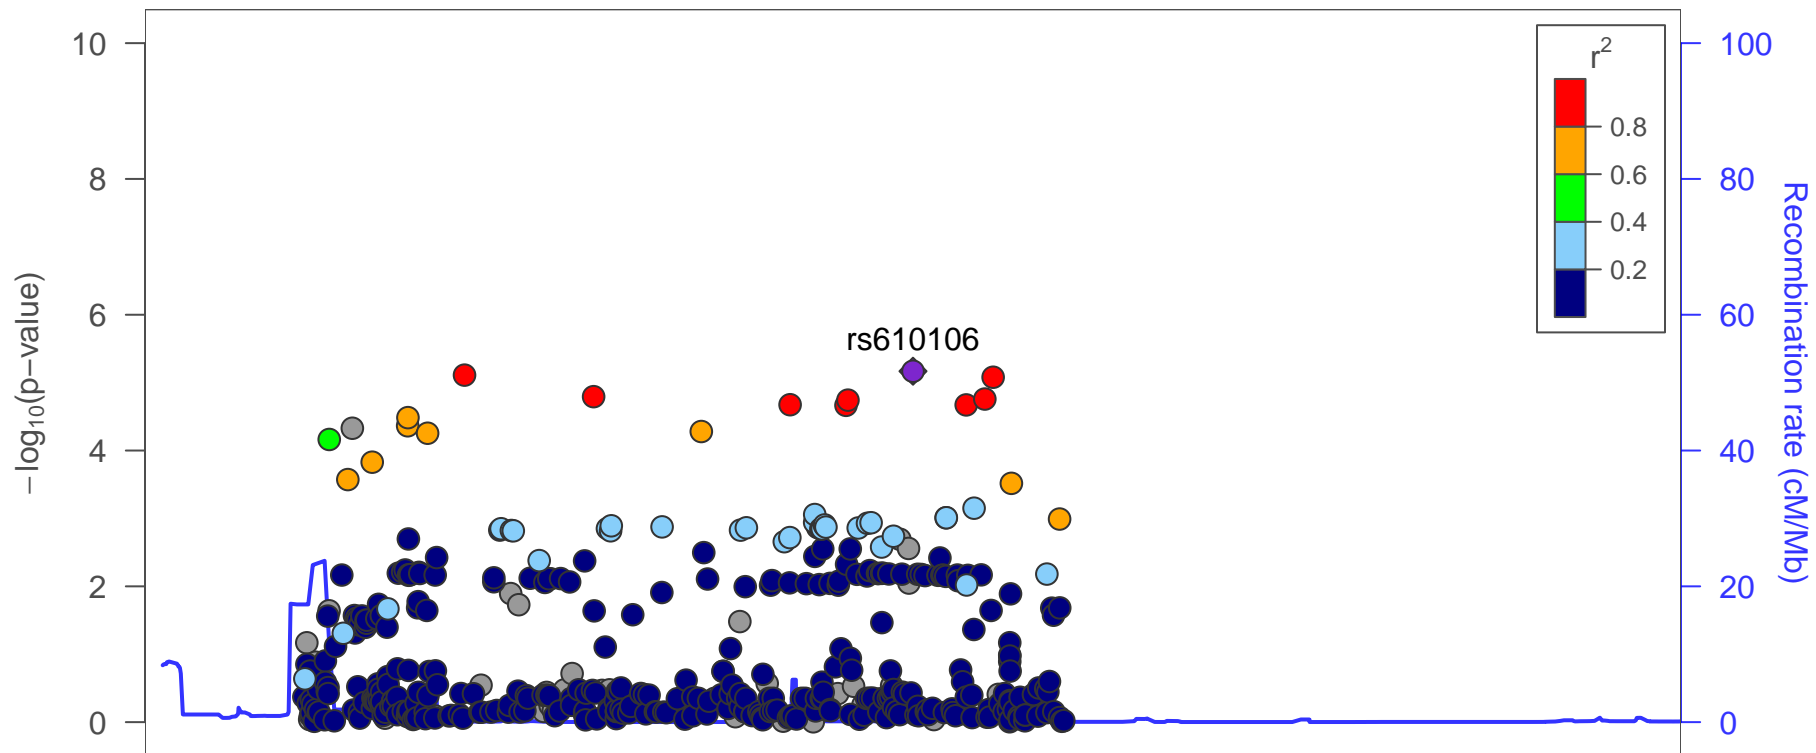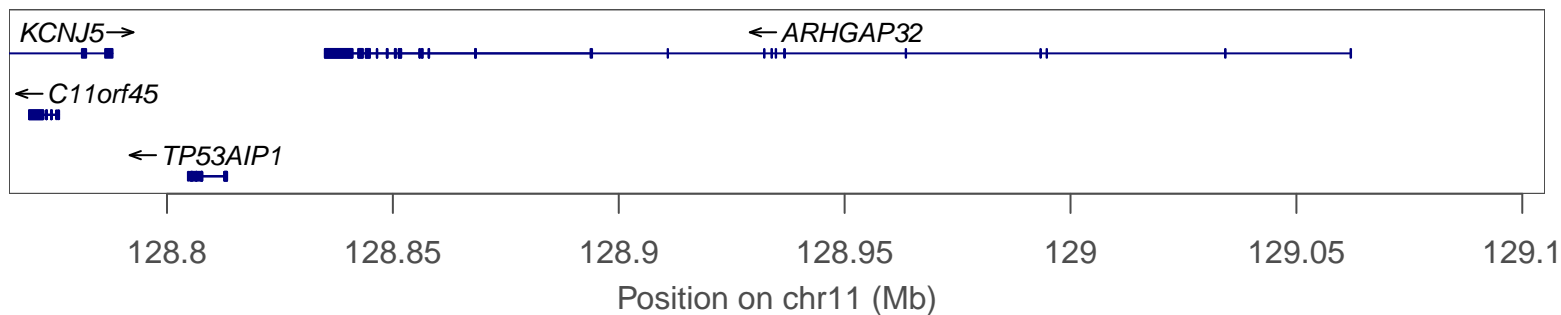

date: Wed Jul 26 05:06:53 2017

build: hg19

display range: chr11:128765028–129105028 [128765028–129105028]

hilite range: 0 – 0 [ 0 – 0 ]

reference SNP: chr11:128935028

number of SNPs plotted: 435

min P.value: 6.79E–6 [chr11:128935028]

max P.value: 9.88E–1 [chr11:128912952]

# rs249625

Plotted SNPs

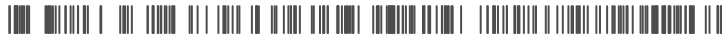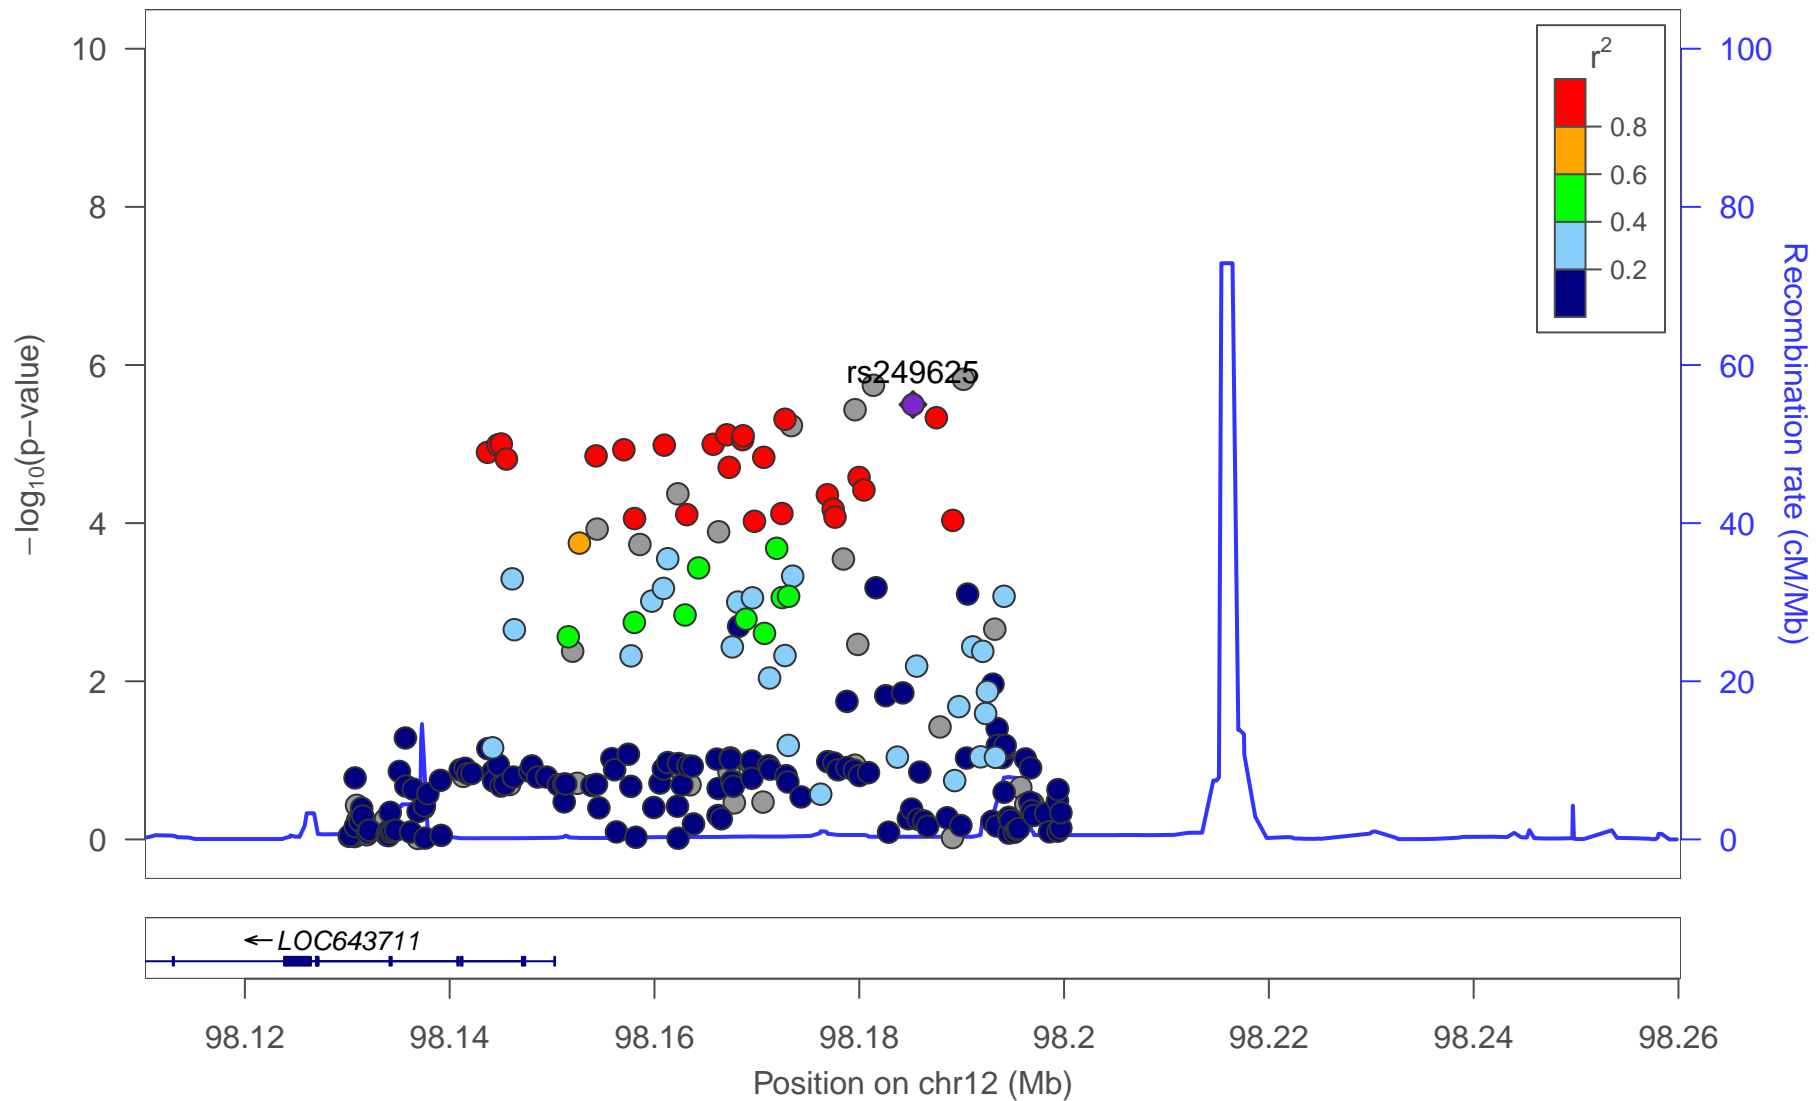

date: Thu Jul 27 23:28:54 2017

build: hg19

display range: chr12:98110248–98260248 [98110248–98260248]

hilite range: 0 – 0 [ 0 – 0 ]

reference SNP: chr12:98185248

number of SNPs plotted: 231

min P.value: 1.51E–6 [chr12:98190174]

max P.value: 9.7E–1 [chr12:98136905]

# rs76930569

Plotted SNPs

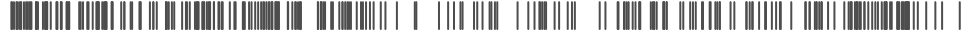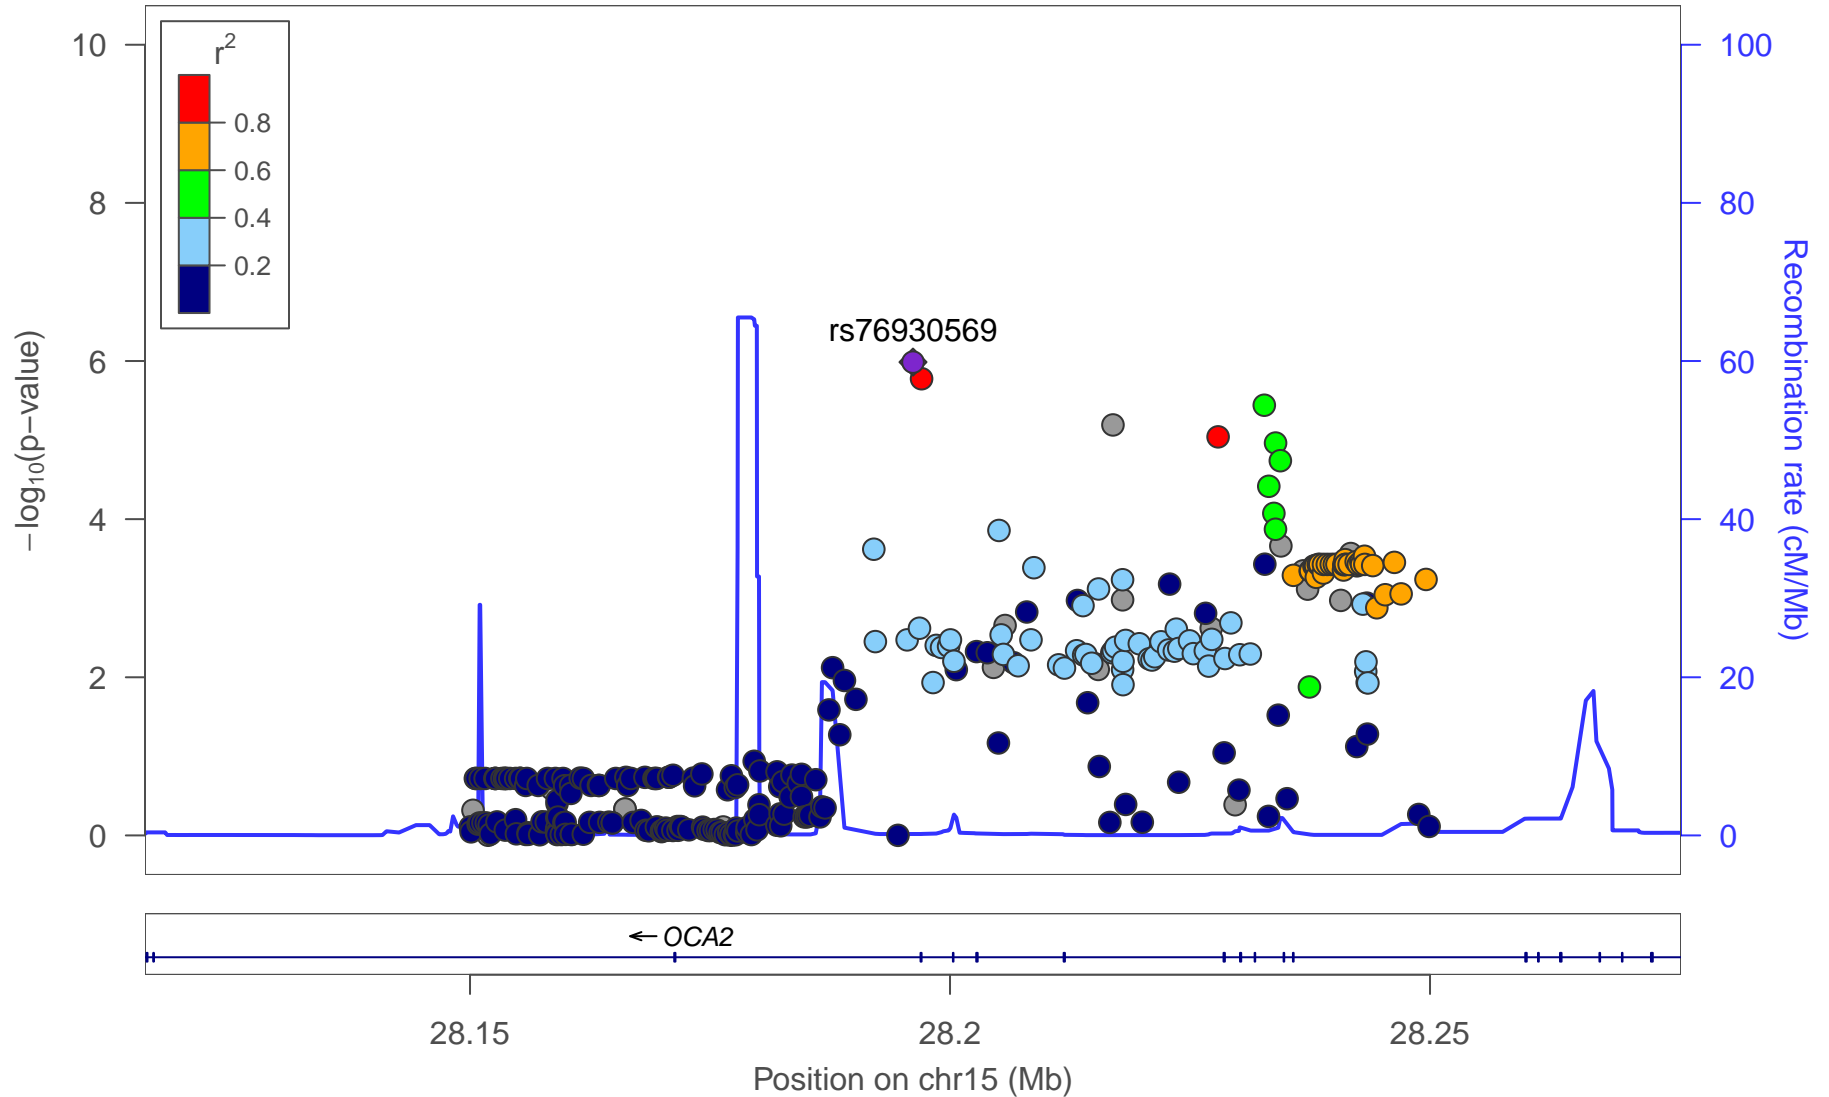

date: Fri Jul 28 00:34:11 2017

build: hg19

display range: chr15:28116145–28276145 [28116145–28276145]

hilite range: 0 – 0 [ 0 – 0 ]

reference SNP: chr15:28196145

number of SNPs plotted: 303

min P.value: 1.03E–6 [chr15:28196145]

max P.value: 9.97E–1 [chr15:28194580]

# rs75161997

Plotted SNPs

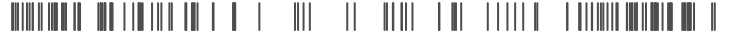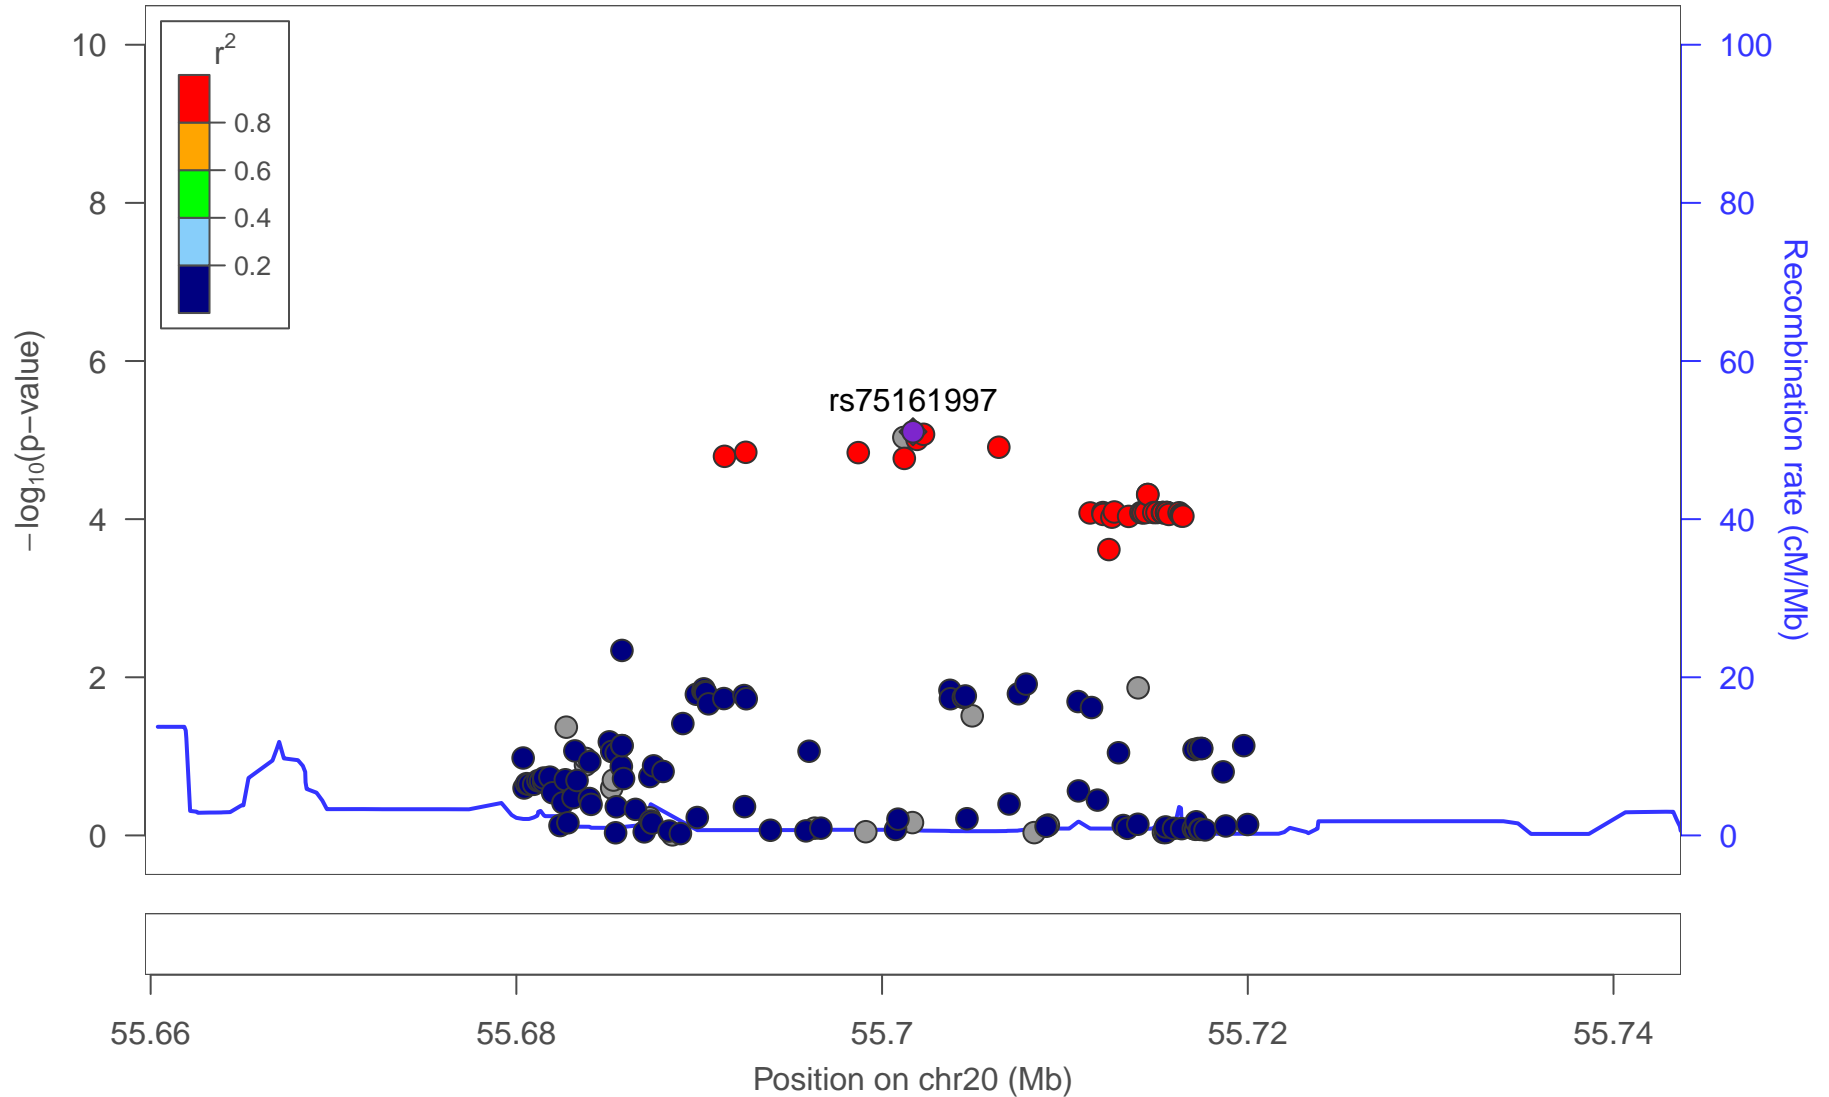

date: Fri Jul 28 00:24:33 2017

build: hg19

display range: chr20:55659691–55743691 [55659691–55743691]

hilite range: 0 – 0 [ 0 – 0 ]

reference SNP: chr20:55701691

number of SNPs plotted: 144

min P.value: 7.84E–6 [chr20:55701691]

max P.value: 9.82E–1 [chr20:55688533]



# rs8131065

Plotted SNPs

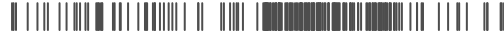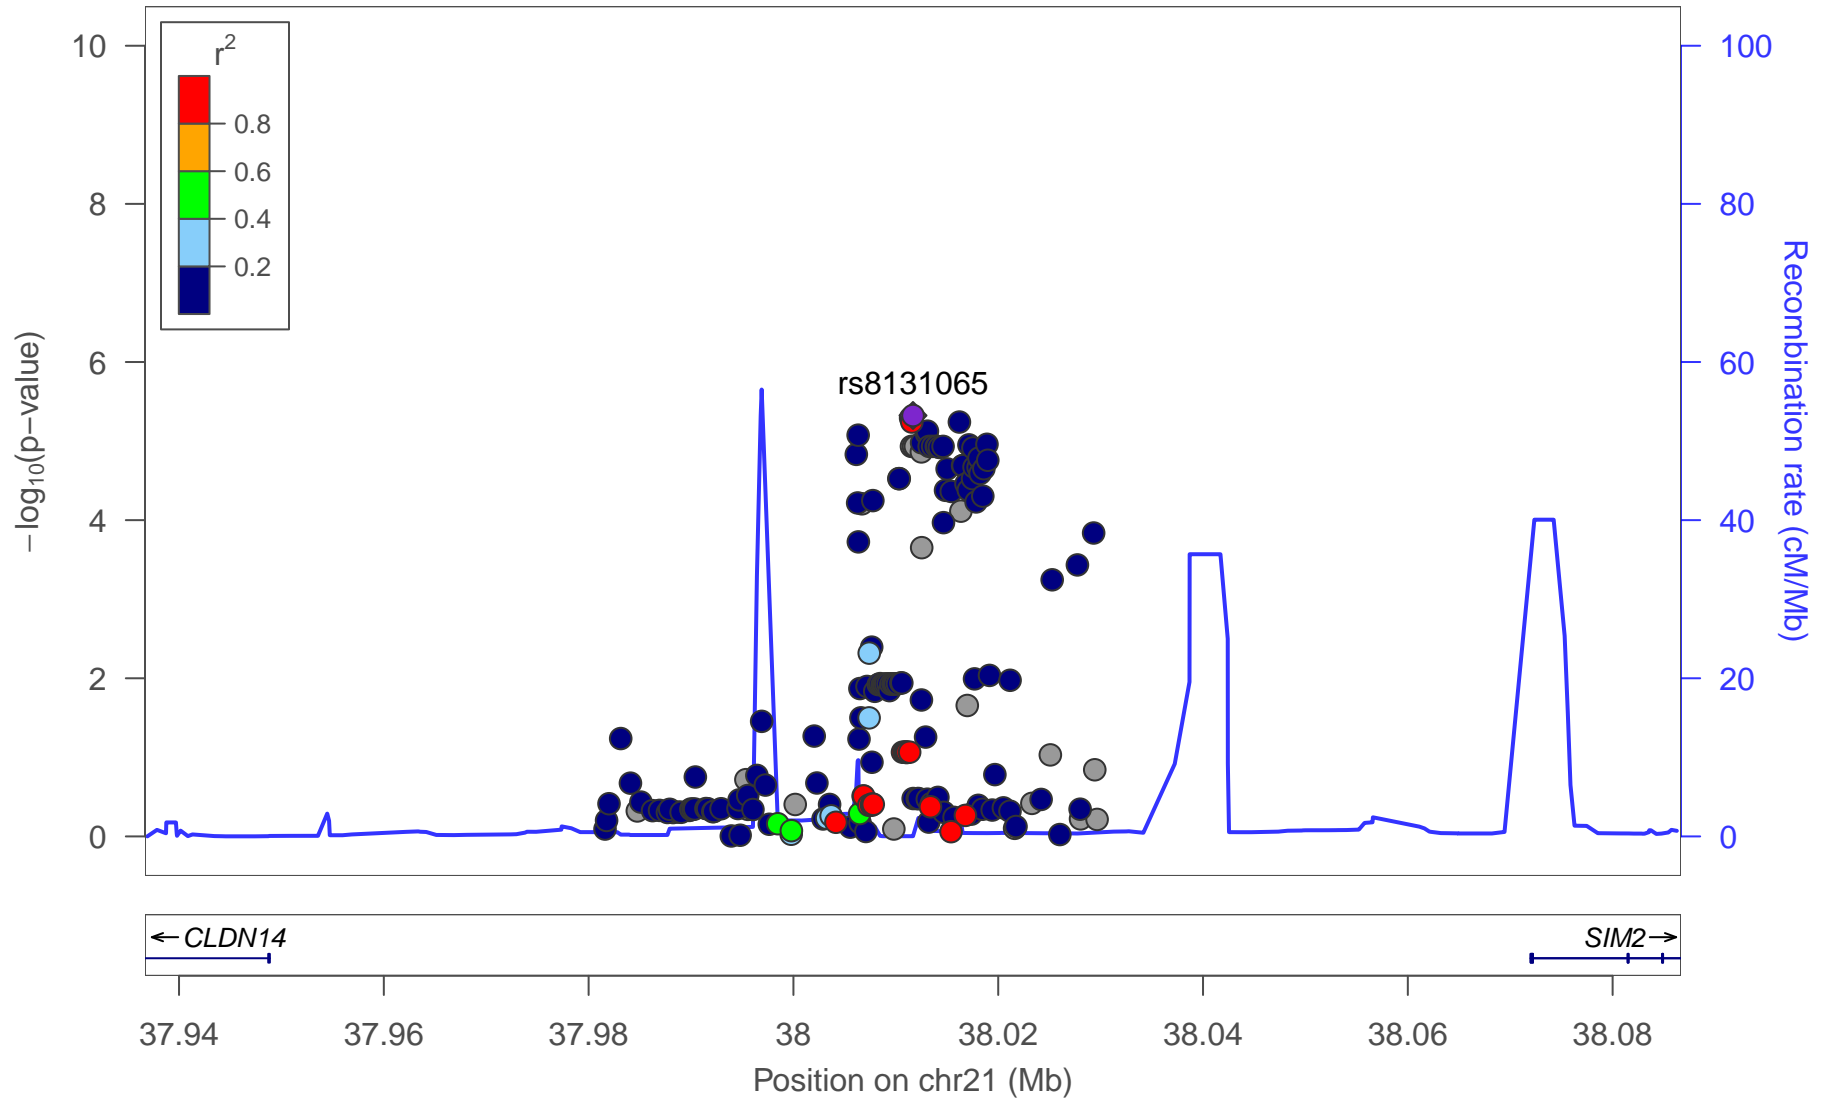

date: Fri Jul 28 00:05:43 2017

build: hg19

display range: chr21:37936676–38086676 [37936676–38086676]

hilite range: 0 – 0 [ 0 – 0 ]

reference SNP: chr21:38011676

number of SNPs plotted: 180

min P.value: 4.75E–6 [chr21:38011676]

max P.value: 9.86E–1 [chr21:37993934]
