# Supplementary material for: Genome-wide association study of pigmentary traits (skin and iris color) in individuals of East Asian ancestry
Source: PubMed Central journal article supplement (PMC5671666; doi:10.7717/peerj.3951), 2017-11-02
Supplement: peerj-05-3951-s009.pdf [file peerj-05-3951-s009.pdf]

# rs55821297

Plotted SNPs

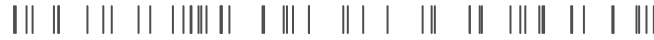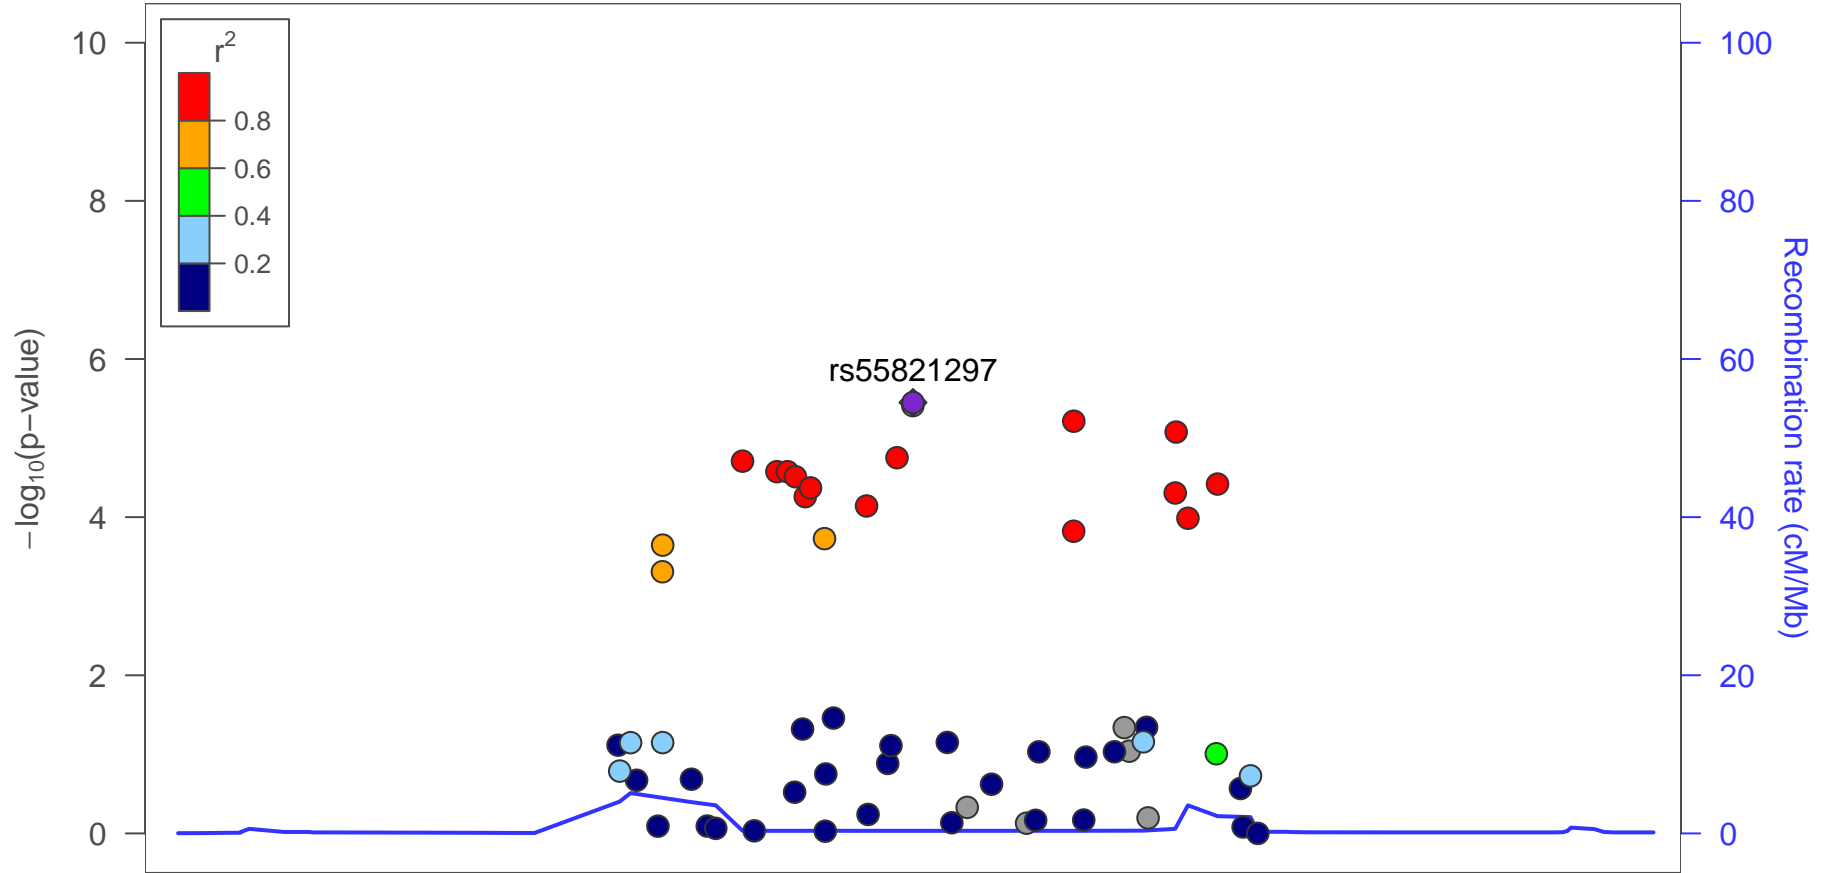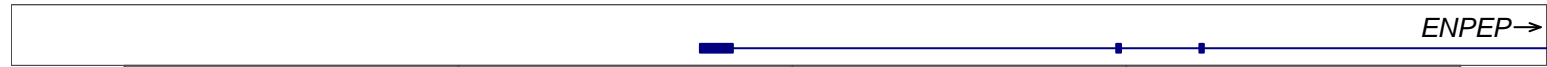

111.38      111.39      111.4      111.41      111.42  
Position on chr4 (Mb)

date: Fri Jul 28 01:13:34 2017

build: hg19

display range: chr4:111376598–111422598 [111376598–111422598]

hilite range: 0 – 0 [ 0 – 0 ]

reference SNP: chr4:111399598

number of SNPs plotted: 58

min P.value: 3.55E–6 [chr4:111399598]

max P.value: 9.98E–1 [chr4:111409925]

# rs72763726

Plotted SNPs

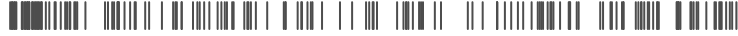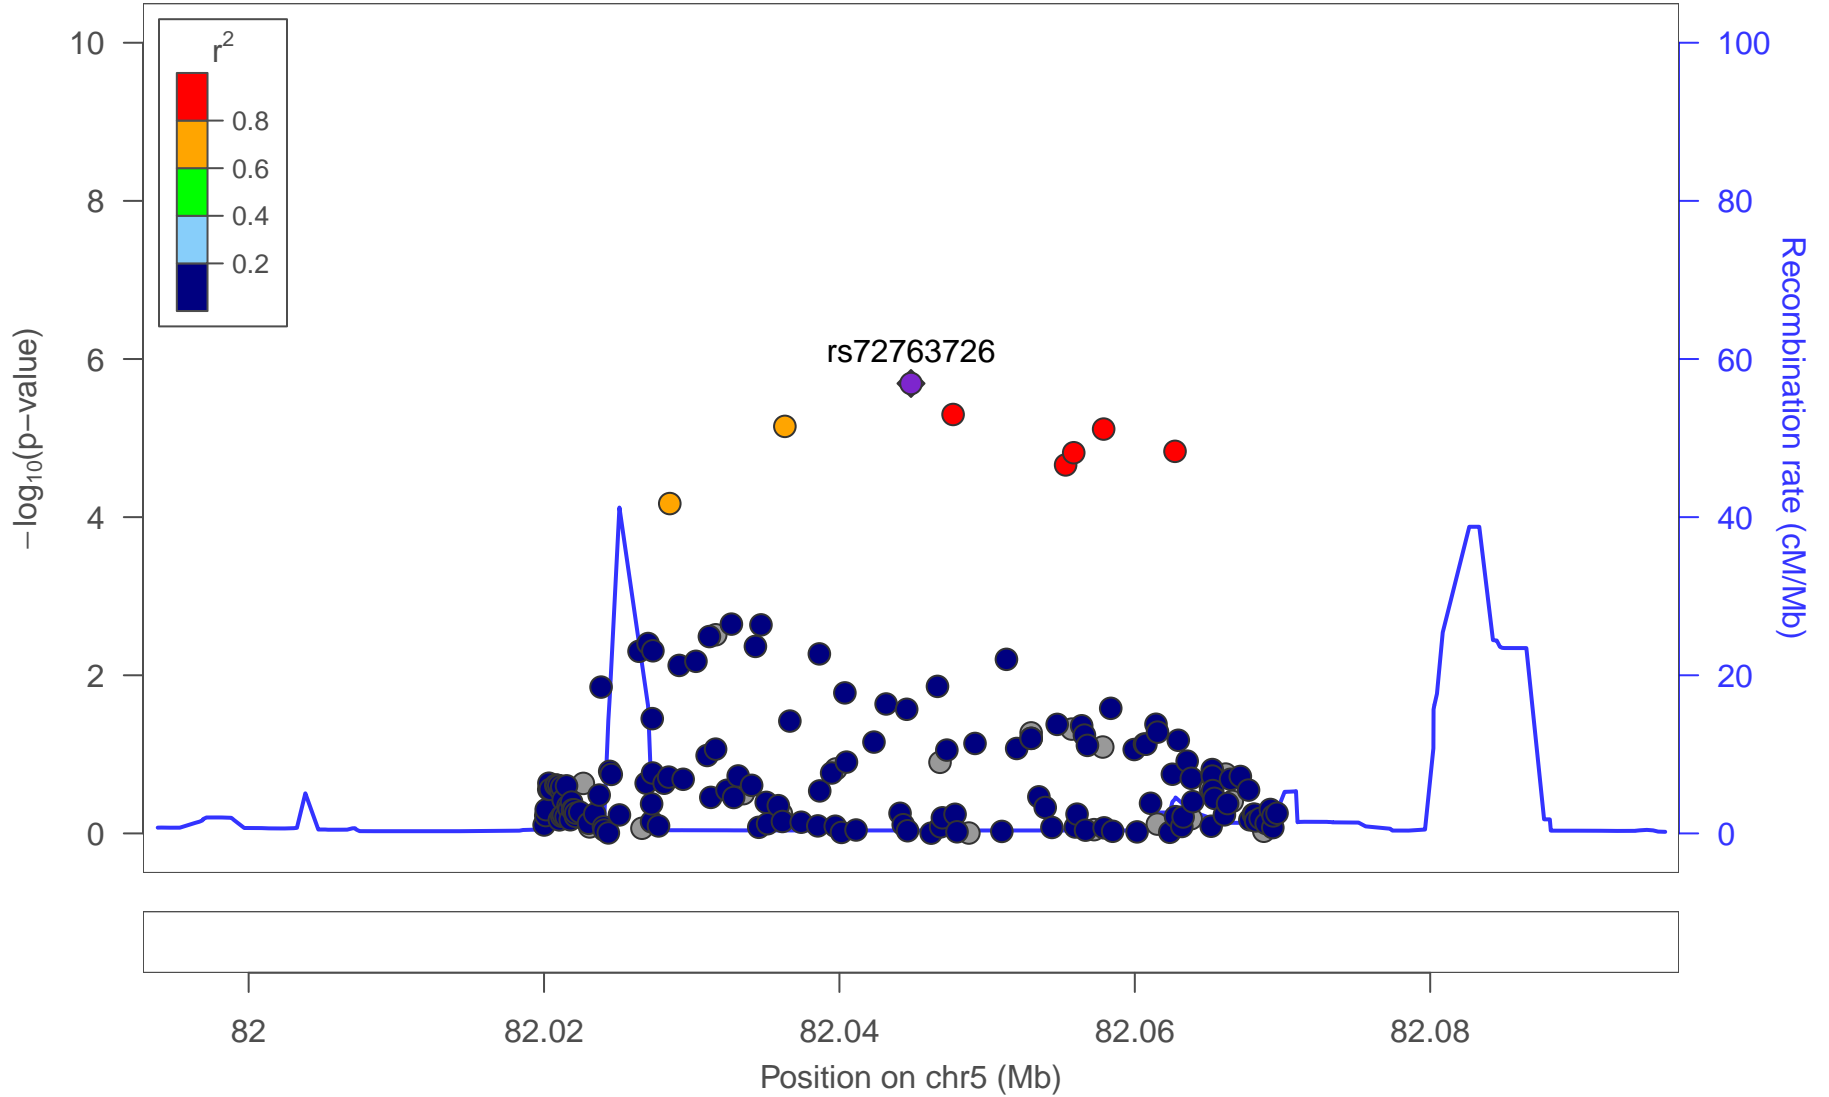

date: Fri Jul 28 01:56:56 2017

build: hg19

display range: chr5:81992846–82096846 [81992846–82096846]

hilite range: 0 – 0 [ 0 – 0 ]

reference SNP: chr5:82044846

number of SNPs plotted: 175

min P.value: 2.04E–6 [chr5:82044846]

max P.value: 9.92E–1 [chr5:82046207]

# rs330203

Plotted SNPs

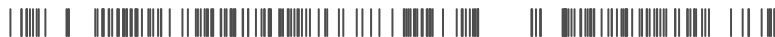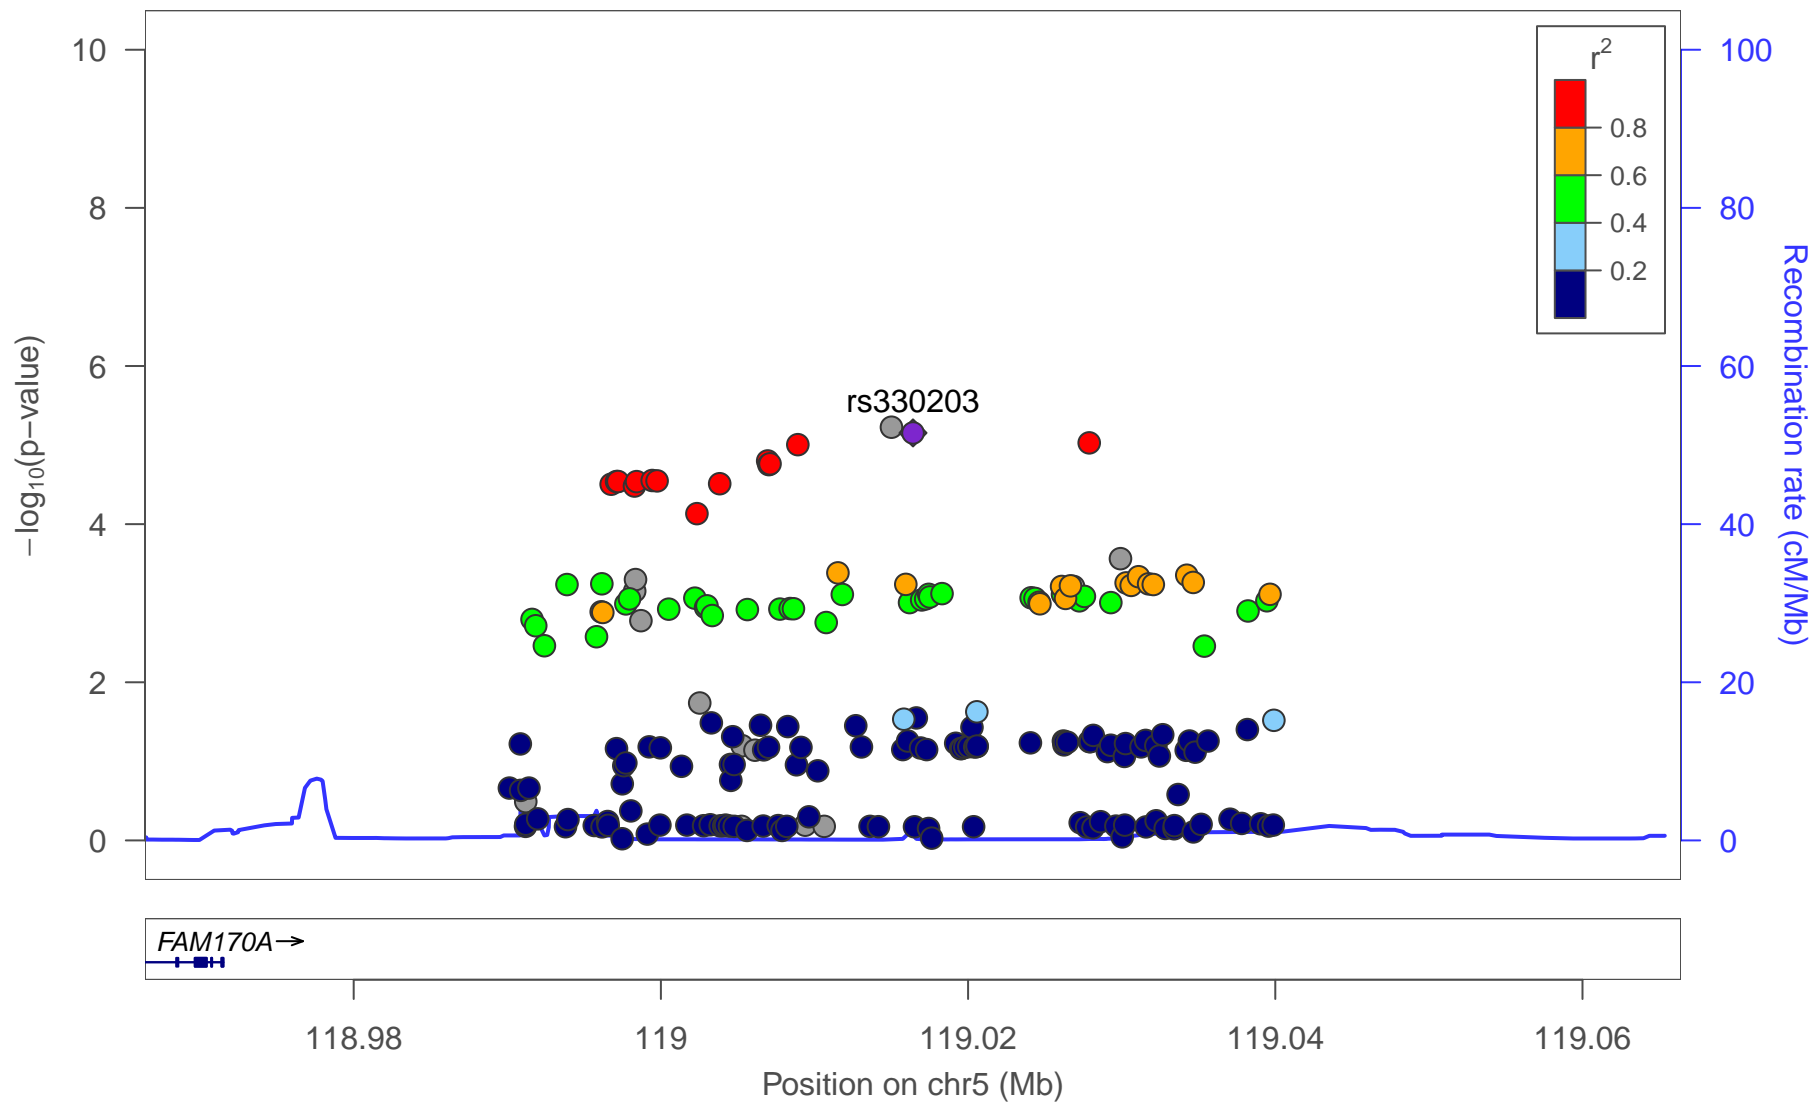

date: Fri Jul 28 01:03:38 2017

build: hg19

display range: chr5:118966414–119066414 [118966414–119066414]

hilite range: 0 – 0 [ 0 – 0 ]

reference SNP: chr5:119016414

number of SNPs plotted: 198

min P.value: 5.94E–6 [chr5:119015012]

max P.value: 9.51E–1 [chr5:118997478]

# rs9345521

Plotted SNPs

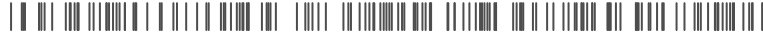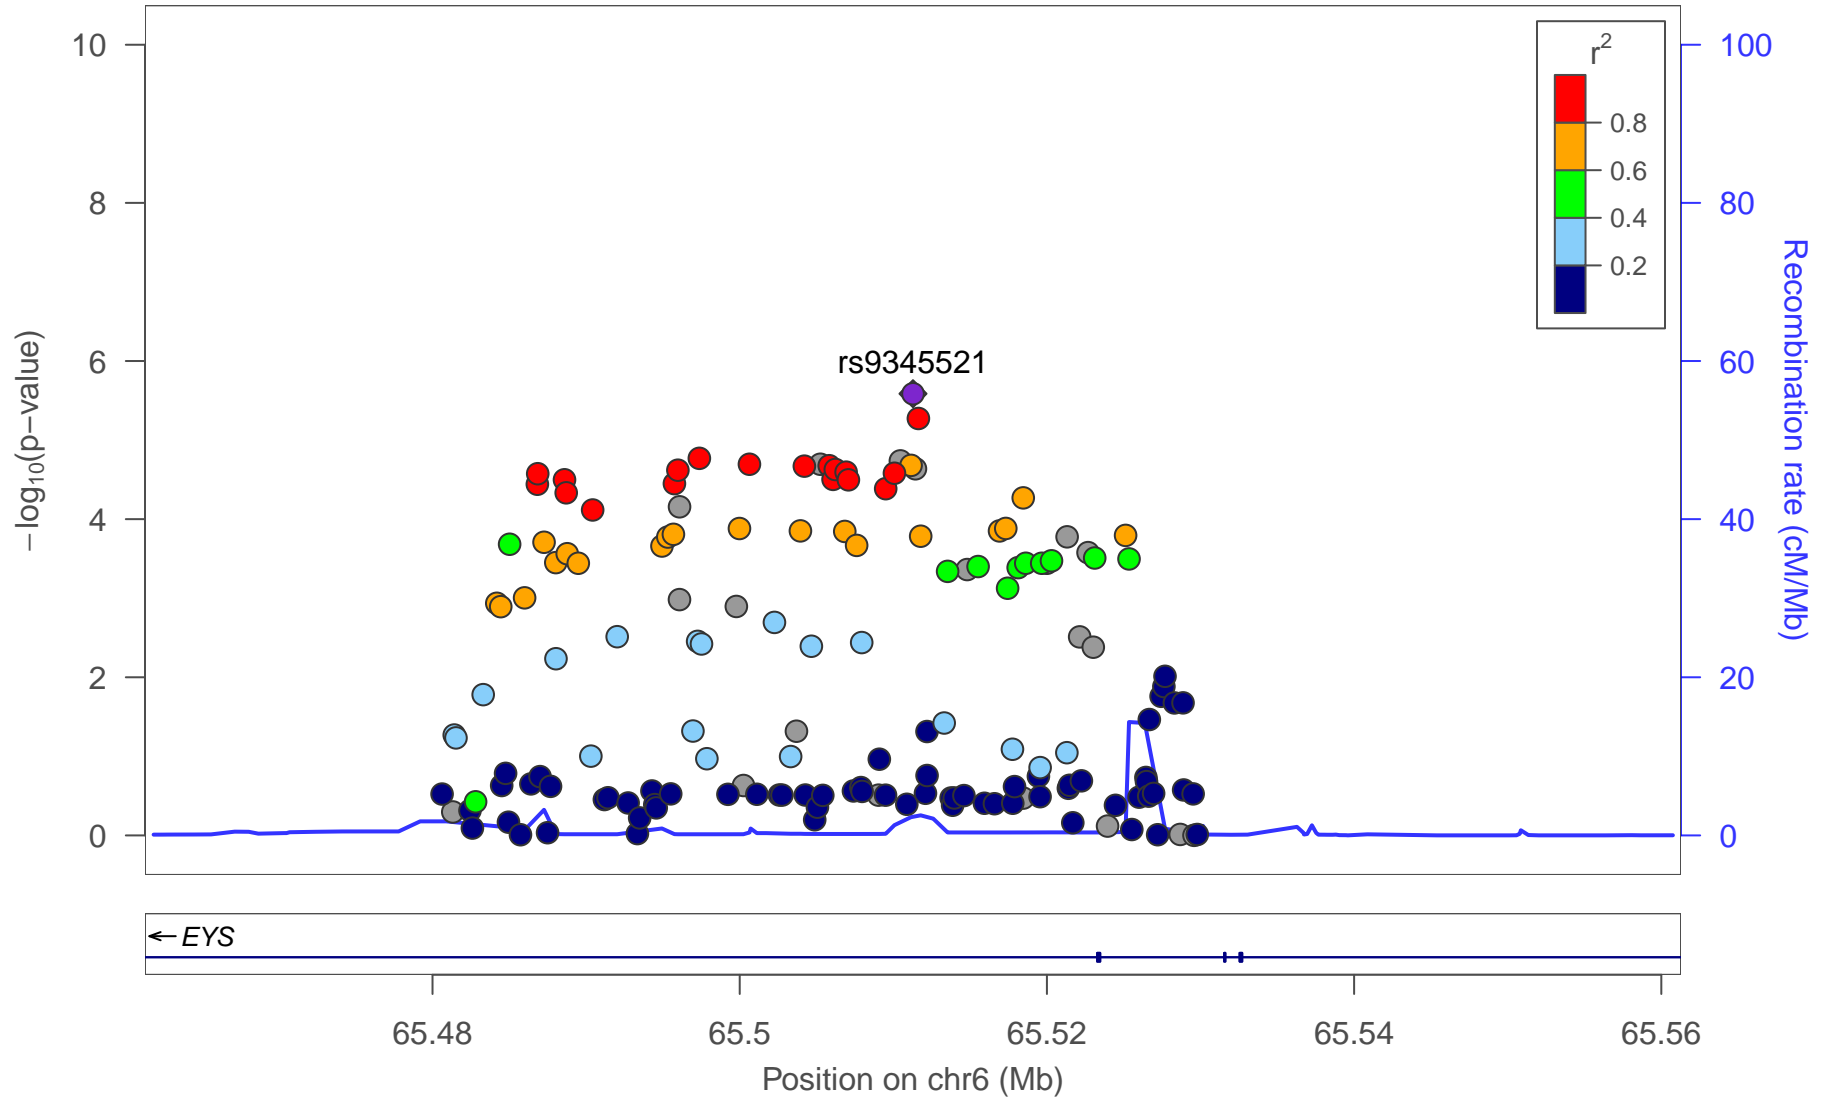

date: Fri Jul 28 02:12:33 2017

build: hg19

display range: chr6:65461281–65561281 [65461281–65561281]

hilite range: 0 – 0 [ 0 – 0 ]

reference SNP: chr6:65511281

number of SNPs plotted: 157

min P.value: 2.59E–6 [chr6:65511281]

max P.value: 9.97E–1 [chr6:65529577]



# rs78001527

Plotted SNPs

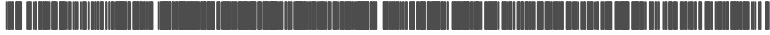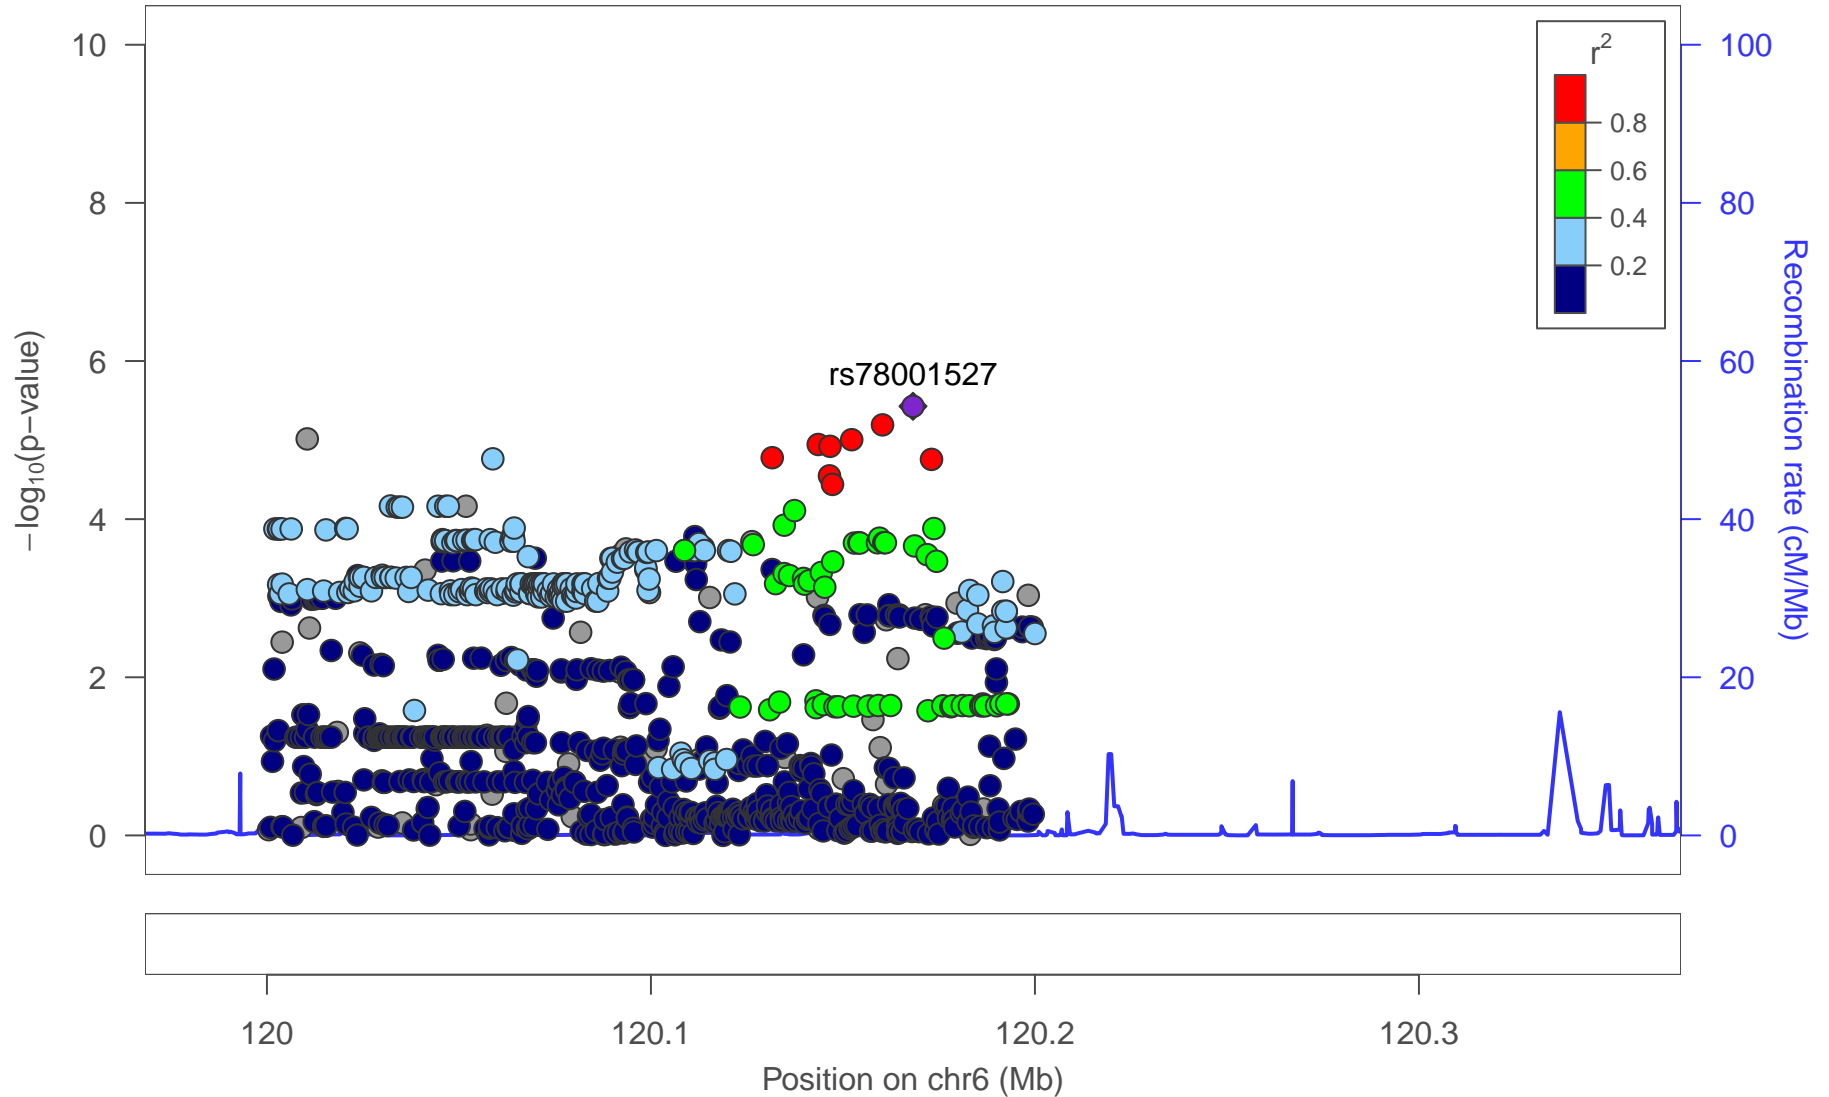

date: Fri Jul 28 02:07:52 2017

build: hg19

display range: chr6:119968240–120368240 [119968240–120368240]

hilite range: 0 – 0 [ 0 – 0 ]

reference SNP: chr6:120168240

number of SNPs plotted: 929

min P.value: 3.74E–6 [chr6:120168240]

max P.value: 9.98E–1 [chr6:120103856]

# rs6977845

Plotted SNPs

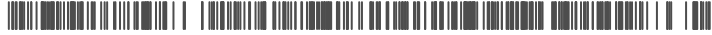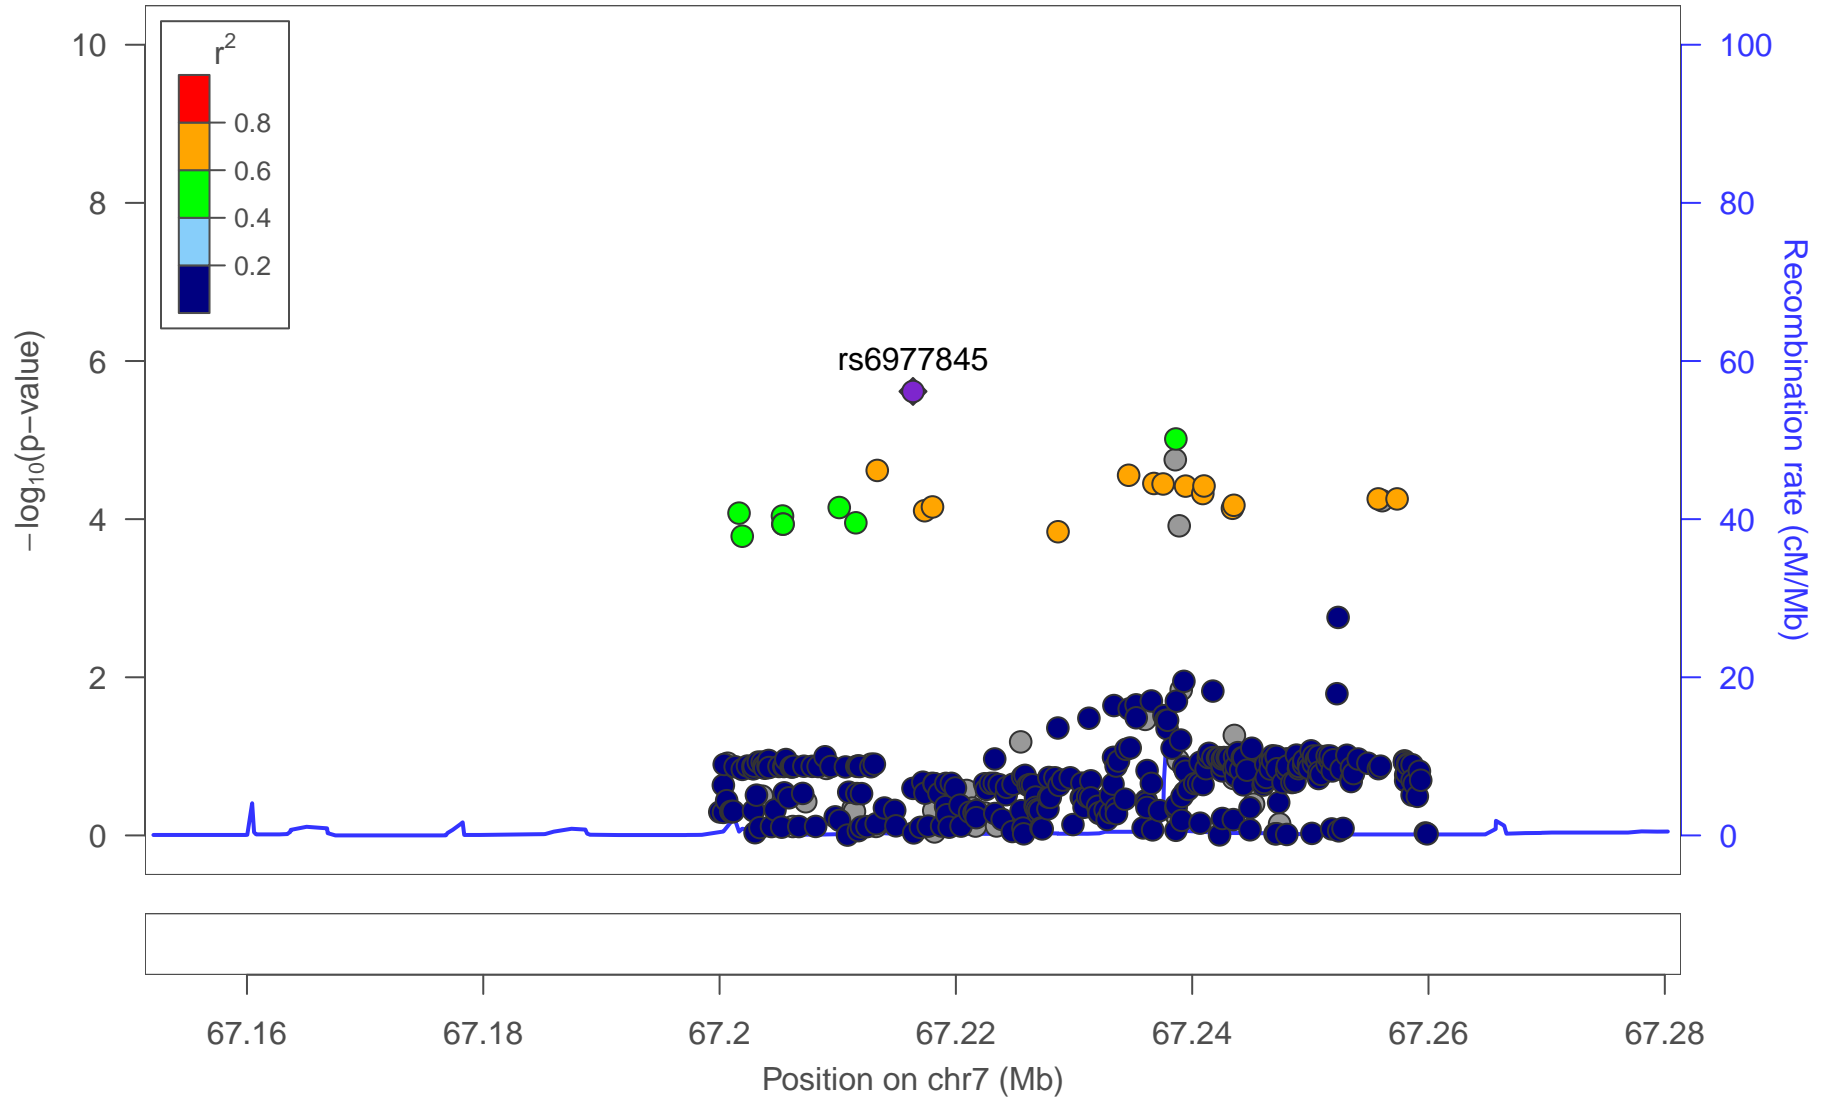

date: Fri Jul 28 01:50:05 2017

build: hg19

display range: chr7:67151370–67281370 [67151370–67281370]

hilite range: 0 – 0 [ 0 – 0 ]

reference SNP: chr7:67216370

number of SNPs plotted: 355

min P.value: 2.42E–6 [chr7:67216370]

max P.value: 9.89E–1 [chr7:67210827]

# rs76930569

Plotted SNPs

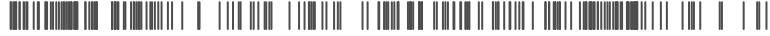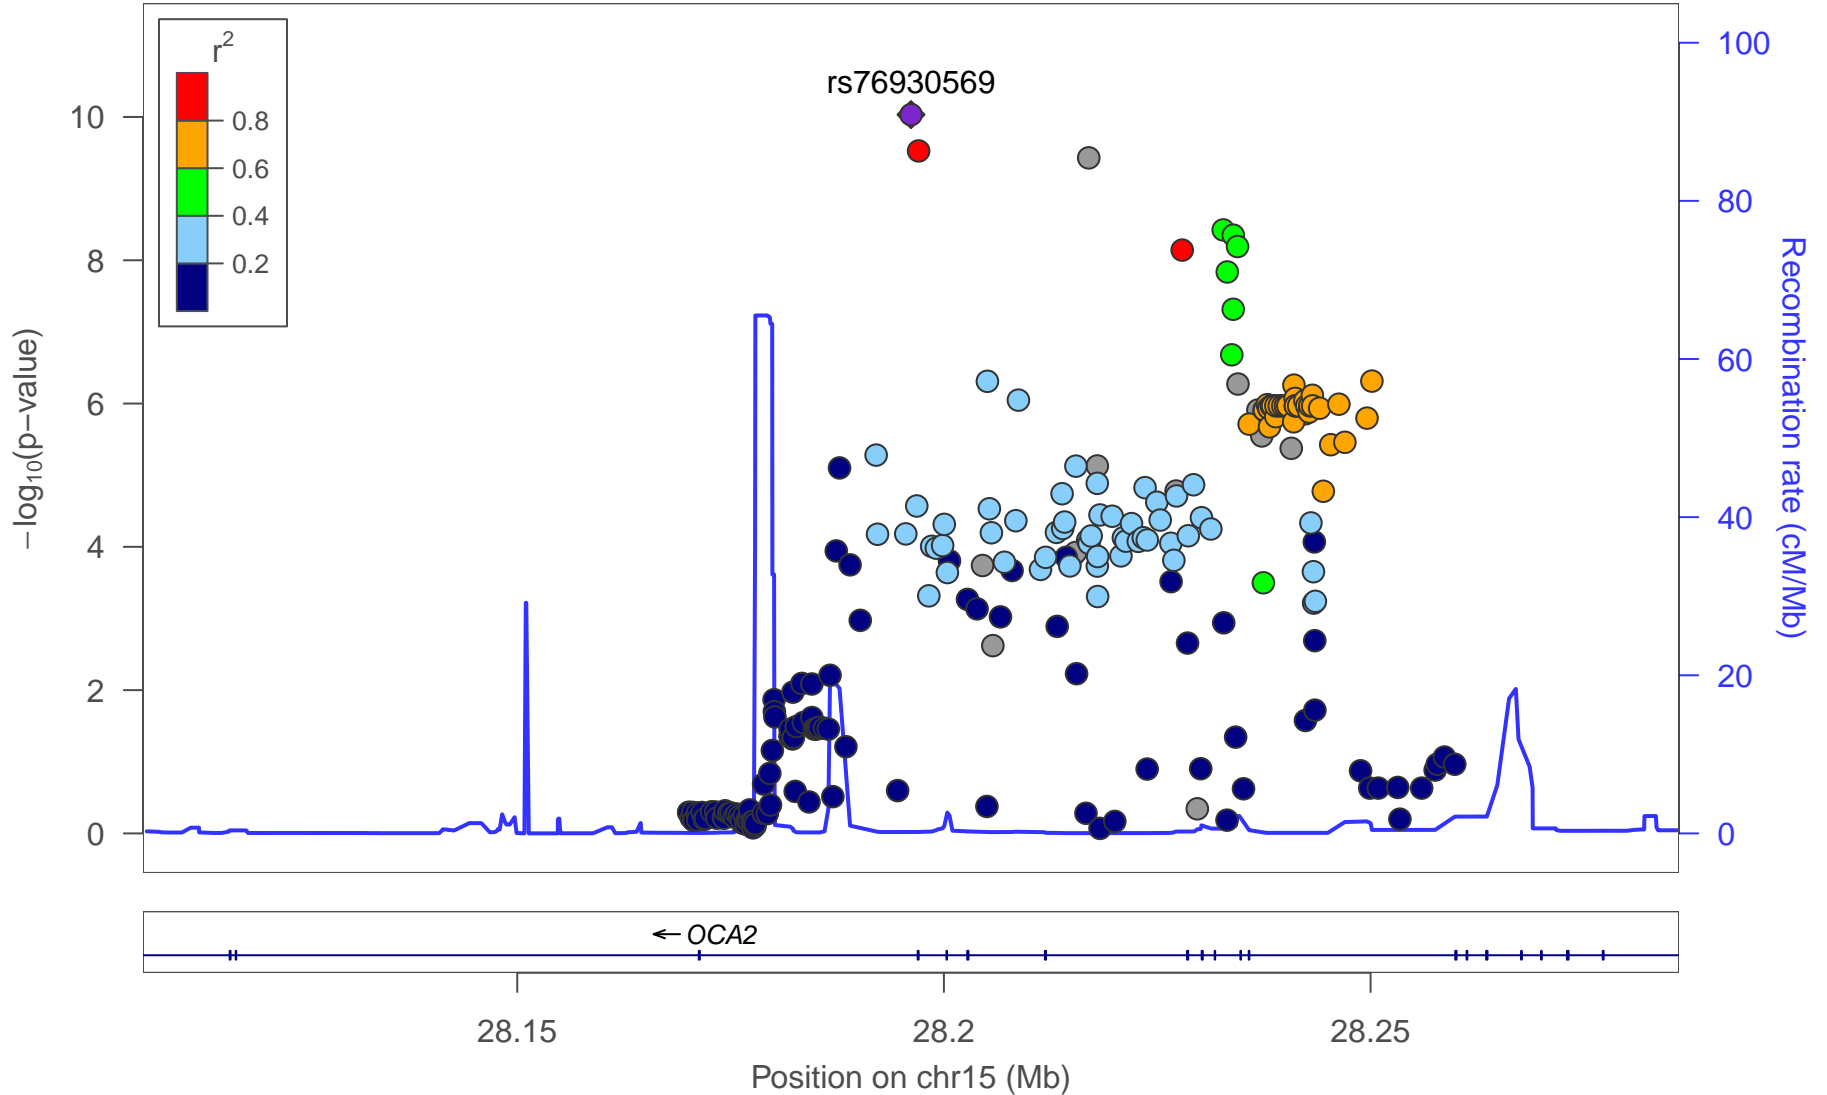

date: Fri Jul 28 02:01:21 2017

build: hg19

display range: chr15:28106145–28286145 [28106145–28286145]

hilite range: 0 – 0 [ 0 – 0 ]

reference SNP: chr15:28196145

number of SNPs plotted: 221

min P.value: 9.27E–11 [chr15:28196145]

max P.value: 8.49E–1 [chr15:28218295]
