# Supplementary material for: Genome-wide association study of pigmentary traits (skin and iris color) in individuals of East Asian ancestry
Source: PubMed Central journal article supplement (PMC5671666; doi:10.7717/peerj.3951), 2017-11-02
Supplement: peerj-05-3951-s011.pdf [file peerj-05-3951-s011.pdf]

# rs72776813

Plotted SNPs

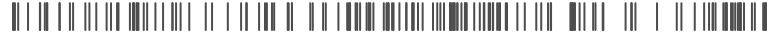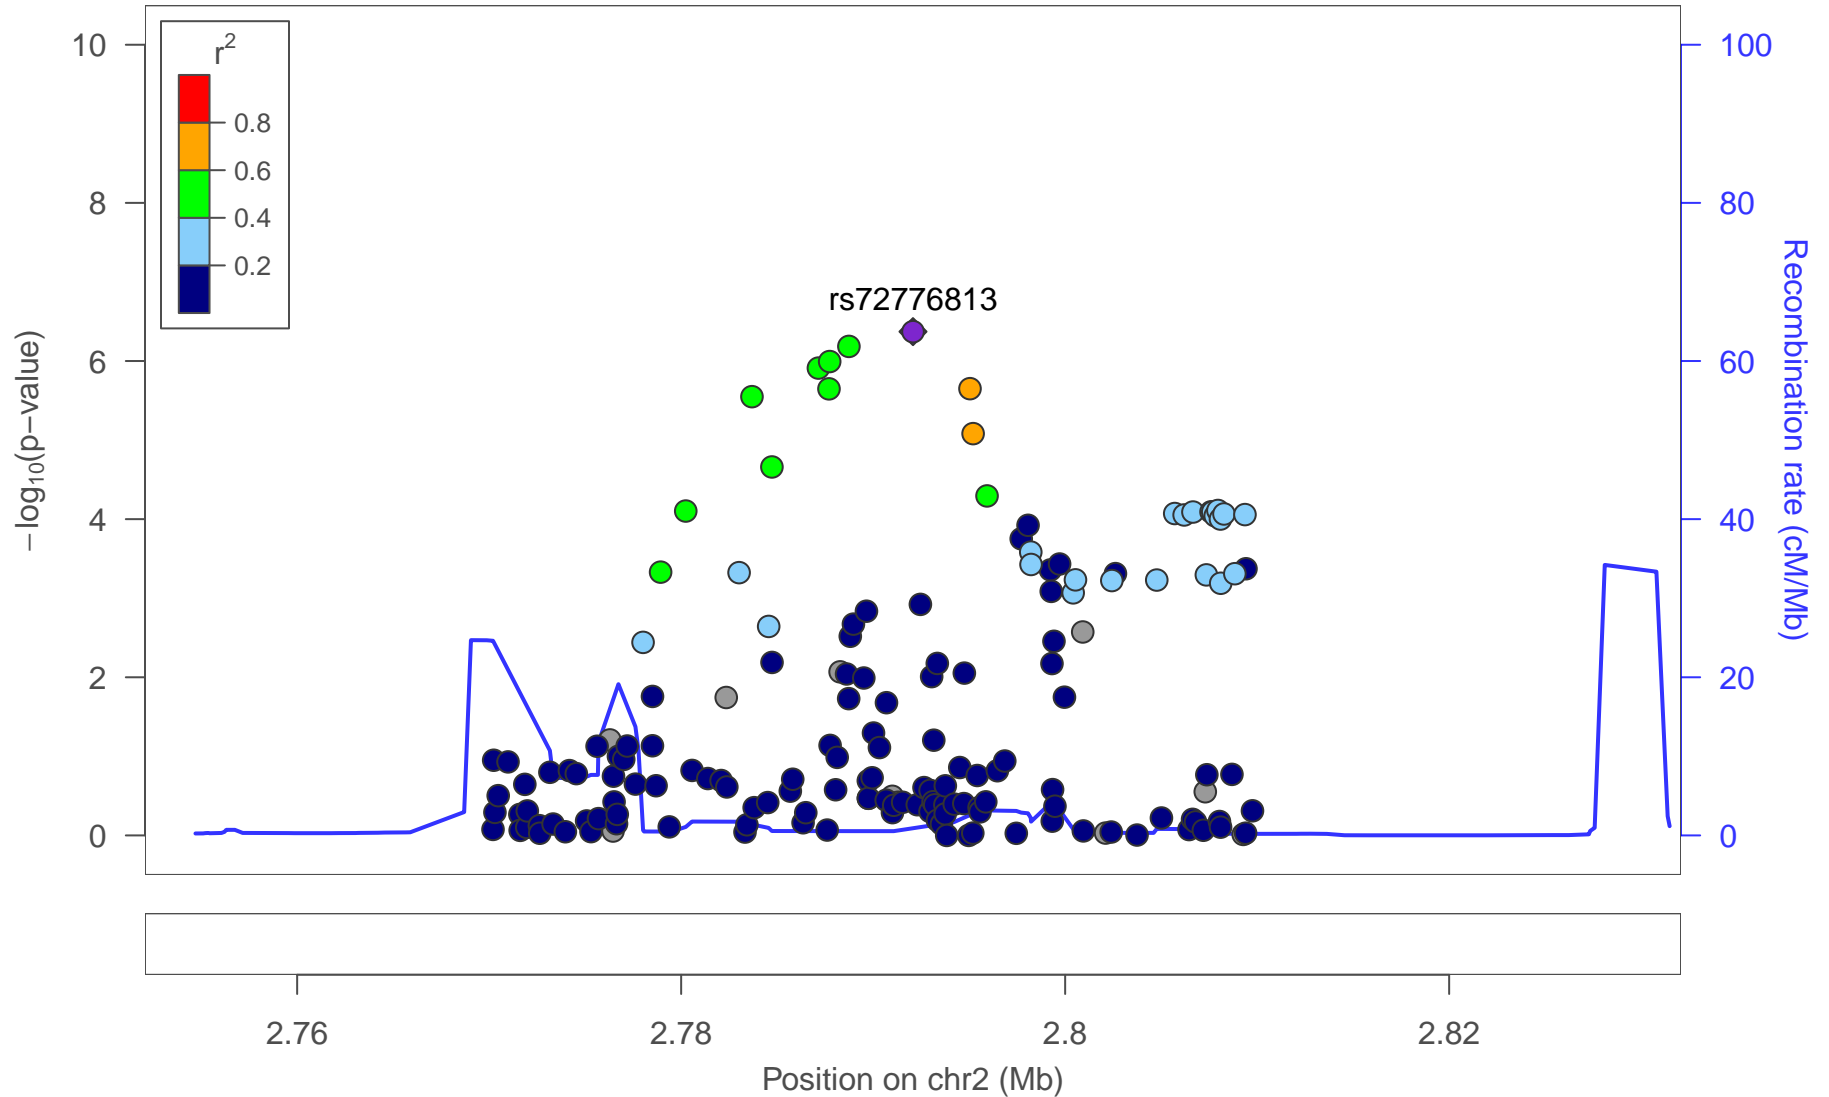

date: Fri Jul 28 05:39:29 2017

build: hg19

display range: chr2:2752075–2832075 [2752075–2832075]

hilite range: 0 – 0 [ 0 – 0 ]

reference SNP: chr2:2792075

number of SNPs plotted: 168

min P.value: 4.25E–7 [chr2:2792075]

max P.value: 9.99E–1 [chr2:2793832]

# rs243946

Plotted SNPs

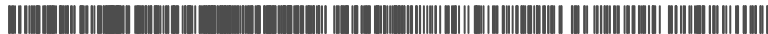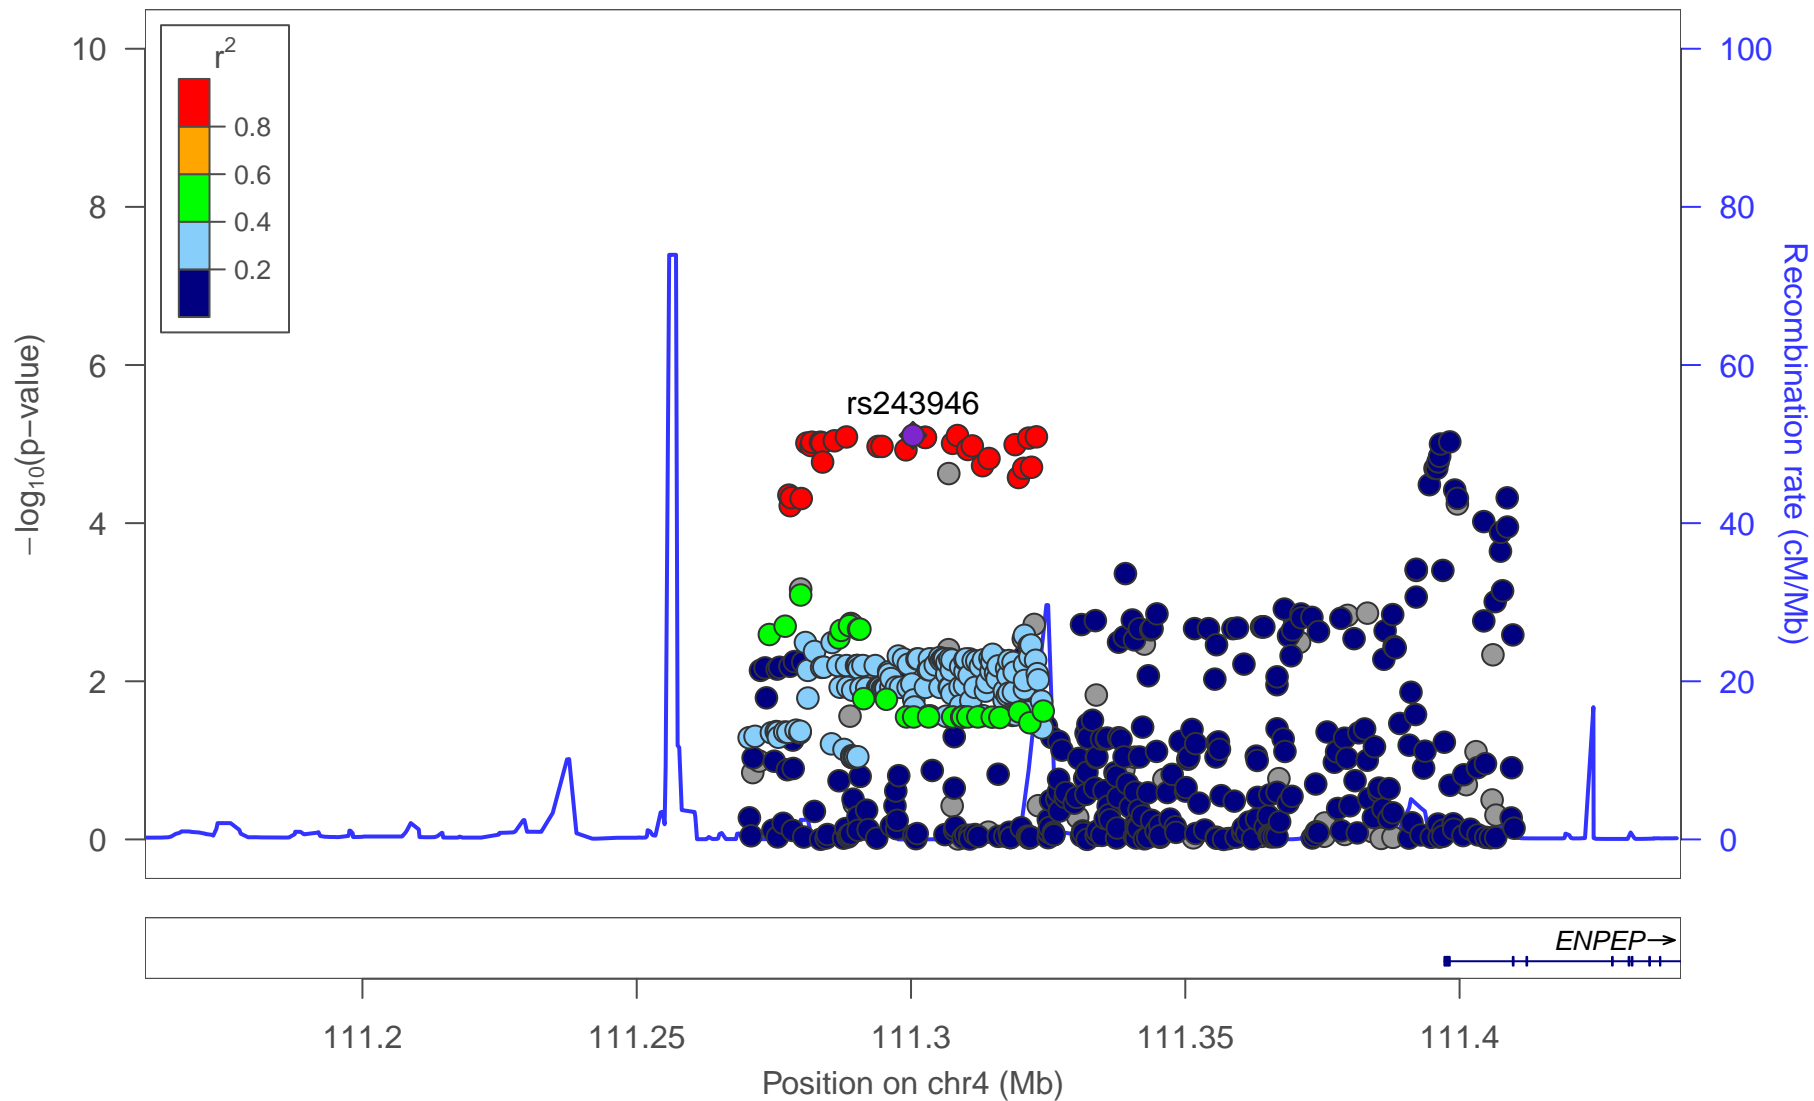

date: Fri Jul 28 05:11:02 2017

build: hg19

display range: chr4:111160362–111440362 [111160362–111440362]

hilite range: 0 – 0 [ 0 – 0 ]

reference SNP: chr4:111300362

number of SNPs plotted: 562

min P.value: 7.74E–6 [chr4:111300362]

max P.value: 9.99E–1 [chr4:111356969]

# rs16904127

Plotted SNPs

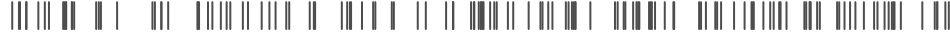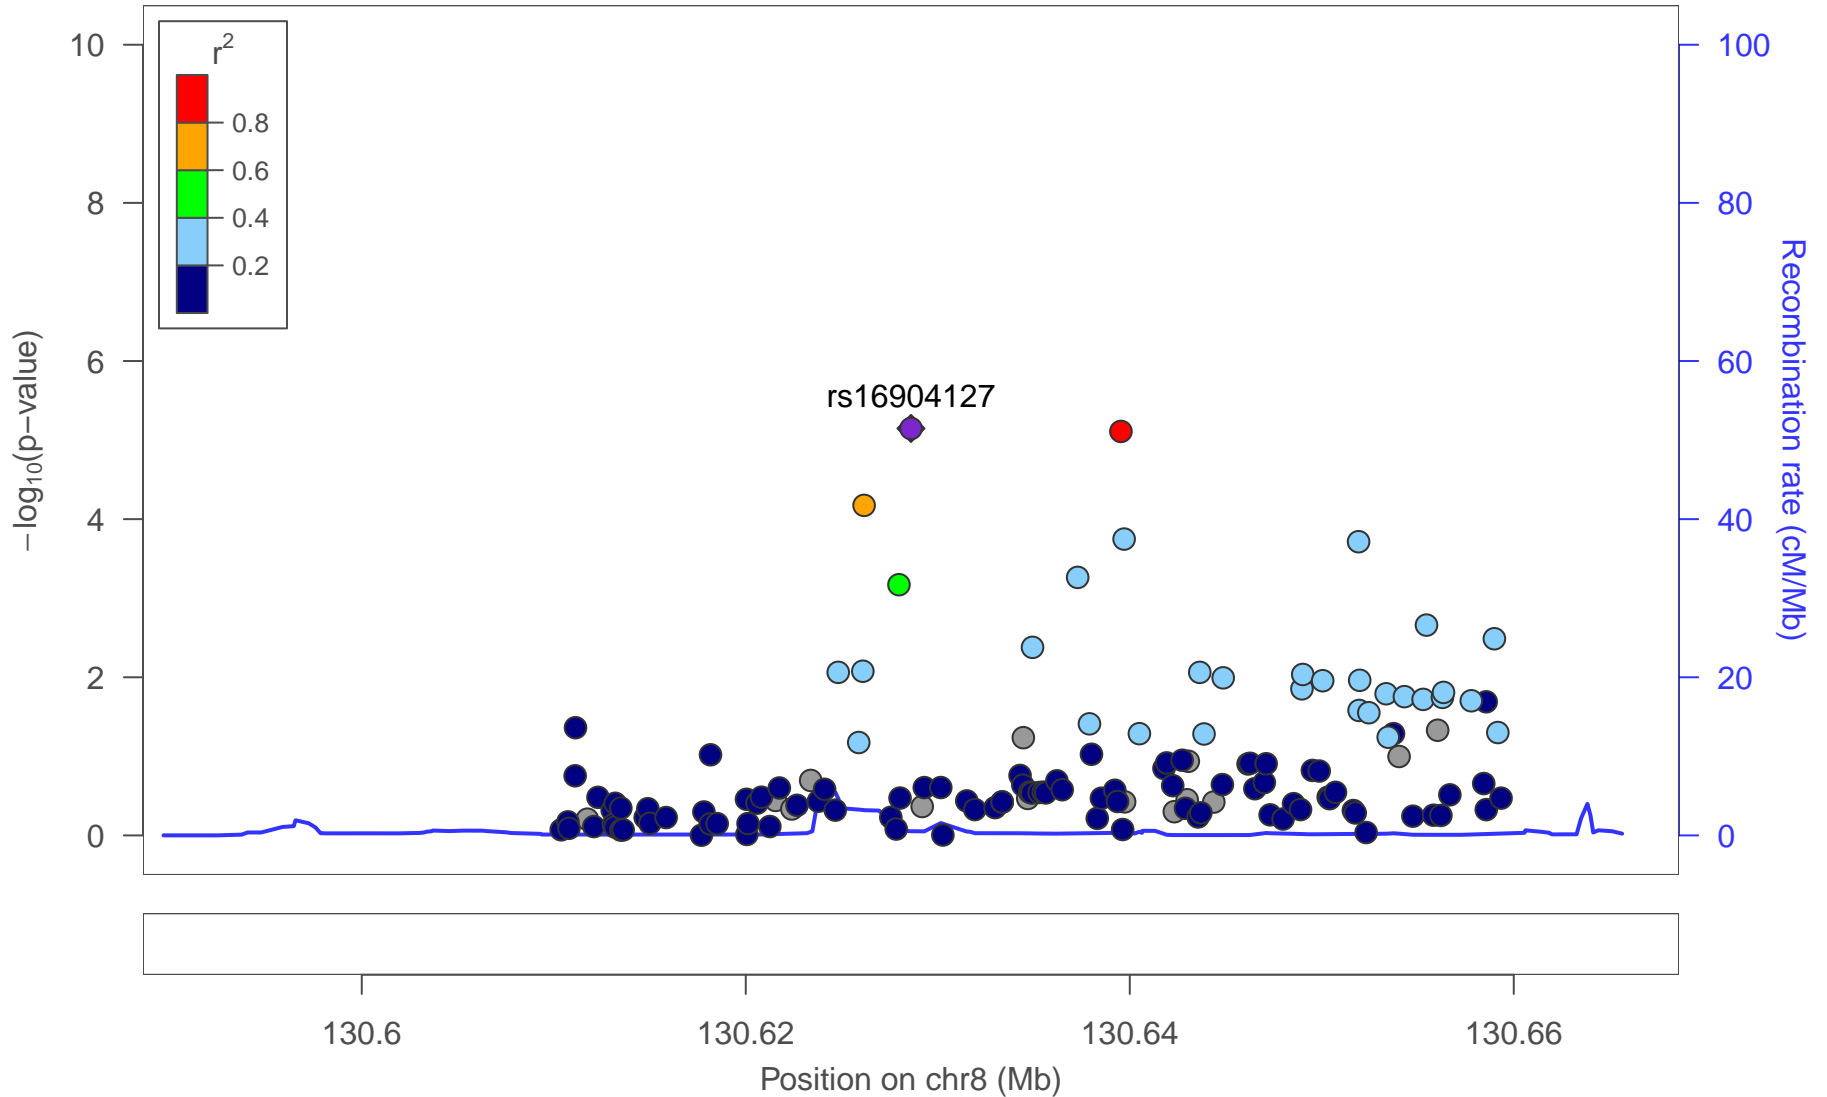

date: Fri Jul 28 05:43:18 2017

build: hg19

display range: chr8:130588606–130668606 [130588606–130668606]

hilite range: 0 – 0 [ 0 – 0 ]

reference SNP: chr8:130628606

number of SNPs plotted: 143

min P.value: 7.13E–6 [chr8:130628606]

max P.value: 9.93E–1 [chr8:130617692]

# rs7914735

Plotted SNPs

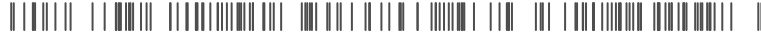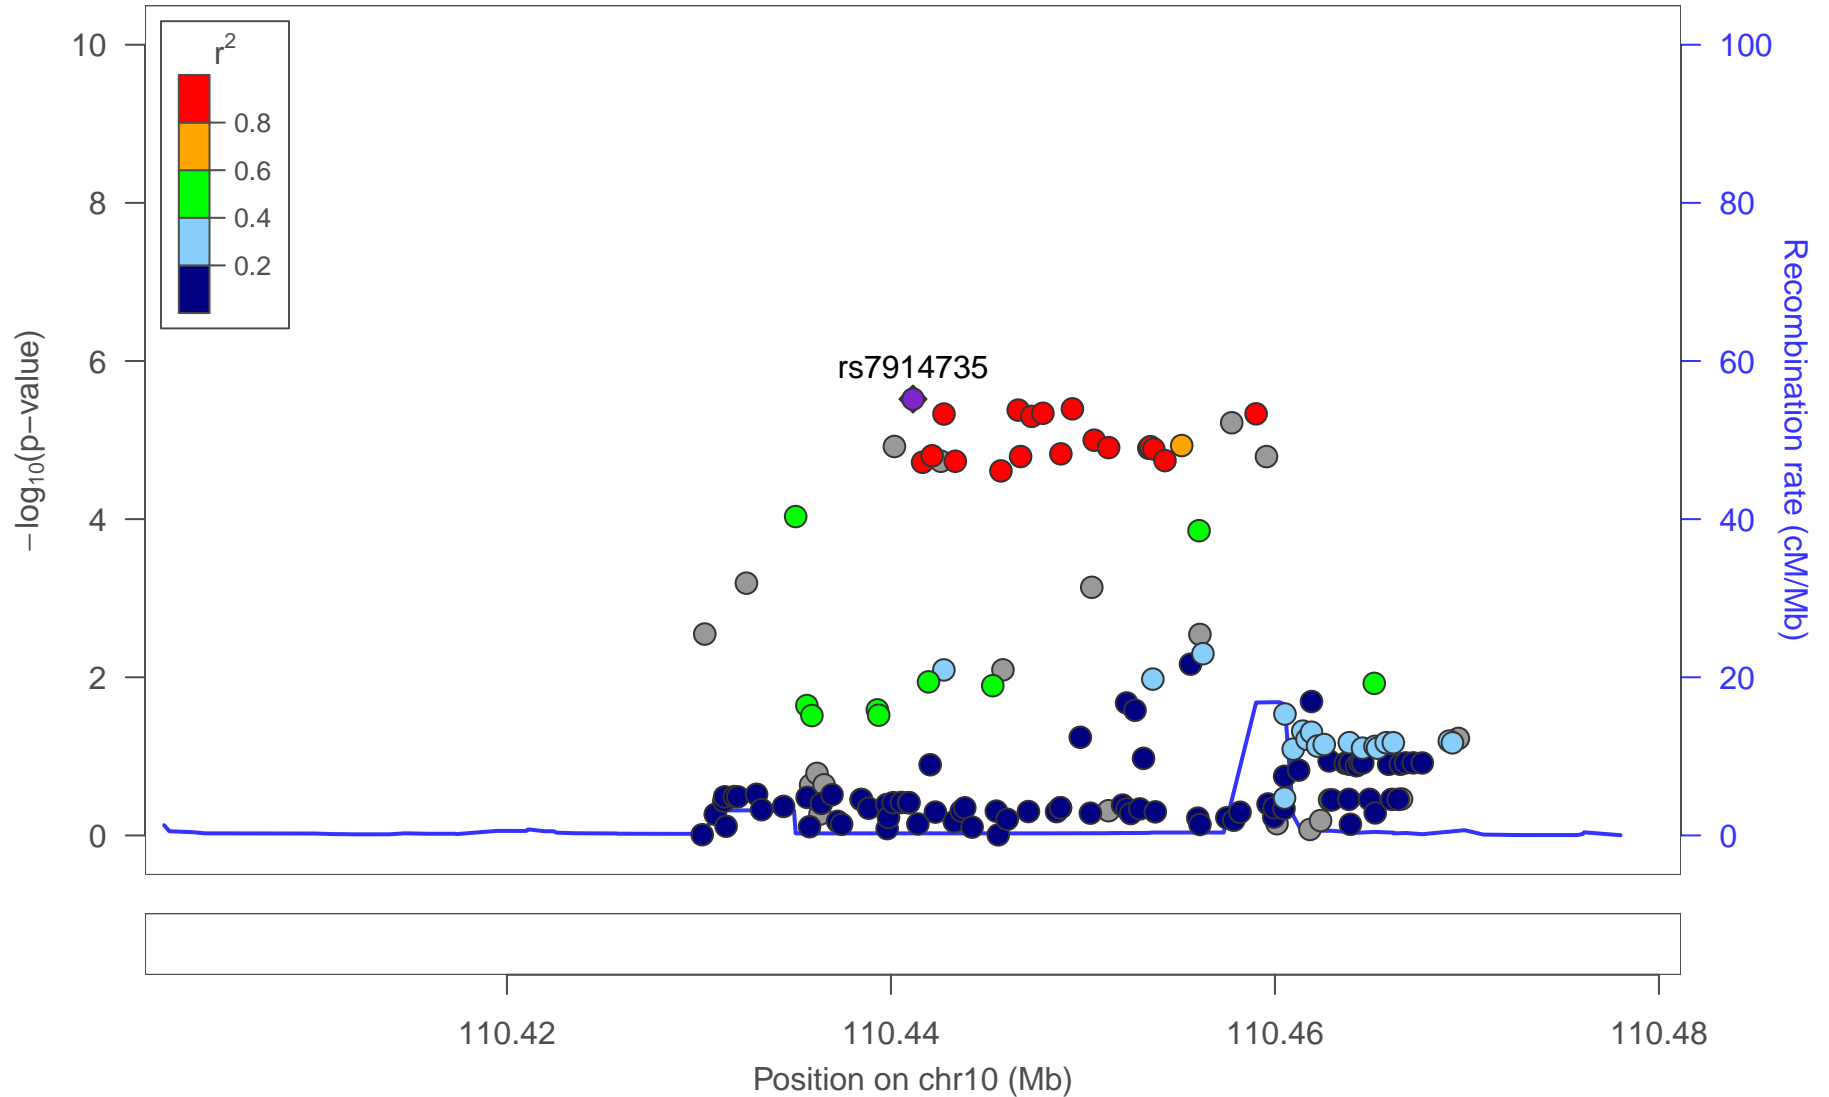

date: Fri Jul 28 05:22:06 2017

build: hg19

display range: chr10:110401149–110481149 [110401149–110481149]

hilite range: 0 – 0 [ 0 – 0 ]

reference SNP: chr10:110441149

number of SNPs plotted: 151

min P.value: 3.03E–6 [chr10:110441149]

max P.value: 9.83E–1 [chr10:110445589]



# rs11667379

Plotted SNPs

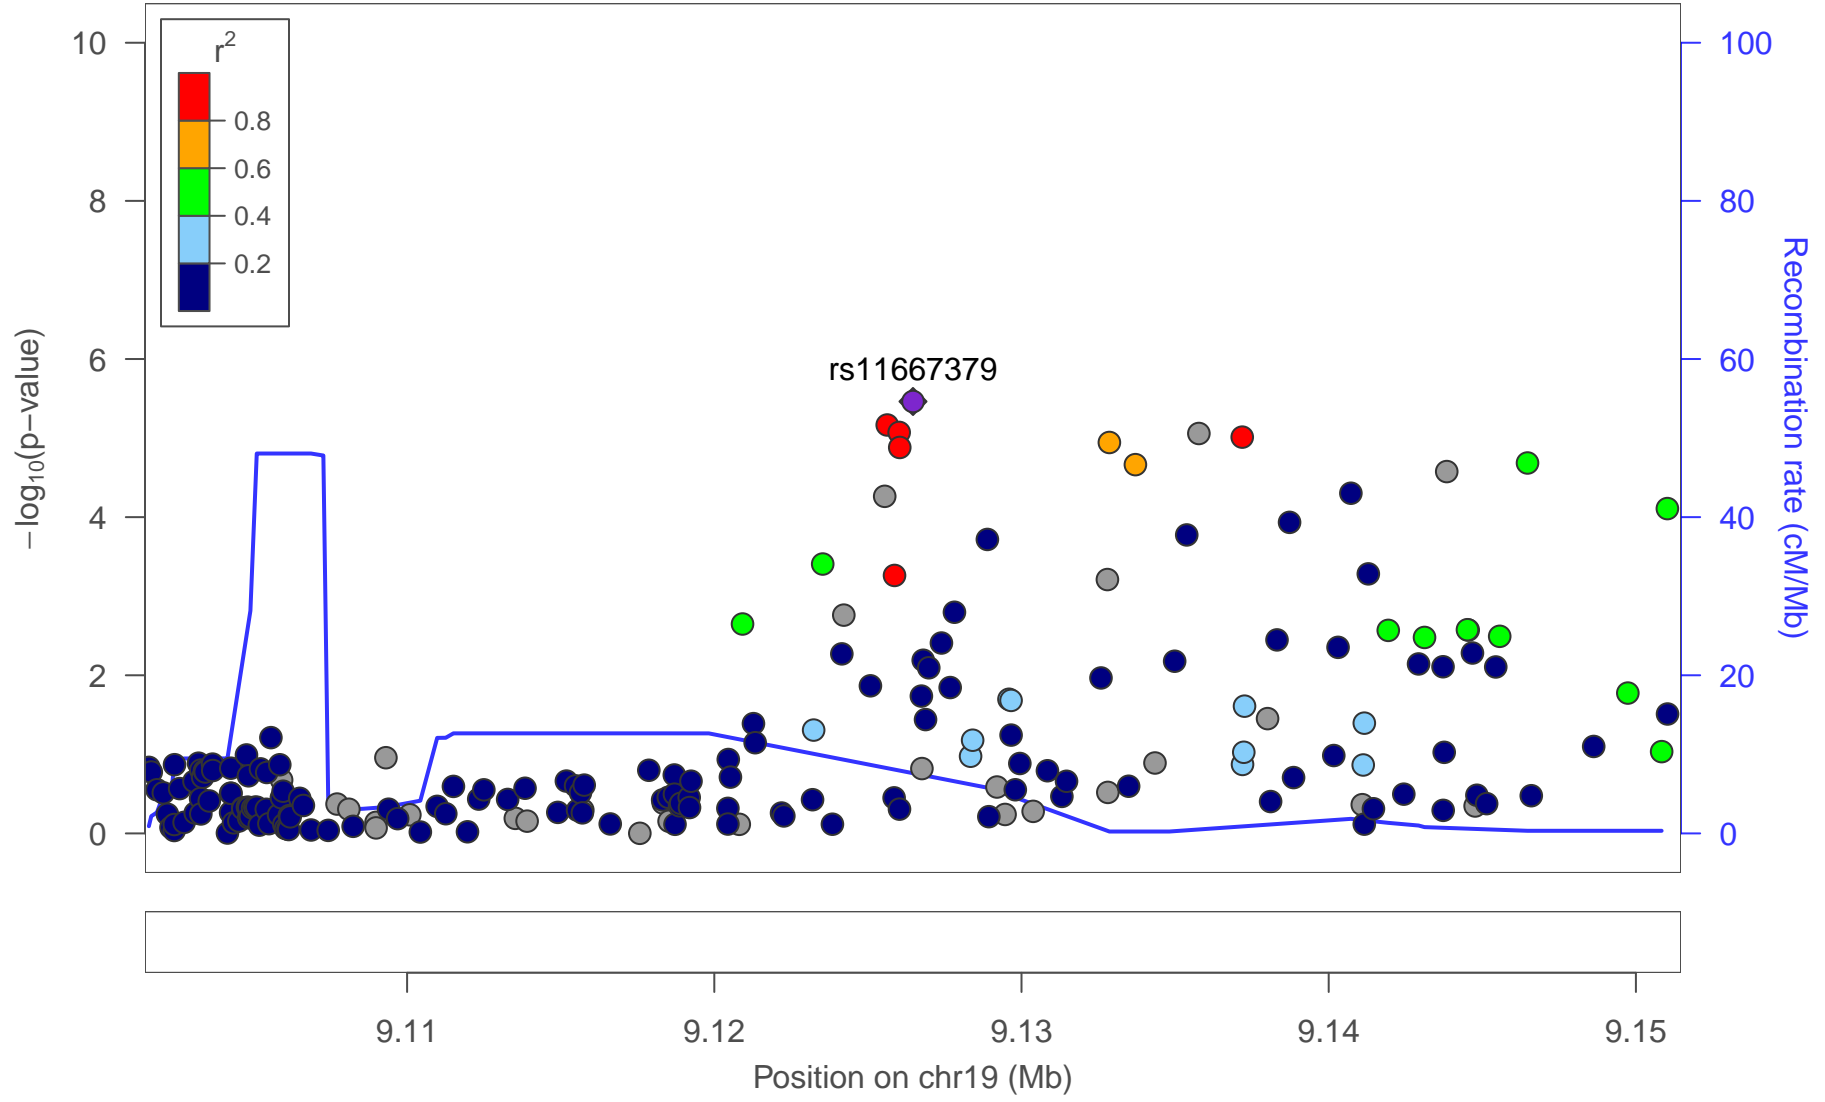

date: Mon Aug 7 13:51:19 2017

build: hg19

display range: chr19:9101468–9151468 [9101468–9151468]

hilite range: 0 – 0 [ 0 – 0 ]

reference SNP: chr19:9126468

number of SNPs plotted: 205

min p-value: 3.45E–6 [chr19:9126468]

max p-value: 9.96E–1 [chr19:9117576]
